# Supplementary material for: Br2-Catalyzed regioselective dehydrative coupling of indoles with acyloins: direct synthesis of α-(3-indolyl) ketones
Source: Royal Society of Chemistry journal article supplement (doi:10.1039/c6ra03321k), 2016-01-01
Supplement: c6ra03321k1.pdf [file c6ra03321k1.pdf]

## Supporting Information

### **Br<sub>2</sub>-Catalyzed Regioselective Dehydrative Coupling of Indoles with Acyloins: Direct Synthesis of $\alpha$ -(3-Indolyl) Ketones**

Deqiang Liang,<sup>a,\*</sup> Xiangguang Li,<sup>a</sup> Yanni Li,<sup>a</sup> Yungang Yang,<sup>a</sup> Shulin Gao,<sup>a,\*</sup> Ping Cheng<sup>b</sup>

<sup>a</sup> Department of Chemistry, Kunming University, Kunming 650214, China

<sup>b</sup> School of Environmental and Chemical Engineering, Shanghai University, Shanghai  
200444, China

\*E-mail: liangdq695@nenu.edu.cn (D. Liang); shulin.gao@yahoo.com (S. Gao)

#### **Table of Contents**

|                                                                                                                                              |     |
|----------------------------------------------------------------------------------------------------------------------------------------------|-----|
| <b>I. General information</b> .....                                                                                                          | S2  |
| <b>II. General procedure</b> .....                                                                                                           | S3  |
| <b>III. Spectral data of all products</b> .....                                                                                              | S4  |
| <b>IV. Copies of NMR spectra for all products</b> .....                                                                                      | S16 |
| <b>V. Stability and charge calculations</b> .....                                                                                            | S46 |
| <b>Table S1.</b> Stabilities and natural population atomic charges (NPA) of the benzyl<br>cations at the M062X/def2TZVP level of theory..... | S46 |
| Coordinates of optimised geometries.....                                                                                                     | S47 |
| <b>VI. Calculations of the reaction mechanism</b> .....                                                                                      | S51 |
| <b>Table S2.</b> The crucial bond distances of complexes involved in the reaction pathway<br>calculated at the SMD-M062X/6-31G(d) level..... | S51 |
| <b>Table S3.</b> The natural population (e) analysis (NPA) for the involved atoms<br>calculated at the SMD-M062X/6-31G(d) level.....         | S51 |
| Coordinates of optimised geometries.....                                                                                                     | S52 |

## I. General information

Chemicals were all purchased from commercial sources and used without treatment. Thin-layer chromatography (TLC) was carried out using silica gel GF254 plates. Products were purified by column chromatography over silica gel.  $^1\text{H}$  NMR and  $^{13}\text{C}$  NMR spectra were recorded at 25 °C on a Bruker Ascend<sup>TM</sup> 400 spectrometer in  $\text{CDCl}_3/\text{DMSO}$  using TMS as internal standard. The following abbreviations were used to indicate the multiplicity in NMR spectra: s, singlet; d, doublet; t, triplet; q, quartet; quint, quintet; sext, sextet; oct, octet; m, multiplet; bs, broad signal.  $^{13}\text{C}$  NMR spectra were acquired on a broad band decoupled mode. High-resolution mass spectra (HRMS) were obtained using a Bruker microTOF II Focus spectrometer (ESI). The key products **3b1**,<sup>[1]</sup> **3d1**,<sup>[1]</sup> **5a**,<sup>[2]</sup> **5b**<sup>[3]</sup> and **7**<sup>[4]</sup> are known compounds, and their spectral data match well with literatures.

Optimization of all molecular geometries and vibrational analyses were calculated at M06-2X<sup>[5]</sup> functions with the def2TZVP<sup>[6]</sup> or 6-31G(d) basis sets by using Gaussian 09 program.<sup>[7]</sup> A natural bonding orbital (NBO) analysis for structures was also performed to determine the natural population atomic (NPA) charges by using the NBO 3.1 package implemented in Gaussian 09. The Gibbs free energy changes ( $\Delta G$ ) of formation of different benzyl cations were used to compare their stabilities. Solvent effect at M06-2X/6-31G(d) level was calculated using the solvation model density (SMD) approach.<sup>[8]</sup> Stationary points were characterized as minima by full vibration frequency calculations (no imaginary frequency). The minimum energy nature of the optimized structures was verified from vibrational frequency analyses at the same level of theory, and the intrinsic reaction coordinate calculations (IRC) were performed to ensure that transition-state structures connect their respective reactants and products.

---

[1] Y. Li, F. Shi, Q. He, S. You, *Org. Lett.* **2009**, *11*, 3182–3185.

[2] H. Hikawa, H. Suzuki, I. Azumaya, *J. Org. Chem.* **2013**, *78*, 12128–12135.

[3] T. P. Pathak, M. S. Sigman, *Org. Lett.* **2011**, *13*, 2774–2777.

[4] A. Berlin, A. Canavesi, *Tetrahedron* **1996**, *52*, 7947–7960.

[5] Y. Zhao, D. G. Truhlar, *Theor. Chem. Acc.* **2008**, *120*, 215–241.

[6] F. Weigend, R. Ahlrichs, *Phys. Chem. Chem. Phys.* **2005**, *7*, 3297–3305.

[7] M. J. Frisch, G. W. Trucks, H. B. Schlegel, G. E. Scuseria, M. A. Robb, J. R. Cheeseman, G. Scalmani, V. Barone, B. Mennucci, G. A. Petersson, H. Nakatsuji, M. Caricato, X. Li, H. P. Hratchian, A. F. Izmaylov, J. Bloino, G. Zheng, J. L. Sonnenberg, M. Hada, M. Ehara, K. Toyota, R. Fukuda, J. Hasegawa, M. Ishida, T. Nakajima, Y. Honda, O. Kitao, H. Nakai, T. Vreven, J. A. Montgomery, Jr., J. E. Peralta, F. Ogliaro, M. Bearpark, J. J. Heyd, E. Brothers, K. N. Kudin, V. N. Staroverov, R. Kobayashi, J. Normand, K. Raghavachari, A. Rendell, J. C. Burant, S. S. Iyengar, J. Tomasi, M. Cossi, N. Rega, J. M. Millam, M. Klene, J. E. Knox, J. B. Cross, V. Bakken, C. Adamo, J. Jaramillo, R. Gomperts, R. E. Stratmann, O. Yazyev, A. J. Austin, R. Cammi, C. Pomelli, J. W. Ochterski, R. L. Martin, K. Morokuma, V. G. Zakrzewski, G. A. Voth, P. Salvador, J. J. Dannenberg, S. Dapprich, A. D. Daniels, O. Farkas, J. B. Foresman, J. V. Ortiz, J. Cioslowski, D. J. Fox, *Gaussian 09*, Gaussian, Inc., Wallingford CT, 2009.

[8] A. V. Marenich, C. J. Cramer, D. G. Truhlar, *J. Phys. Chem. B* **2009**, *113*, 6378–6396.

## II. General procedure

**3a1 as example:** To a stirred solution of 1-methyl indole **1a** (66 mg, 0.5 mmol) and benzoin **2a** (117 mg, 0.55 mmol) in MeCN (4.0 mL) was added a solution of Br<sub>2</sub> (0.00077 mL) in MeCN (1.0 mL), and the mixture was stirred for 12 h at 50 °C. After **1a** was consumed, as indicated by TLC, the reaction mixture was quenched with saturated aqueous Na<sub>2</sub>S<sub>2</sub>O<sub>3</sub> (0.2 mL) and water (10.0 mL), and extracted with CH<sub>2</sub>Cl<sub>2</sub> three times. The residue obtained after evaporation of the solvent was purified by column chromatography on silica gel (petroleum ether–ethyl acetate = 20:1, v/v) to afford 2-(1-methyl-1*H*-indol-3-yl)-1,2-diphenylethanone **3a1** as a white solid (153 mg, 94% yield).

### III. Spectral data of all products

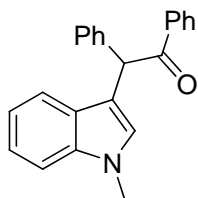

**3a1**, 2-(1-methyl-1*H*-indol-3-yl)-1,2-diphenylethanone, yellow solid: mp 120-121 °C. <sup>1</sup>H NMR (400 MHz, CDCl<sub>3</sub>)  $\delta$  = 3.73 (s, 3H), 6.28 (s, 1H), 6.89 (s, 1H), 7.08 (ddd,  $J$  = 1.0, 7.0, 7.9 Hz, 1H), 7.20-7.25 (m, 2H), 7.28-7.32 (m, 3H), 7.36-7.43 (m, 4H), 7.49-7.54 (m, 2H), 8.04-8.07 (m, 2H); <sup>13</sup>C NMR (100 MHz, CDCl<sub>3</sub>)  $\delta$  = 198.4, 139.2, 137.3, 136.9, 133.0, 129.1, 128.9, 128.7, 128.6, 128.5, 127.1, 122.0, 119.4, 118.9, 112.8, 109.5, 50.6, 32.8; HRMS (ESI-TOF) Calcd for C<sub>23</sub>H<sub>20</sub>NO<sup>+</sup> ([M+H]<sup>+</sup>) 326.1539. Found 326.1537.

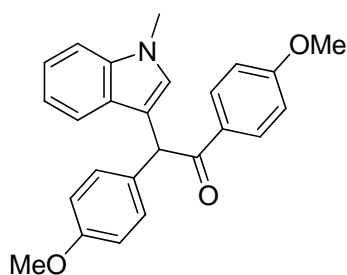

**3a2**, 1,2-bis(4-methoxyphenyl)-2-(1-methyl-1*H*-indol-3-yl)ethanone, yellow solid: mp 108-110 °C. <sup>1</sup>H NMR (400 MHz, CDCl<sub>3</sub>)  $\delta$  = 3.72 (s, 3H), 3.76 (s, 3H), 3.83 (s, 3H), 6.18 (s, 1H), 6.82-6.90 (m, 5H), 7.07 (ddd,  $J$  = 1.0, 7.0, 8.0 Hz, 1H), 7.21 (ddd,  $J$  = 1.0, 7.0, 8.0 Hz, 1H), 7.27-7.29 (m, 3H), 7.47 (d,  $J$  = 7.9 Hz, 1H), 8.05 (ddd,  $J$  = 2.9, 2.0, 9.0 Hz, 2H); <sup>13</sup>C NMR (100 MHz, CDCl<sub>3</sub>)  $\delta$  = 197.2, 163.3, 158.5, 137.2, 131.5, 131.2, 129.9, 129.8, 128.3, 127.0, 121.8, 119.2, 118.9, 113.9, 113.7, 113.4, 109.4, 55.4, 55.2, 49.4, 32.8; HRMS (ESI-TOF) Calcd for C<sub>25</sub>H<sub>24</sub>NO<sub>3</sub><sup>+</sup> ([M+H]<sup>+</sup>) 386.1751. Found 386.1754.

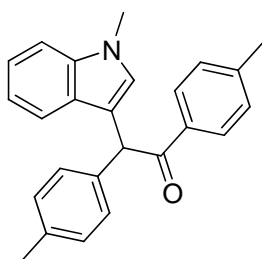

**3a3**, 2-(1-methyl-1*H*-indol-3-yl)-1,2-di-*p*-tolylethanone, white solid: mp 94-95 °C. <sup>1</sup>H NMR (400 MHz, CDCl<sub>3</sub>) δ = 2.29 (s, 3H), 2.37 (s, 3H), 3.71 (s, 3H), 6.22 (s, 1H), 6.87 (s, 1H), 7.05-7.11 (m, 3H), 7.19-7.29 (m, 6H), 7.48 (d, *J* = 7.9 Hz, 1H), 7.96 (d, *J* = 8.2 Hz, 2H); <sup>13</sup>C NMR (100 MHz, CDCl<sub>3</sub>) δ = 198.2, 143.7, 137.2, 136.5, 136.2, 134.4, 129.3, 129.2, 129.0, 128.8, 128.4, 127.0, 121.8, 119.2, 118.9, 113.1, 109.4, 50.0, 32.8, 21.6, 21.1; HRMS (ESI-TOF) Calcd for C<sub>25</sub>H<sub>24</sub>NO<sup>+</sup> ([M+H]<sup>+</sup>) 354.1852. Found 354.1849.

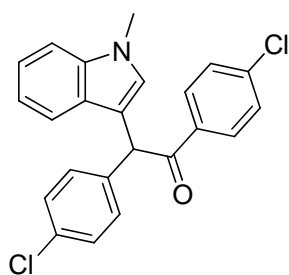

**3a4**, 1,2-bis(4-chlorophenyl)-2-(1-methyl-1*H*-indol-3-yl)ethanone, white solid: mp 110-112 °C. <sup>1</sup>H NMR (400 MHz, DMSO) δ = 3.72 (s, 3H), 6.57 (s, 1H), 7.02 (ddd, *J* = 0.8, 7.0, 7.9 Hz, 1H), 7.13-7.17 (m, 2H), 7.34-7.40 (m, 5H), 7.54-7.57 (m, 3H), 8.09 (ddd, *J* = 2.4, 1.9, 8.7 Hz, 2H); <sup>13</sup>C NMR (100 MHz, DMSO) δ = 197.0, 138.9, 138.6, 137.2, 135.3, 131.8, 131.4, 131.0, 129.3, 128.9, 128.5, 126.8, 122.0, 119.5, 119.2, 111.7, 110.3, 49.1, 32.9; HRMS (ESI-TOF) Calcd for C<sub>23</sub>H<sub>18</sub>Cl<sub>2</sub>NO<sup>+</sup> ([M+H]<sup>+</sup>) 394.0760. Found 394.0762.

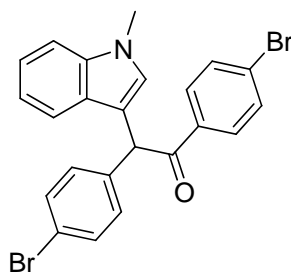

**3a5**, 1,2-bis(4-bromophenyl)-2-(1-methyl-1*H*-indol-3-yl)ethanone, pale yellow solid: mp 134-135 °C. <sup>1</sup>H NMR (400 MHz, DMSO) δ = 3.72 (s, 3H), 6.55 (s, 1H), 7.02 (dd, *J* = 7.4, 7.5 Hz, 1H), 7.13-7.17 (m, 2H), 7.33 (d, *J* = 8.4 Hz, 2H), 7.39 (d, *J* = 8.2 Hz, 1H), 7.49 (d, *J* = 8.4 Hz, 2H), 7.55 (d, *J* = 7.9 Hz, 1H), 7.69 (d, *J* = 8.5 Hz, 2H), 8.01 (d, *J* = 8.5 Hz, 2H); <sup>13</sup>C NMR (100 MHz, DMSO) δ = 197.2, 139.3, 137.2, 135.6, 132.2, 131.8, 131.4, 131.1, 128.9, 127.8, 126.8, 122.1, 120.4, 119.5, 119.2, 111.6, 110.3, 49.1, 32.9; HRMS (ESI-TOF) Calcd for C<sub>23</sub>H<sub>18</sub>Br<sub>2</sub>NO<sup>+</sup> ([M+H]<sup>+</sup>) 481.9750. Found 481.9756.

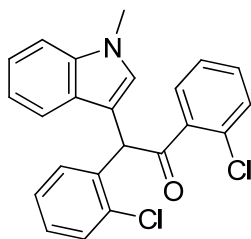

**3a6**, 1,2-bis(2-chlorophenyl)-2-(1-methyl-1*H*-indol-3-yl)ethanone, white solid: mp 142-143 °C. <sup>1</sup>H NMR (400 MHz, DMSO)  $\delta$  = 3.77 (s, 3H), 6.59 (s, 1H), 7.02 (ddd,  $J$  = 0.8, 7.1, 7.9 Hz, 1H), 7.14-7.19 (m, 2H), 7.23-7.31 (m, 2H), 7.33 (s, 1H), 7.37-7.50 (m, 6H), 7.92 (dd,  $J$  = 1.6, 7.9 Hz, 1H); <sup>13</sup>C NMR (100 MHz, DMSO)  $\delta$  = 197.8, 137.9, 137.2, 137.0, 133.5, 133.0, 131.4, 131.33, 131.29, 130.0, 129.8, 129.6, 129.3, 127.7, 127.5, 127.2, 122.1, 119.7, 119.0, 110.5, 108.5, 50.9, 33.0; HRMS (ESI-TOF) Calcd for C<sub>23</sub>H<sub>18</sub>Cl<sub>2</sub>NO<sup>+</sup> ([M+H]<sup>+</sup>) 394.0760. Found 394.0762.

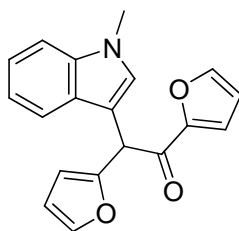

**3a7**, 1,2-di(furan-2-yl)-2-(1-methyl-1*H*-indol-3-yl)ethanone, yellow solid: mp 124-125 °C. <sup>1</sup>H NMR (400 MHz, CDCl<sub>3</sub>)  $\delta$  = 3.75 (s, 3H), 6.13 (s, 1H), 6.20 (d,  $J$  = 3.2 Hz, 1H), 6.31 (dd,  $J$  = 1.9, 3.2 Hz, 1H), 6.50 (dd,  $J$  = 1.7, 3.6 Hz, 1H), 7.10-7.14 (m, 2H), 7.23 (ddd,  $J$  = 1.0, 7.2, 8.1 Hz, 1H), 7.28-7.31 (m, 2H), 7.38 (dd,  $J$  = 0.6, 1.6 Hz, 1H), 7.57 (d,  $J$  = 1.1 Hz, 1H), 7.65 (d,  $J$  = 8.0 Hz, 1H); <sup>13</sup>C NMR (100 MHz, CDCl<sub>3</sub>)  $\delta$  = 184.9, 152.3, 151.9, 146.8, 142.1, 137.0, 128.5, 127.0, 121.9, 119.5, 119.1, 118.4, 112.5, 110.4, 109.5, 108.9, 108.4, 44.4, 32.9; HRMS (ESI-TOF) Calcd for C<sub>19</sub>H<sub>16</sub>NO<sub>3</sub><sup>+</sup> ([M+H]<sup>+</sup>) 306.1125. Found 306.1127.

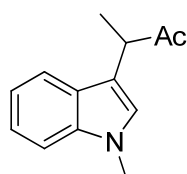

**3a8**, 3-(1-methyl-1*H*-indol-3-yl)butan-2-one, yellow oil. <sup>1</sup>H NMR (400 MHz, CDCl<sub>3</sub>)  $\delta$  = 1.39 (d,  $J$  = 7.0 Hz, 3H), 1.98 (s, 3H), 3.65 (s, 3H), 3.90 (q,  $J$  = 7.0 Hz, 1H), 6.83 (s, 1H), 7.03 (dd,  $J$  = 7.1, 7.8 Hz, 1H), 7.14 (dd,  $J$  = 7.3, 7.5 Hz, 1H), 7.20 (d,  $J$  = 8.2 Hz, 1H), 7.48 (d,  $J$  = 8.0 Hz, 1H); <sup>13</sup>C NMR (100 MHz, CDCl<sub>3</sub>)  $\delta$  = 208.8,

136.1, 125.8, 125.5, 120.9, 118.2, 118.0, 112.9, 108.4, 43.8, 31.7, 26.6, 15.7; HRMS (ESI-TOF) Calcd for  $C_{13}H_{16}NO^+$  ( $[M+H]^+$ ) 202.1226. Found 202.1231.

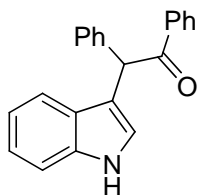

**3b1**, 2-(1*H*-indol-3-yl)-1,2-diphenylethanone, white semi-solid.  $^1H$  NMR (400 MHz,  $CDCl_3$ )  $\delta$  = 6.27 (s, 1H), 6.89 (s, 1H), 7.07 (dd,  $J$  = 6.8, 6.8 Hz, 1H), 7.16 (dd,  $J$  = 7.2, 7.0 Hz, 1H), 7.22-7.40 (m, 8H), 7.48 (d,  $J$  = 4.7 Hz, 2H), 8.04 (d,  $J$  = 5.2 Hz, 2H), 8.15 (bs, 1H);  $^{13}C$  NMR (100 MHz,  $CDCl_3$ )  $\delta$  = 198.6, 138.9, 136.9, 136.5, 133.1, 129.1, 128.9, 128.7, 128.6, 127.1, 126.6, 124.0, 122.4, 119.8, 118.8, 114.3, 111.5, 50.8; HRMS (ESI-TOF) Calcd for  $C_{22}H_{18}NO^+$  ( $[M+H]^+$ ) 312.1383. Found 312.1387.

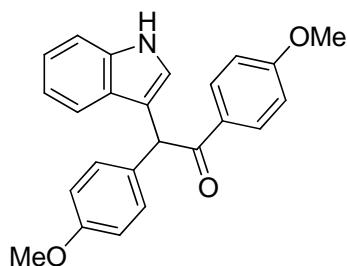

**3b2**, 2-(1*H*-indol-3-yl)-1,2-bis(4-methoxyphenyl)ethanone, white solid: mp 171-173 °C.  $^1H$  NMR (400 MHz,  $CDCl_3$ )  $\delta$  = 3.75 (s, 3H), 3.82 (s, 3H), 6.17 (s, 1H), 6.83 (ddd,  $J$  = 3.0, 2.0, 8.7 Hz, 2H), 6.87 (ddd,  $J$  = 2.9, 2.0, 9.0 Hz, 2H), 6.97 (d,  $J$  = 1.5 Hz, 1H), 7.07 (ddd,  $J$  = 0.9, 7.1, 8.0 Hz, 1H), 7.17 (ddd,  $J$  = 1.0, 7.1, 8.0 Hz, 1H), 7.27 (ddd,  $J$  = 3.0, 2.0, 8.7 Hz, 2H), 7.33 (d,  $J$  = 8.2 Hz, 1H), 7.47 (d,  $J$  = 8.0 Hz, 1H), 8.04 (ddd,  $J$  = 2.9, 2.0, 9.0 Hz, 2H), 8.09 (bs, 1H);  $^{13}C$  NMR (125 MHz,  $CDCl_3$ )  $\delta$  = 197.3, 163.4, 158.6, 136.4, 131.3, 131.2, 130.0, 129.8, 126.6, 123.7, 122.3, 119.7, 118.8, 115.0, 114.0, 113.8, 111.3, 55.5, 55.2, 49.5; HRMS (ESI-TOF) Calcd for  $C_{24}H_{22}NO_3^+$  ( $[M+H]^+$ ) 372.1594. Found 372.1596.

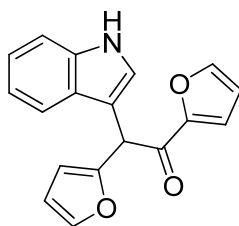

**3b3**, 1,2-di(furan-2-yl)-2-(1*H*-indol-3-yl)ethanone, dark brown semi-solid.  $^1H$  NMR

(400 MHz, CDCl<sub>3</sub>)  $\delta$  = 6.01 (s, 1H), 6.06 (d,  $J$  = 3.2 Hz, 1H), 6.16 (dd,  $J$  = 1.8, 2.9 Hz, 1H), 6.29 (dd,  $J$  = 1.5, 3.4 Hz, 1H), 6.97-7.06 (m, 3H), 7.11-7.16 (m, 2H), 7.23 (d,  $J$  = 0.7 Hz, 1H), 7.37 (d,  $J$  = 0.7 Hz, 1H), 7.53 (d,  $J$  = 7.7 Hz, 1H), 8.35 (bs, 1H); <sup>13</sup>C NMR (100 MHz, CDCl<sub>3</sub>)  $\delta$  = 184.1, 151.1, 150.7, 145.9, 141.1, 135.2, 125.4, 123.1, 121.2, 118.8, 117.8, 117.7, 111.4, 110.5, 109.4, 109.1, 107.6, 43.7; HRMS (ESI-TOF) Calcd for C<sub>18</sub>H<sub>14</sub>NO<sub>3</sub><sup>+</sup> ([M+H]<sup>+</sup>) 292.0968. Found 292.0970.

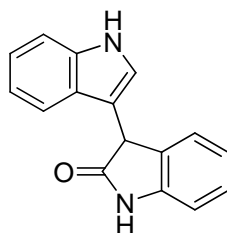

**3c**, 3-(1*H*-indol-3-yl)indolin-2-one, brown solid: mp 122-123 °C. <sup>1</sup>H NMR (400 MHz, DMSO)  $\delta$  = 4.91 (s, 1H), 6.84-6.95 (m, 3H), 7.01-7.06 (m, 3H), 7.21 (dd,  $J$  = 7.1, 6.7 Hz, 1H), 7.28 (s, 1H), 7.37 (d,  $J$  = 7.8 Hz, 1H), 10.56 (bs, 1H), 11.03 (bs, 1H); <sup>13</sup>C NMR (100 MHz, DMSO)  $\delta$  = 178.2, 143.0, 137.0, 130.9, 128.3, 126.5, 124.9, 124.9, 121.9, 121.6, 119.0, 119.0, 112.1, 110.5, 109.7, 44.9; HRMS (ESI-TOF) Calcd for C<sub>16</sub>H<sub>13</sub>N<sub>2</sub>O<sup>+</sup> ([M+H]<sup>+</sup>) 249.1022. Found 249.1017.

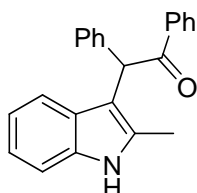

**3d1**, 2-(2-methyl-1*H*-indol-3-yl)-1,2-diphenylethanone, white crystal: 153-154 °C. <sup>1</sup>H NMR (400 MHz, CDCl<sub>3</sub>)  $\delta$  = 2.20 (s, 3H), 6.10 (s, 1H), 6.94-7.03 (m, 2H), 7.11-7.24 (m, 8H), 7.36 (dd,  $J$  = 7.4, 7.3 Hz, 1H), 7.44 (d,  $J$  = 7.7 Hz, 1H), 7.81 (bs, 1H), 7.91 (d,  $J$  = 7.4 Hz, 2H); <sup>13</sup>C NMR (100 MHz, CDCl<sub>3</sub>)  $\delta$  = 197.7, 138.2, 136.1, 134.2, 131.8, 131.7, 128.1, 127.5, 127.4, 127.2, 127.0, 125.7, 120.3, 118.8, 117.6, 109.3, 107.5, 49.7, 11.4; HRMS (ESI-TOF) Calcd for C<sub>23</sub>H<sub>20</sub>NO<sup>+</sup> ([M+H]<sup>+</sup>) 326.1539. Found 326.1533.



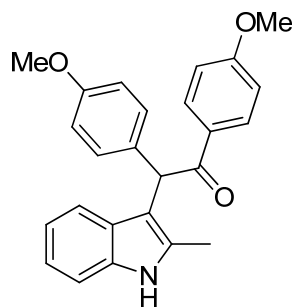

**3d2**, 1,2-bis(4-methoxyphenyl)-2-(2-methyl-1*H*-indol-3-yl)ethanone, orange solid: mp 138-139 °C (dec.). <sup>1</sup>H NMR (400 MHz, CDCl<sub>3</sub>) δ = 2.32 (s, 3H), 3.76 (s, 3H), 3.79 (s, 3H), 6.08 (s, 1H), 6.79-6.84 (m, 4H), 7.02-7.16 (m, 4H), 7.25 (d, *J* = 8.0 Hz, 1H), 7.51 (d, *J* = 7.9 Hz, 1H), 7.86 (bs, 1H), 7.97 (ddd, *J* = 2.8, 2.0, 9.0 Hz, 2H); <sup>13</sup>C NMR (100 MHz, CDCl<sub>3</sub>) δ = 197.6, 163.2, 158.3, 135.2, 132.5, 131.7, 130.9, 130.1, 130.1, 128.1, 121.3, 119.8, 118.7, 113.7, 113.6, 110.3, 109.4, 55.4, 55.2, 49.7, 12.5; HRMS (ESI-TOF) Calcd for C<sub>25</sub>H<sub>24</sub>NO<sub>3</sub><sup>+</sup> ([M+H]<sup>+</sup>) 386.1751. Found 386.1753.

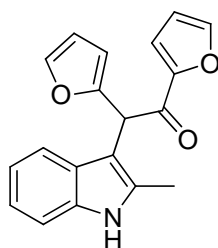

**3d3**, 1,2-di(furan-2-yl)-2-(2-methyl-1*H*-indol-3-yl)ethanone, yellow solid: mp 184-185 °C. <sup>1</sup>H NMR (400 MHz, CDCl<sub>3</sub>) δ = 2.49 (s, 3H), 6.04 (s, 1H), 6.15 (d, *J* = 3.2 Hz, 1H), 6.30 (dd, *J* = 1.8, 3.2 Hz, 1H), 6.43 (dd, *J* = 1.7, 3.6 Hz, 1H), 7.06-7.13 (m, 2H), 7.16 (dd, *J* = 0.6, 3.6 Hz, 1H), 7.25-7.27 (m, 1H), 7.39 (d, *J* = 1.4 Hz, 1H), 7.49 (dd, *J* = 0.6, 1.6 Hz, 1H), 7.65 (dd, *J* = 1.3, 7.5 Hz, 1H), 7.97 (bs, 1H); <sup>13</sup>C NMR (100 MHz, CDCl<sub>3</sub>) δ = 184.4, 152.2, 151.9, 146.2, 141.9, 135.1, 133.6, 127.7, 121.4, 119.9, 119.2, 117.6, 112.3, 110.2, 108.8, 105.7, 44.6, 12.3; HRMS (ESI-TOF) Calcd for C<sub>19</sub>H<sub>16</sub>NO<sub>3</sub><sup>+</sup> ([M+H]<sup>+</sup>) 306.1125. Found 306.1120.

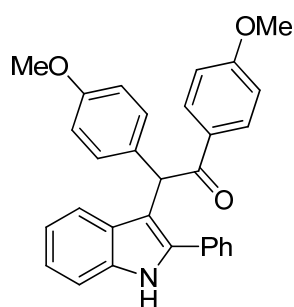

**3e**, 1,2-bis(4-methoxyphenyl)-2-(2-phenyl-1*H*-indol-3-yl)ethanone, yellow solid: mp

228-230 °C.  $^1\text{H}$  NMR (400 MHz, DMSO)  $\delta$  = 3.70 (s, 3H), 3.74 (s, 3H), 6.15 (s, 1H), 6.73-6.77 (m, 2H), 6.86-6.93 (m, 3H), 7.05 (ddd,  $J$  = 1.0, 7.0, 7.1 Hz, 1H), 7.14-7.17 (m, 2H), 7.32-7.35 (m, 2H), 7.45-7.50 (m, 3H), 7.53-7.59 (m, 4H), 11.53 (bs, 1H);  $^{13}\text{C}$  NMR (100 MHz, DMSO)  $\delta$  = 196.8, 163.1, 158.3, 136.7, 136.5, 132.7, 132.6, 130.7, 130.6, 129.6, 129.4, 128.64, 128.60, 127.9, 121.9, 120.4, 119.8, 113.98, 113.95, 111.9, 108.8, 55.8, 55.4, 50.2; HRMS (ESI-TOF) Calcd for  $\text{C}_{30}\text{H}_{26}\text{NO}_3^+$  ( $[\text{M}+\text{H}]^+$ ) 448.1907. Found 448.1908.

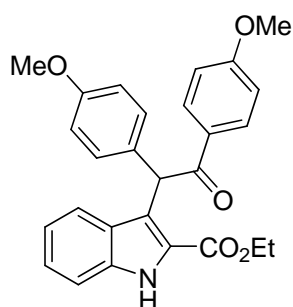

**3f**, ethyl 3-(1,2-bis(4-methoxyphenyl)-2-oxoethyl)-1H-indole-2-carboxylate, pink solid: mp 138-139 °C.  $^1\text{H}$  NMR (400 MHz,  $\text{CDCl}_3$ )  $\delta$  = 1.38 (t,  $J$  = 7.0 Hz, 3H), 3.75 (s, 3H), 3.79 (s, 3H), 4.38-4.46 (m, 2H), 6.82 (dd,  $J$  = 3.8, 8.5 Hz, 4H), 7.01 (dd,  $J$  = 7.0, 7.8 Hz, 1H), 7.16 (s, 1H), 7.24 (d,  $J$  = 8.1 Hz, 3H), 7.30 (d,  $J$  = 8.2 Hz, 1H), 7.55 (d,  $J$  = 8.0 Hz, 1H), 8.07 (d,  $J$  = 8.7 Hz, 2H), 8.91 (bs, 1H);  $^{13}\text{C}$  NMR (100 MHz,  $\text{CDCl}_3$ )  $\delta$  = 197.5, 163.2, 161.9, 158.3, 136.1, 131.5, 131.1, 130.3, 130.0, 127.2, 125.5, 123.1, 123.1, 121.6, 120.7, 113.8, 113.7, 111.8, 61.1, 55.4, 55.2, 49.8, 14.4; HRMS (ESI-TOF) Calcd for  $\text{C}_{27}\text{H}_{26}\text{NO}_5^+$  ( $[\text{M}+\text{H}]^+$ ) 444.1805. Found 444.1803.

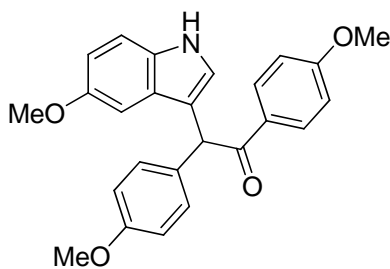

**3g1**, 2-(5-methoxy-1H-indol-3-yl)-1,2-bis(4-methoxyphenyl)ethanone, white solid: mp 157-158 °C.  $^1\text{H}$  NMR (400 MHz, DMSO)  $\delta$  = 3.69 (s, 3H), 3.70 (s, 3H), 3.79 (s, 3H), 6.36 (s, 1H), 6.72 (dd,  $J$  = 2.4, 8.8 Hz, 1H), 6.84 (d,  $J$  = 8.7 Hz, 2H), 6.99 (d,  $J$  = 9.0 Hz, 2H), 7.04 (d,  $J$  = 2.4 Hz, 1H), 7.08 (d,  $J$  = 2.4 Hz, 1H), 7.23 (d,  $J$  = 8.7 Hz, 1H), 7.31 (d,  $J$  = 8.7 Hz, 2H), 8.09 (d,  $J$  = 8.9 Hz, 2H), 10.82 (d,  $J$  = 2.0 Hz, 1H);  $^{13}\text{C}$  NMR (100 MHz, DMSO)  $\delta$  = 197.2, 163.4, 158.3, 153.6, 132.4, 131.8, 131.4, 130.4,

129.7, 127.1, 125.0, 114.3, 113.9, 113.6, 112.6, 111.4, 101.3, 55.9, 55.8, 55.4, 48.6; HRMS (ESI-TOF) Calcd for  $C_{25}H_{24}NO_4^+$  ( $[M+H]^+$ ) 402.1700. Found 402.1703.

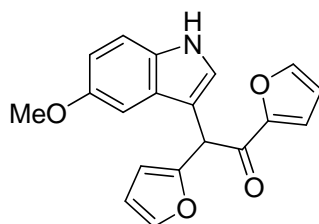

**3g2**, 1,2-di(furan-2-yl)-2-(5-methoxy-1*H*-indol-3-yl)ethanone, brown semi-solid.  $^1H$  NMR (400 MHz,  $CDCl_3$ )  $\delta$  = 3.82 (s, 3H), 6.07 (s, 1H), 6.19 (s, 1H), 6.31 (s, 1H), 6.49 (s, 1H), 6.85 (d,  $J$  = 8.0 Hz, 1H), 7.08 (s, 1H), 7.21-7.26 (m, 3H), 7.38 (s, 1H), 7.56 (s, 1H), 8.16 (bs, 1H);  $^{13}C$  NMR (100 MHz,  $CDCl_3$ )  $\delta$  = 184.8, 154.3, 152.1, 151.9, 146.7, 142.1, 131.4, 127.0, 124.6, 118.4, 112.6, 112.5, 112.1, 110.5, 110.3, 108.6, 101.0, 55.9, 44.8; HRMS (ESI-TOF) Calcd for  $C_{19}H_{16}NO_4^+$  ( $[M+H]^+$ ) 322.1074. Found 322.1078.

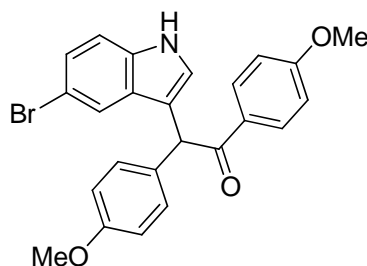

**3h1**, 2-(5-bromo-1*H*-indol-3-yl)-1,2-bis(4-methoxyphenyl)ethanone, white solid: 212-213 °C.  $^1H$  NMR (400 MHz, DMSO)  $\delta$  = 3.69 (s, 3H), 3.81 (s, 3H), 6.44 (s, 1H), 6.85 (d,  $J$  = 8.7 Hz, 2H), 7.00 (d,  $J$  = 8.9 Hz, 2H), 7.15-7.20 (m, 2H), 7.28-7.32 (m, 3H), 7.72 (d,  $J$  = 1.7 Hz, 1H), 8.11 (d,  $J$  = 8.9 Hz, 2H), 11.19 (bs, 1H);  $^{13}C$  NMR (100 MHz, DMSO)  $\delta$  = 197.0, 163.5, 158.4, 135.3, 132.2, 131.5, 130.3, 129.5, 128.6, 126.0, 124.1, 121.5, 114.3, 114.08, 114.00, 113.9, 111.7, 55.9, 55.4, 48.2; HRMS (ESI-TOF) Calcd for  $C_{24}H_{21}BrNO_3^+$  ( $[M+H]^+$ ) 450.0699. Found 450.0692.

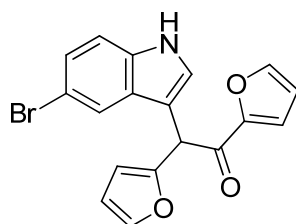

**3h2**, 2-(5-bromo-1*H*-indol-3-yl)-1,2-di(furan-2-yl)ethanone, dark brown semi-solid.

$^1\text{H}$  NMR (400 MHz,  $\text{CDCl}_3$ )  $\delta$  = 5.99 (s, 1H), 6.09 (d,  $J$  = 3.1 Hz, 1H), 6.22 (dd,  $J$  = 1.8, 2.8 Hz, 1H), 6.43 (dd,  $J$  = 1.5, 3.4 Hz, 1H), 7.08-7.18 (m, 4H), 7.21 (d,  $J$  = 3.5 Hz, 1H), 7.29 (d,  $J$  = 0.6 Hz, 1H), 7.50 (s, 1H), 7.67 (s, 1H), 8.38 (bs, 1H);  $^{13}\text{C}$  NMR (100 MHz,  $\text{CDCl}_3$ )  $\delta$  = 183.7, 150.6, 150.6, 146.0, 141.3, 133.8, 127.2, 124.2, 120.4, 117.8, 112.2, 111.9, 111.6, 109.5, 109.2, 107.5, 43.3; HRMS (ESI-TOF) Calcd for  $\text{C}_{18}\text{H}_{13}\text{BrNO}_3^+$  ( $[\text{M}+\text{H}]^+$ ) 370.0073. Found 370.0076.

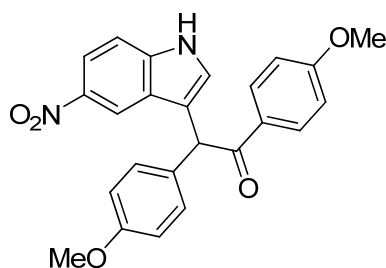

**3i1**, 1,2-bis(4-methoxyphenyl)-2-(5-nitro-1*H*-indol-3-yl)ethanone, yellow solid: mp 169-170 °C.  $^1\text{H}$  NMR (400 MHz, DMSO)  $\delta$  = 3.69 (s, 3H), 3.81 (s, 3H), 6.61 (s, 1H), 6.87 (ddd,  $J$  = 3.0, 2.0, 8.8 Hz, 2H), 7.01 (ddd,  $J$  = 2.9, 2.0, 9.0 Hz, 2H), 7.33 (ddd,  $J$  = 2.9, 2.0, 8.8 Hz, 2H), 7.40 (d,  $J$  = 2.1 Hz, 1H), 7.52 (d,  $J$  = 9.0 Hz, 1H), 7.98 (dd,  $J$  = 2.3, 9.0 Hz, 1H), 8.15 (ddd,  $J$  = 2.9, 2.0, 9.0 Hz, 2H), 8.57 (d,  $J$  = 2.2 Hz, 1H), 11.73 (bs, 1H);  $^{13}\text{C}$  NMR (100 MHz, DMSO)  $\delta$  = 196.9, 163.6, 158.5, 140.8, 139.8, 131.9, 131.7, 130.3, 129.3, 128.4, 126.2, 117.2, 117.1, 116.7, 114.4, 114.3, 112.5, 56.0, 55.4, 48.1; HRMS (ESI-TOF) Calcd for  $\text{C}_{24}\text{H}_{21}\text{N}_2\text{O}_5^+$  ( $[\text{M}+\text{H}]^+$ ) 417.1445. Found 417.1449.

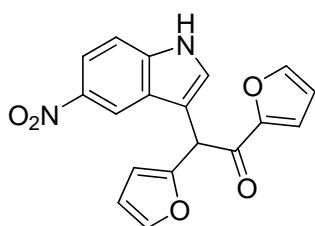

**3i2**, 1,2-di(furan-2-yl)-2-(5-nitro-1*H*-indol-3-yl)ethanone, orange semi-solid.  $^1\text{H}$  NMR (400 MHz,  $\text{CDCl}_3$ )  $\delta$  = 6.20 (s, 1H), 6.24 (d,  $J$  = 3.2 Hz, 1H), 6.33 (dd,  $J$  = 1.8, 3.2 Hz, 1H), 6.57 (dd,  $J$  = 1.7, 3.6 Hz, 1H), 7.34-7.39 (m, 4H), 7.64 (dd,  $J$  = 0.6, 1.6 Hz, 1H), 8.06 (dd,  $J$  = 2.2, 9.0 Hz, 1H), 8.59 (d,  $J$  = 2.2 Hz, 1H), 9.03 (bs, 1H);  $^{13}\text{C}$  NMR (100 MHz,  $\text{CDCl}_3$ )  $\delta$  = 184.5, 151.5, 150.9, 147.4, 142.6, 141.8, 139.2, 127.3, 125.9, 119.3, 117.9, 116.2, 113.1, 112.9, 111.6, 110.7, 108.6, 44.1; HRMS (ESI-TOF) Calcd for  $\text{C}_{18}\text{H}_{13}\text{N}_2\text{O}_5^+$  ( $[\text{M}+\text{H}]^+$ ) 337.0819. Found 337.0823.

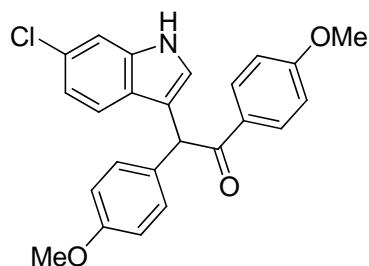

**3j1**, 2-(6-chloro-1*H*-indol-3-yl)-1,2-bis(4-methoxyphenyl)ethanone, pale red solid: mp 124-125 °C. <sup>1</sup>H NMR (400 MHz, DMSO)  $\delta$  = 3.69 (s, 3H), 3.79 (s, 3H), 6.40 (s, 1H), 6.85 (d,  $J$  = 8.7 Hz, 2H), 6.96-7.01 (m, 3H), 7.14 (d,  $J$  = 2.3 Hz, 1H), 7.29 (d,  $J$  = 8.6 Hz, 2H), 7.40 (d,  $J$  = 1.8 Hz, 1H), 7.49 (d,  $J$  = 8.5 Hz, 1H), 8.09 (d,  $J$  = 8.9 Hz, 2H), 11.13 (bs, 1H); <sup>13</sup>C NMR (100 MHz, DMSO)  $\delta$  = 197.1, 163.5, 158.4, 137.0, 132.1, 131.5, 130.4, 129.5, 126.4, 125.6, 125.6, 120.6, 119.4, 114.6, 114.4, 114.1, 111.6, 56.0, 55.4, 48.5; HRMS (ESI-TOF) Calcd for C<sub>24</sub>H<sub>21</sub>ClNO<sub>3</sub><sup>+</sup> ([M+H]<sup>+</sup>) 406.1204. Found 406.1201.

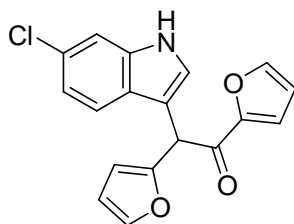

**3j2**, 2-(6-chloro-1*H*-indol-3-yl)-1,2-di(furan-2-yl)ethanone, yellow semi-solid. <sup>1</sup>H NMR (400 MHz, DMSO)  $\delta$  = 6.16 (s, 1H), 6.27 (s, 1H), 6.38 (s, 1H), 6.70 (d,  $J$  = 1.6 Hz, 1H), 7.03 (d,  $J$  = 8.3 Hz, 1H), 7.44 (s, 2H), 7.59 (s, 1H), 7.63 (d,  $J$  = 8.4 Hz, 1H), 7.74 (d,  $J$  = 2.9 Hz, 1H), 7.99 (s, 1H), 11.30 (bs, 1H); <sup>13</sup>C NMR (100 MHz, DMSO)  $\delta$  = 184.4, 152.8, 151.2, 149.0, 142.9, 137.1, 126.6, 126.5, 125.4, 121.0, 120.6, 119.7, 113.2, 111.8, 110.9, 110.0, 108.6, 44.7; HRMS (ESI-TOF) Calcd for C<sub>18</sub>H<sub>13</sub>ClNO<sub>3</sub><sup>+</sup> ([M+H]<sup>+</sup>) 326.0578. Found 326.0572.

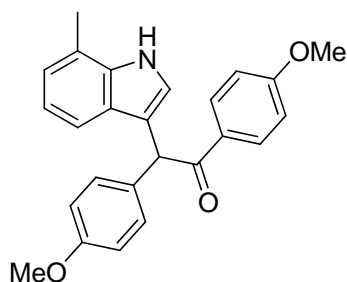

**3k1**, 1,2-bis(4-methoxyphenyl)-2-(7-methyl-1*H*-indol-3-yl)ethanone, white solid: 70-71 °C (dec.). <sup>1</sup>H NMR (400 MHz, CDCl<sub>3</sub>)  $\delta$  = 2.46 (s, 3H), 3.76 (s, 3H), 3.83 (s,

3H), 6.17 (s, 1H), 6.81-6.89 (m, 4H), 6.98-7.03 (m, 3H), 7.25-7.28 (m, 2H), 7.34 (dd,  $J = 2.1, 6.7$  Hz, 1H), 8.04 (d,  $J = 8.9$  Hz, 2H), 8.07 (bs, 1H);  $^{13}\text{C}$  NMR (100 MHz,  $\text{CDCl}_3$ )  $\delta = 197.2, 163.3, 158.6, 136.0, 131.4, 131.2, 130.0, 129.9, 126.2, 123.3, 122.9, 120.4, 120.0, 116.6, 115.7, 113.9, 113.8, 55.4, 55.2, 49.6, 16.6$ ; HRMS (ESI-TOF) Calcd for  $\text{C}_{25}\text{H}_{24}\text{NO}_3^+$  ( $[\text{M}+\text{H}]^+$ ) 386.1751. Found 386.1752.

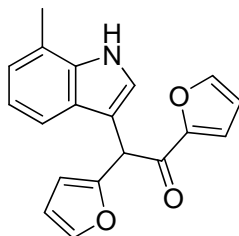

**3k2**, 1,2-di(furan-2-yl)-2-(7-methyl-1*H*-indol-3-yl)ethanone, dark brown semi-solid.  $^1\text{H}$  NMR (400 MHz,  $\text{CDCl}_3$ )  $\delta = 2.30$  (s, 3H), 6.02 (s, 1H), 6.07 (d,  $J = 2.9$  Hz, 1H), 6.18 (s, 1H), 6.33 (dd,  $J = 1.4, 3.3$  Hz, 1H), 6.88 (d,  $J = 7.0$  Hz, 1H), 6.94 (dd,  $J = 7.7, 7.3$  Hz, 1H), 7.07 (d,  $J = 2.0$  Hz, 1H), 7.15 (d,  $J = 3.4$  Hz, 1H), 7.25 (s, 1H), 7.40 (d,  $J = 7.6$  Hz, 1H), 7.41 (s, 1H), 8.23 (bs, 1H);  $^{13}\text{C}$  NMR (100 MHz,  $\text{CDCl}_3$ )  $\delta = 184.0, 151.2, 150.8, 145.8, 141.1, 134.7, 125.0, 122.7, 121.8, 119.7, 119.0, 117.5, 115.5, 111.4, 109.8, 109.4, 107.5, 43.7, 15.4$ ; HRMS (ESI-TOF) Calcd for  $\text{C}_{19}\text{H}_{16}\text{NO}_3^+$  ( $[\text{M}+\text{H}]^+$ ) 306.1125. Found 306.1127.

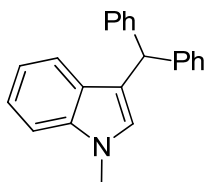

**5a**, 3-benzhydryl-1-methyl-1*H*-indole, white crystal: 147-148 °C.  $^1\text{H}$  NMR (400 MHz, DMSO)  $\delta = 3.70$  (s, 3H), 5.69 (s, 1H), 6.71 (s, 1H), 6.90 (dd,  $J = 6.9, 6.9$  Hz, 1H), 7.12 (dd,  $J = 7.3, 7.3$  Hz, 2H), 7.18-7.31 (m, 10H), 7.39 (d,  $J = 7.8$  Hz, 1H);  $^{13}\text{C}$  NMR (100 MHz, DMSO)  $\delta = 144.7, 137.6, 129.1, 128.9, 128.7, 127.3, 126.6, 121.7, 119.7, 118.9, 117.6, 110.1, 48.5, 32.7$ ; HRMS (ESI-TOF) Calcd for  $\text{C}_{22}\text{H}_{20}\text{N}^+$  ( $[\text{M}+\text{H}]^+$ ) 298.1590. Found 298.1592.

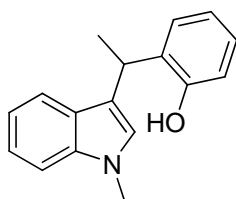

**5b**, 2-(1-(1-methyl-1*H*-indol-3-yl)ethyl)phenol, yellow oil.  $^1\text{H}$  NMR (400 MHz,

CDCl<sub>3</sub>)  $\delta$  = 1.71 (d,  $J$  = 7.2 Hz, 3H), 3.72 (s, 3H), 4.50 (q,  $J$  = 7.1 Hz, 1H), 5.20 (s, 1H), 6.75 (dd,  $J$  = 1.1, 8.0 Hz, 1H), 6.88 (s, 1H), 6.92 (ddd,  $J$  = 1.2, 7.5, 7.4 Hz, 1H), 7.00 (ddd,  $J$  = 0.9, 7.0, 7.0 Hz, 1H), 7.12 (ddd,  $J$  = 1.6, 7.8, 7.6 Hz, 1H), 7.18-7.22 (m, 1H), 7.26-7.30 (m, 2H), 7.37 (d,  $J$  = 8.0 Hz, 1H); <sup>13</sup>C NMR (100 MHz, CDCl<sub>3</sub>)  $\delta$  = 154.2, 137.8, 131.6, 128.3, 127.6, 127.1, 126.1, 122.2, 120.8, 119.8, 119.2, 117.8, 116.4, 109.4, 32.8, 32.2, 20.5; HRMS (ESI-TOF) Calcd for C<sub>17</sub>H<sub>18</sub>NO<sup>+</sup> ([M+H]<sup>+</sup>) 252.1383. Found 252.1382.

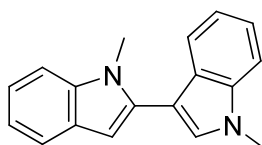

7, 1,1'-dimethyl-1*H*,1'*H*-2,3'-biindole, white solid: 130-131 °C. <sup>1</sup>H NMR (400 MHz, CDCl<sub>3</sub>)  $\delta$  = 3.76 (s, 3H), 3.89 (s, 3H), 6.62 (s, 1H), 7.13-7.23 (m, 4H), 7.32 (dd,  $J$  = 7.5, 6.8 Hz, 1H), 7.37-7.42 (m, 2H), 7.64 (d,  $J$  = 7.5 Hz, 1H), 7.70 (d,  $J$  = 7.4 Hz, 1H); <sup>13</sup>C NMR (100 MHz, CDCl<sub>3</sub>)  $\delta$  = 138.0, 137.0, 135.1, 128.4, 127.7, 122.4, 121.0, 120.4, 120.2, 120.0, 119.6, 109.6, 109.4, 107.4, 101.4, 33.0, 31.0; HRMS (ESI-TOF) Calcd for C<sub>18</sub>H<sub>17</sub>N<sub>2</sub><sup>+</sup> ([M+H]<sup>+</sup>) 261.1386. Found 261.1401.

## IV. Copies of NMR spectra for all products

### 3a1

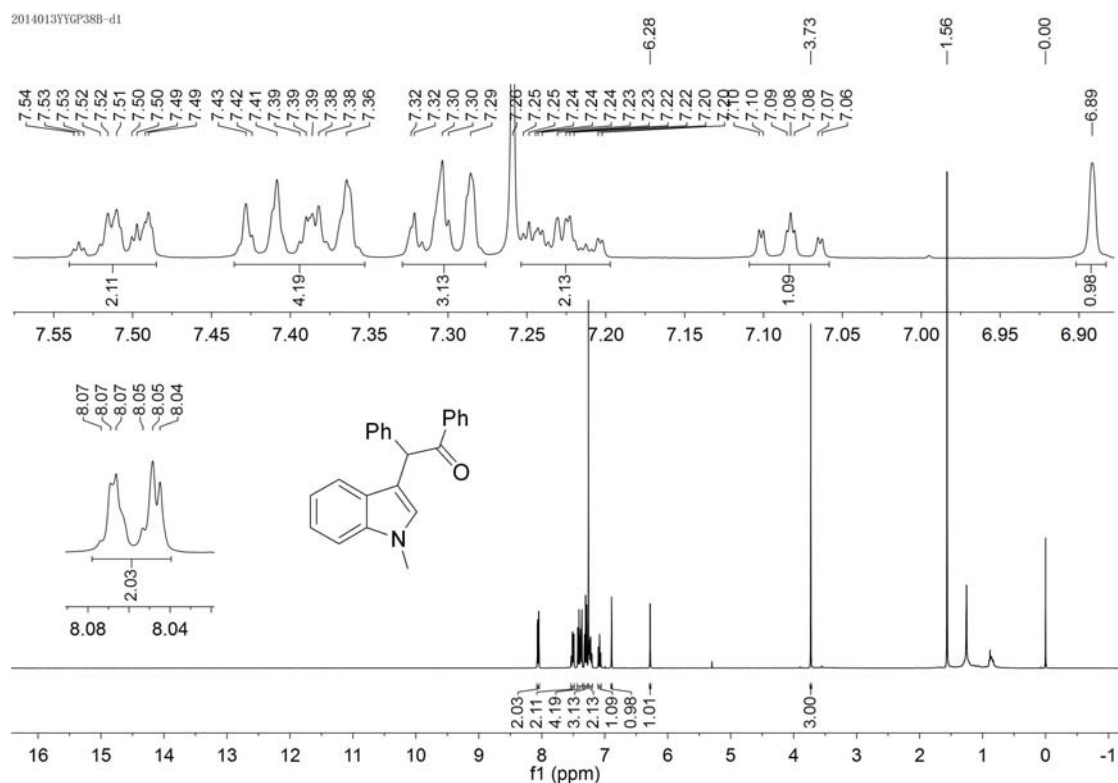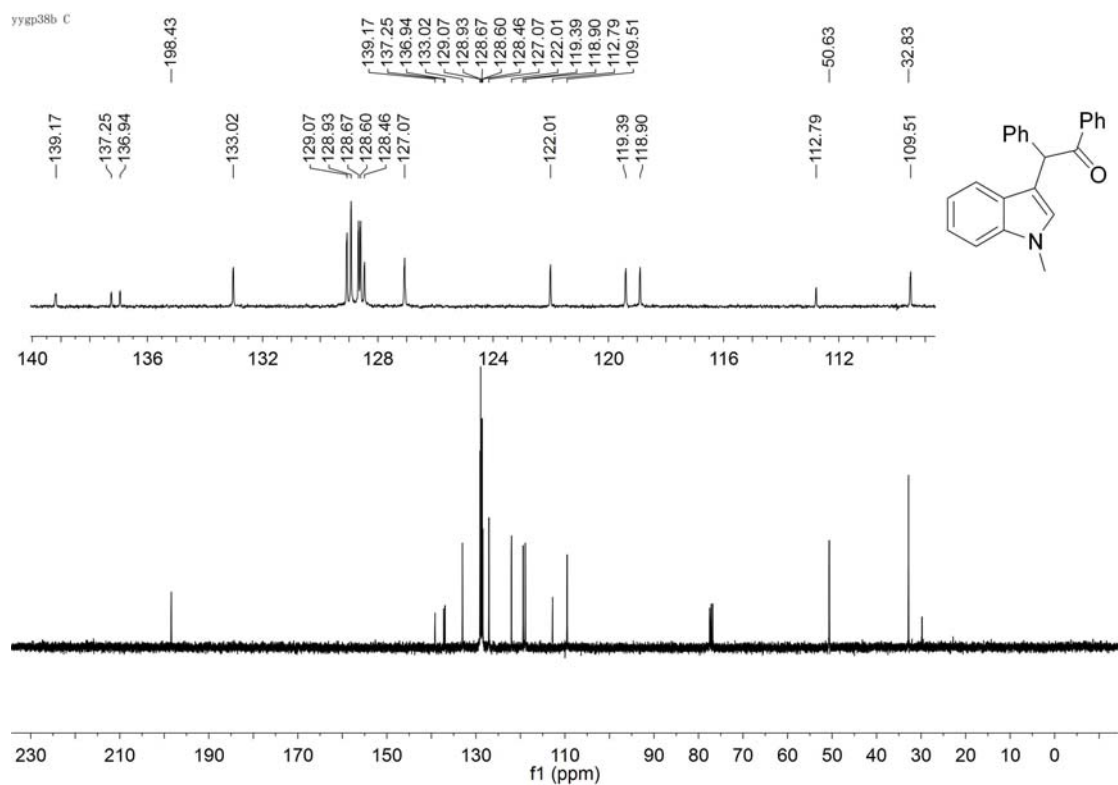



3a2

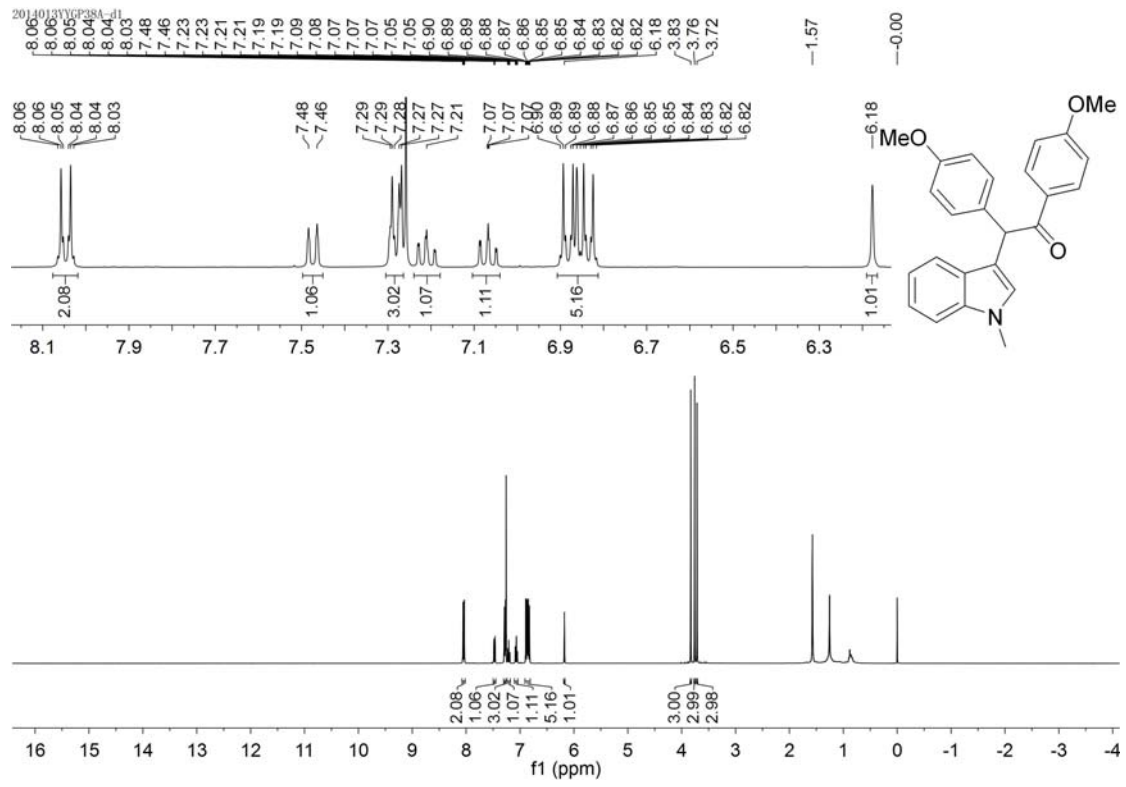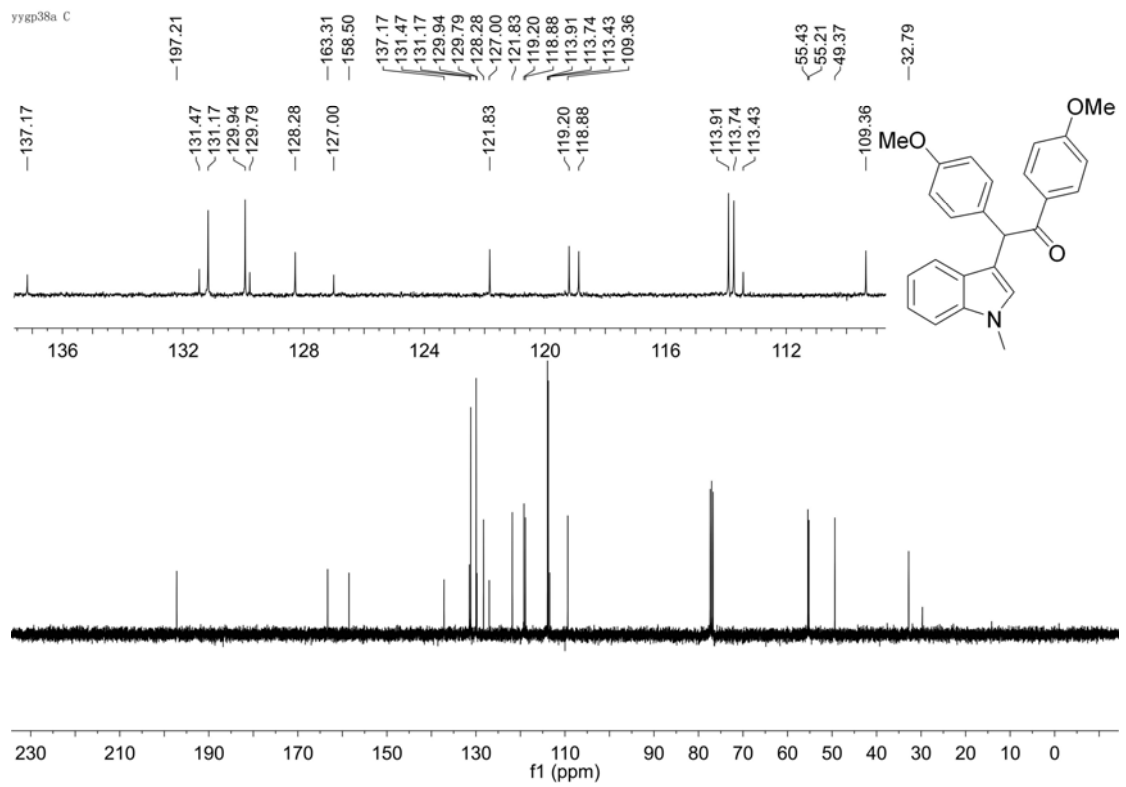

### 3a3

20140131YYGF39-d1

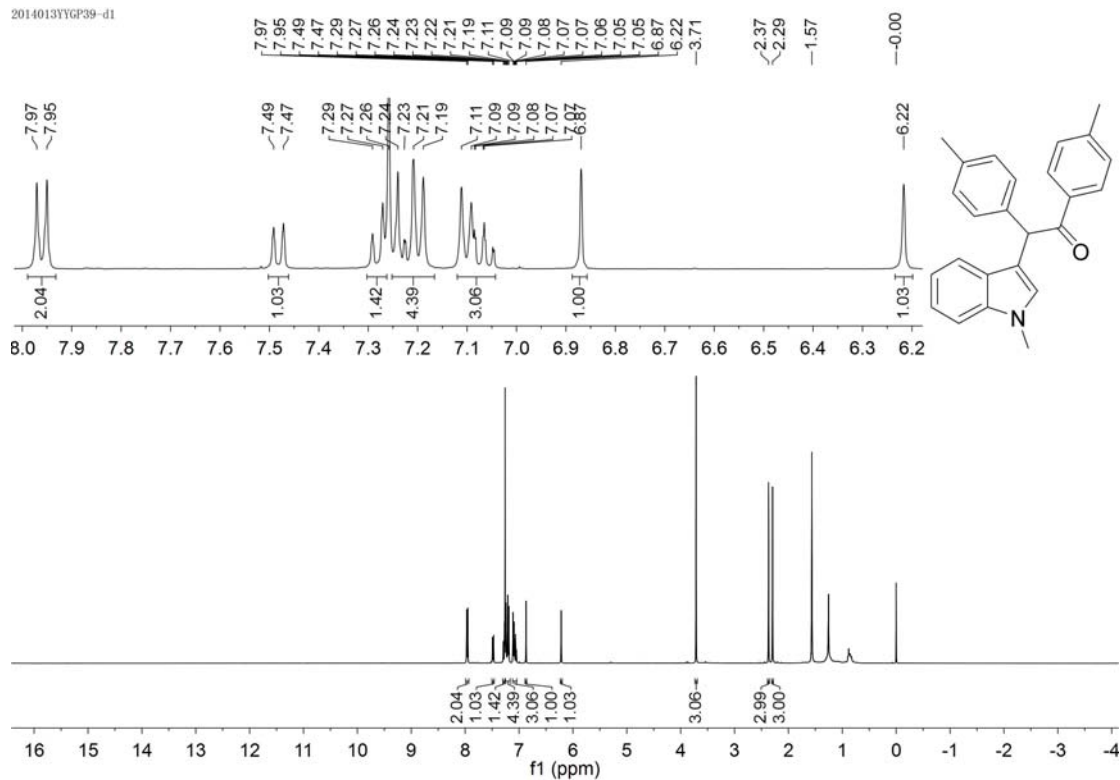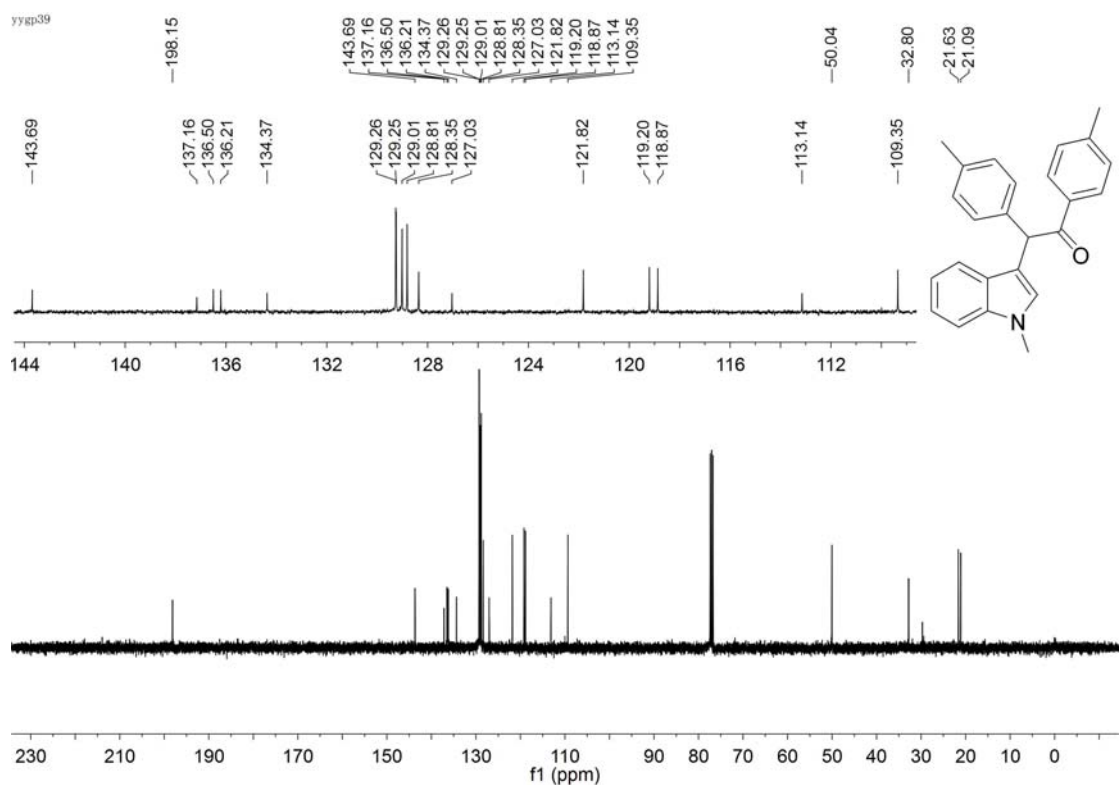

### 3a4

2014013YYGP24-d6

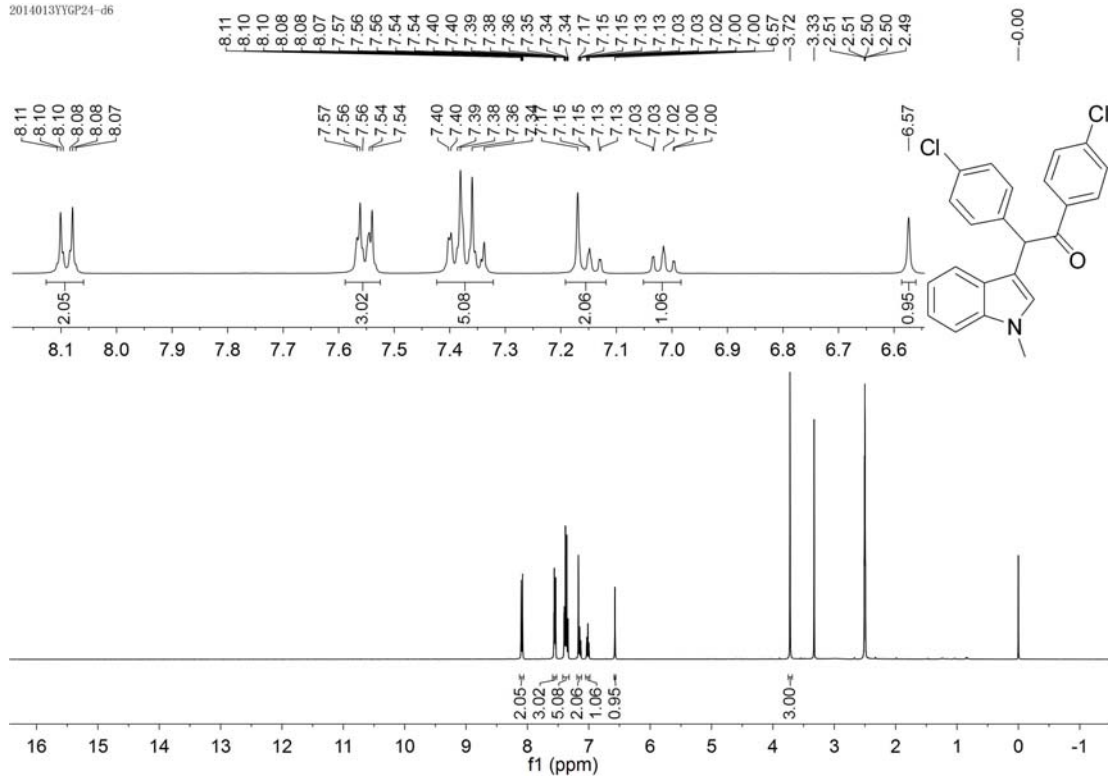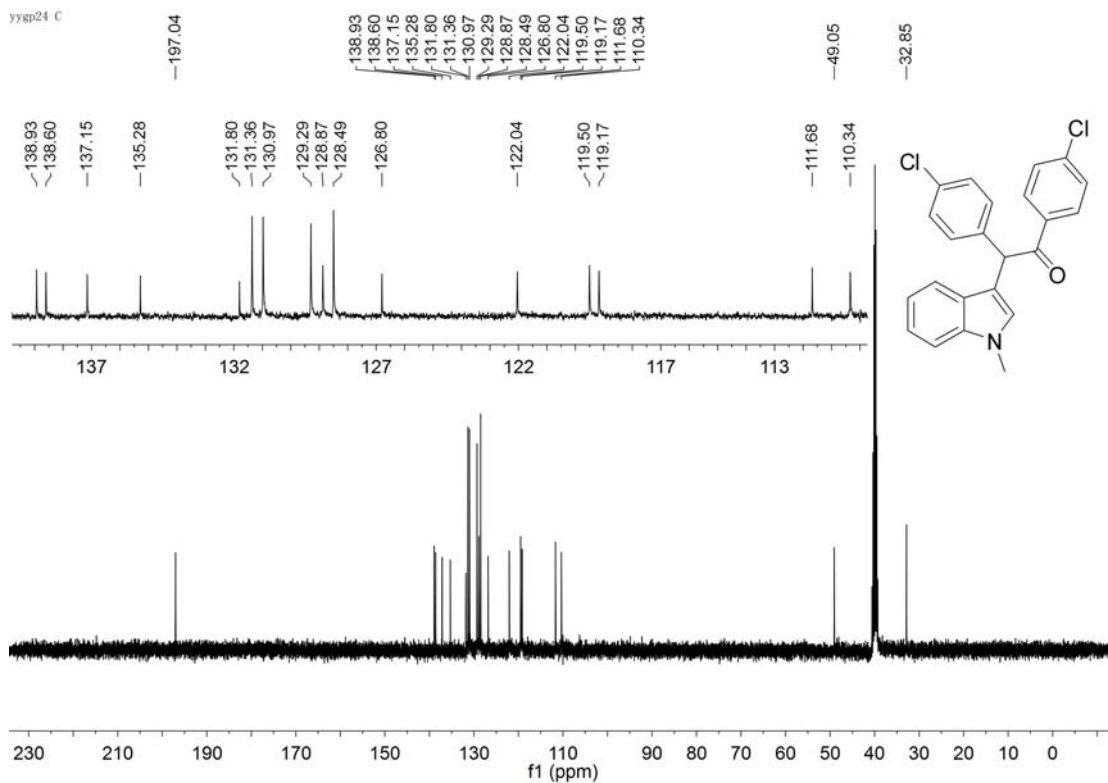

### 3a5

20140131YGP26-d6

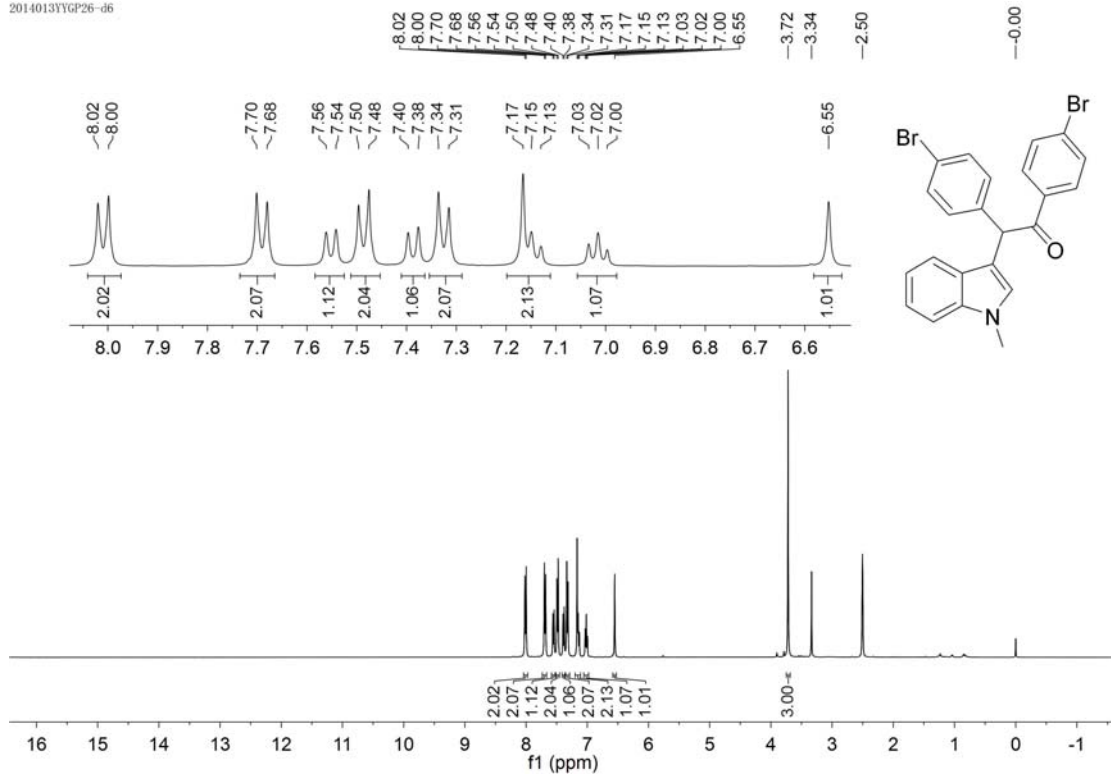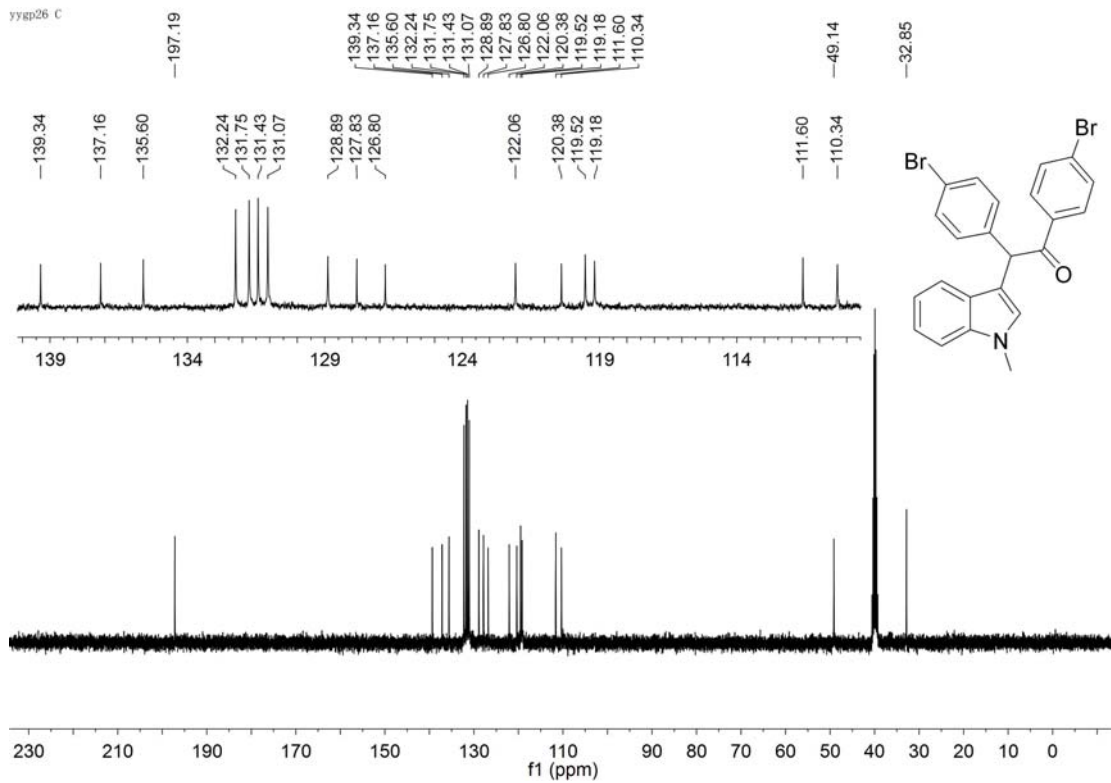

3a6

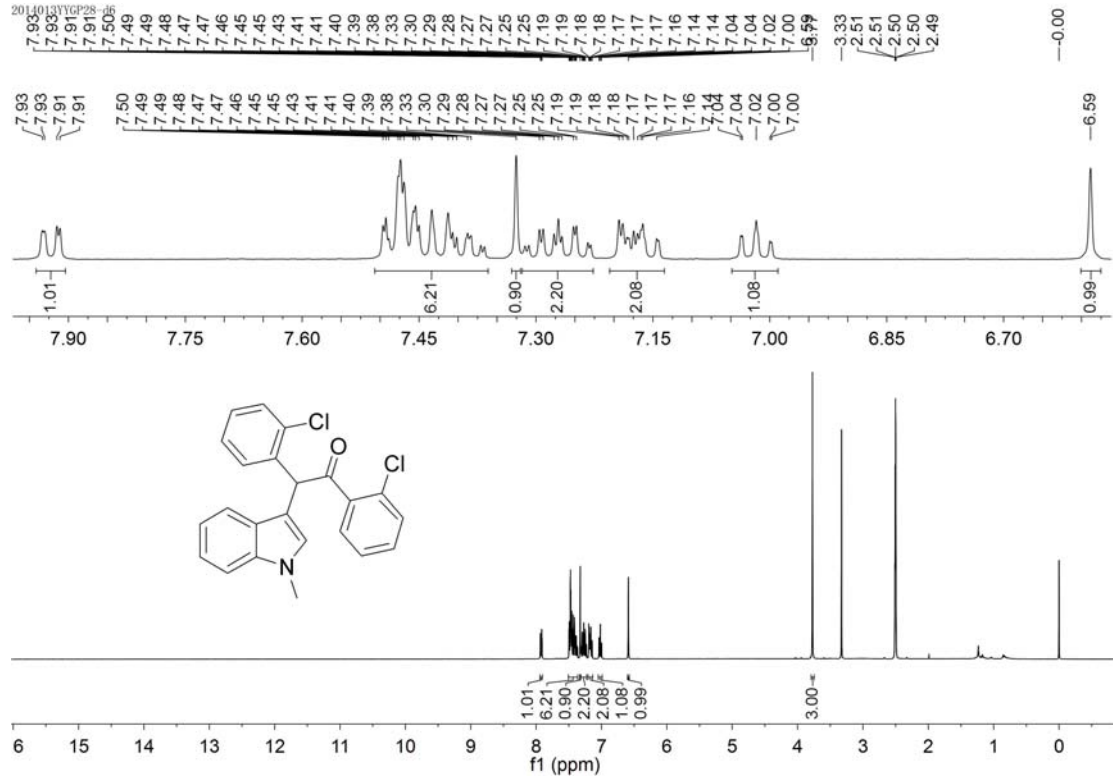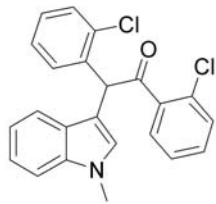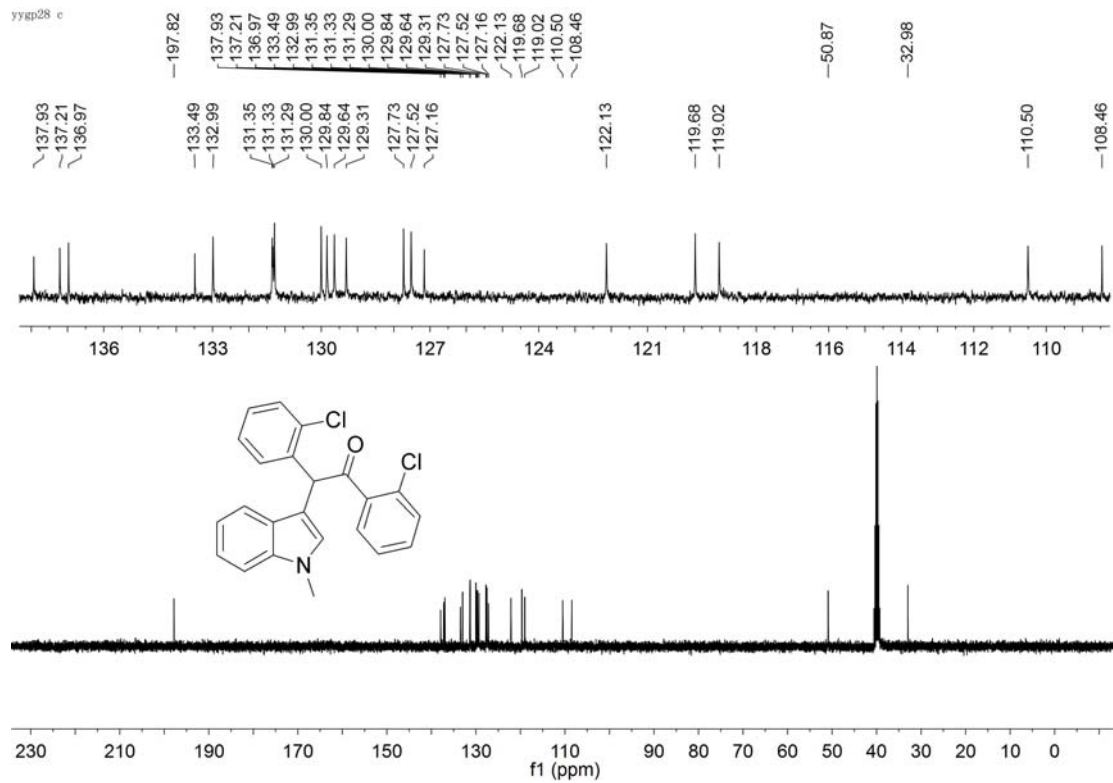

3a7

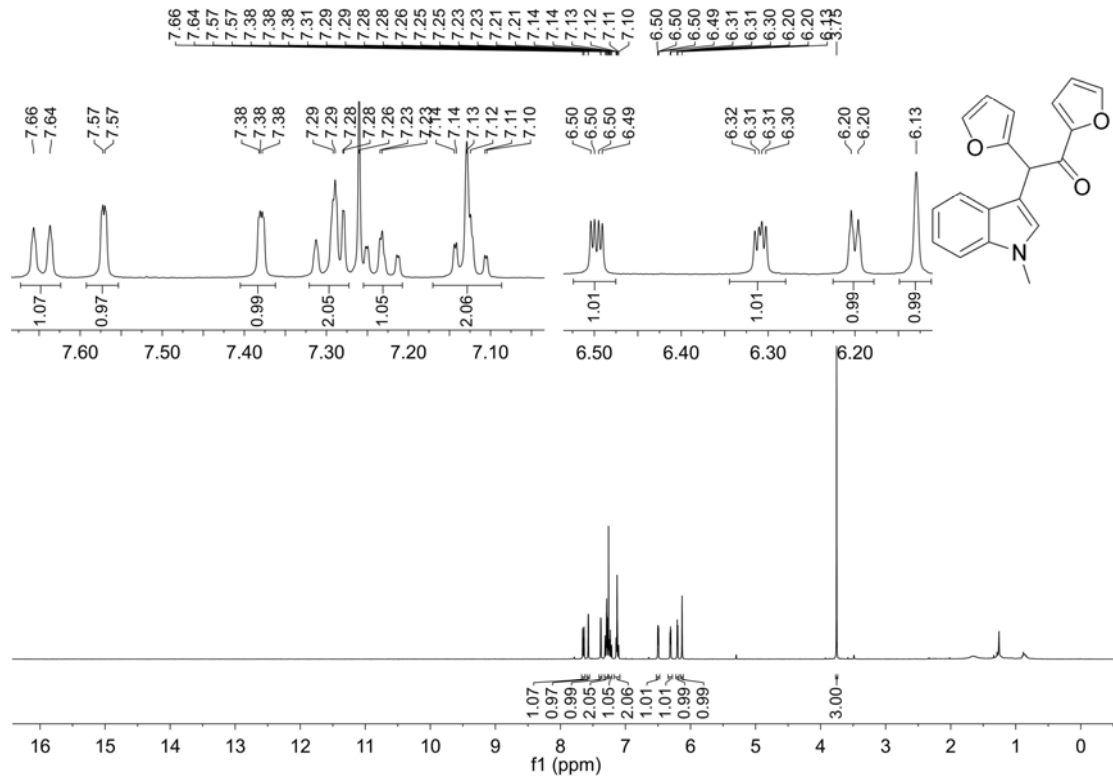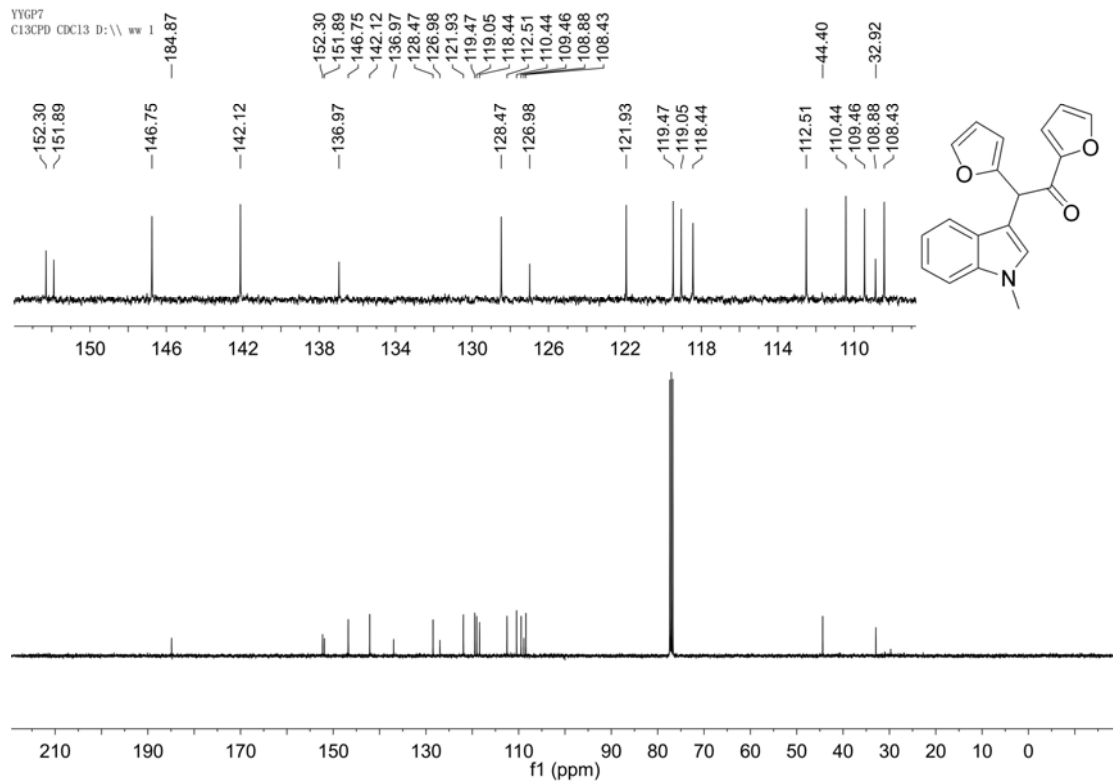

### 3a8

FW-H  
YYGP12

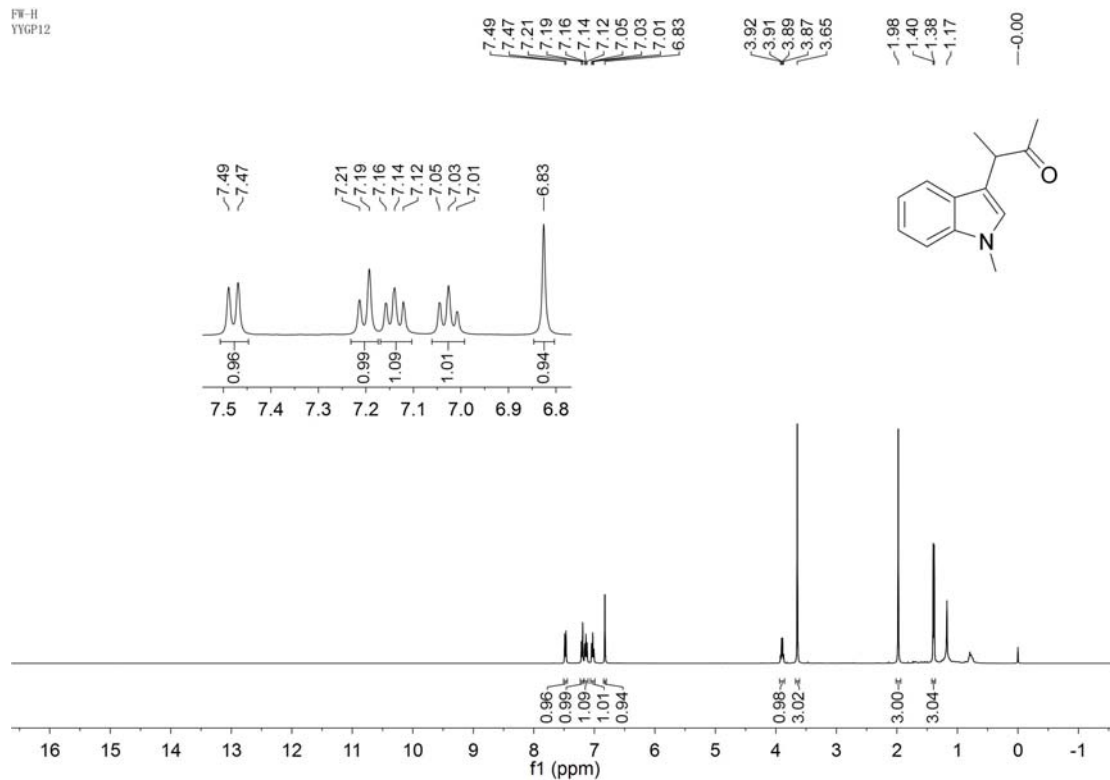

FW-C  
YYGP12

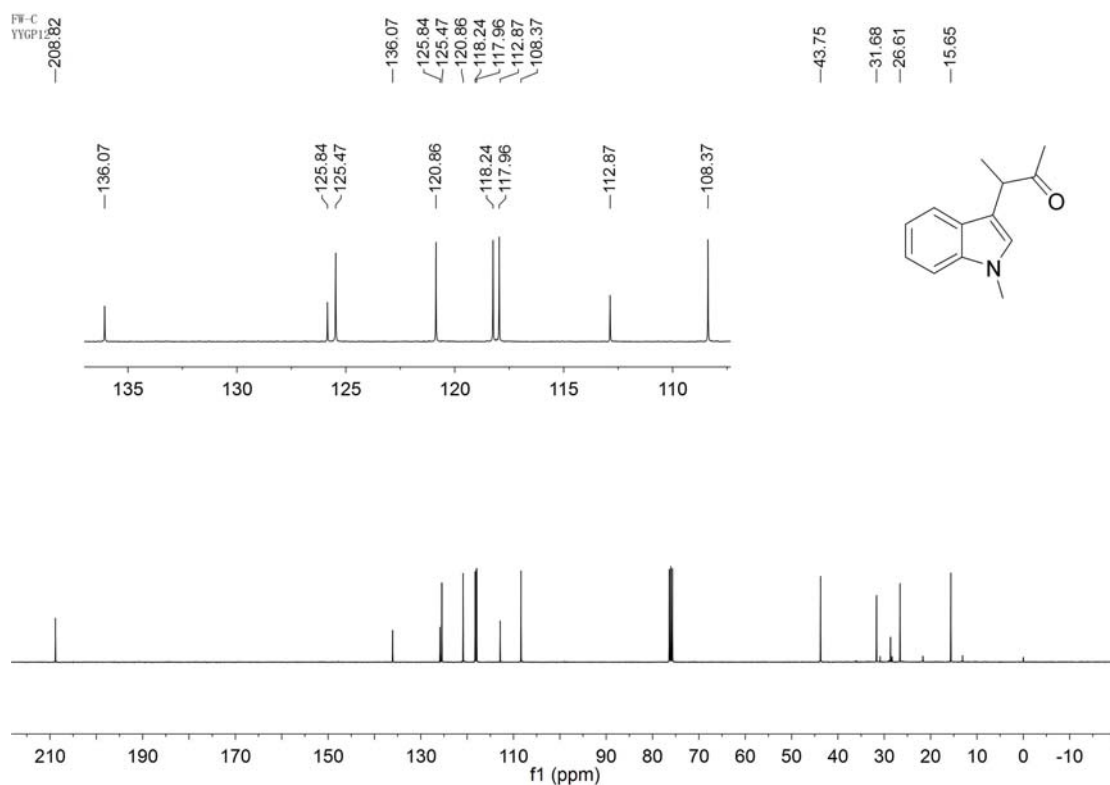

### 3b1

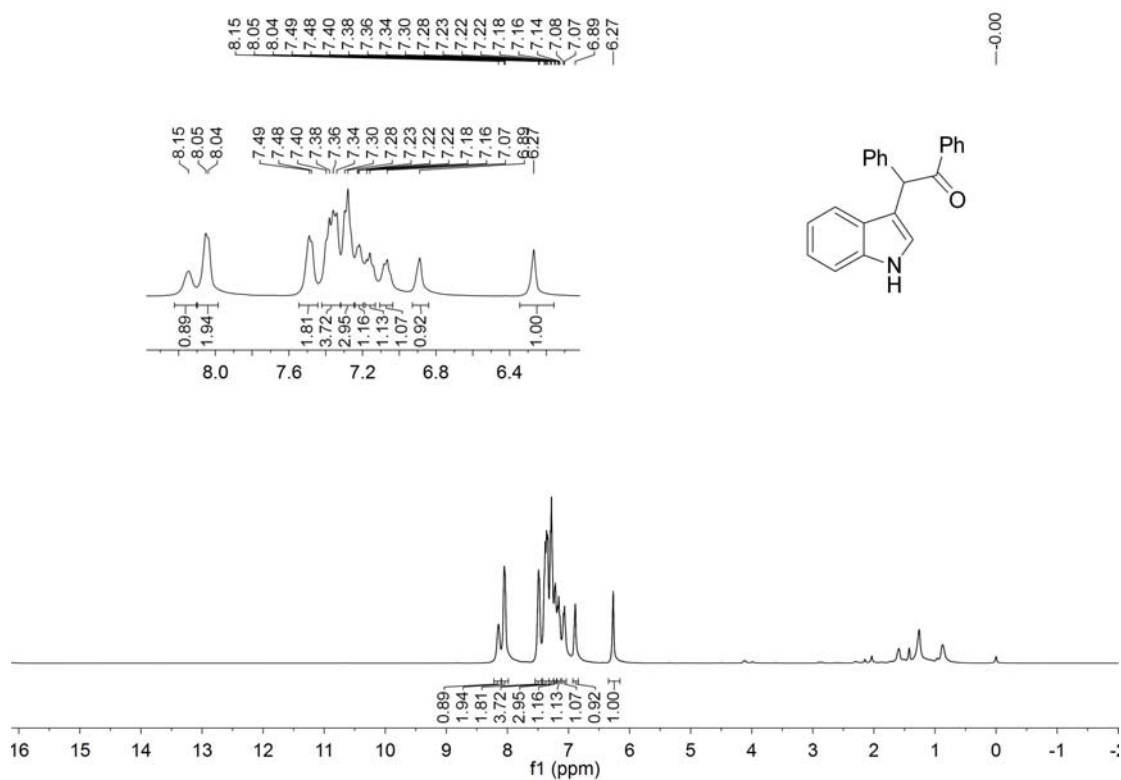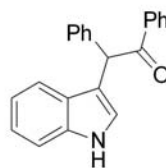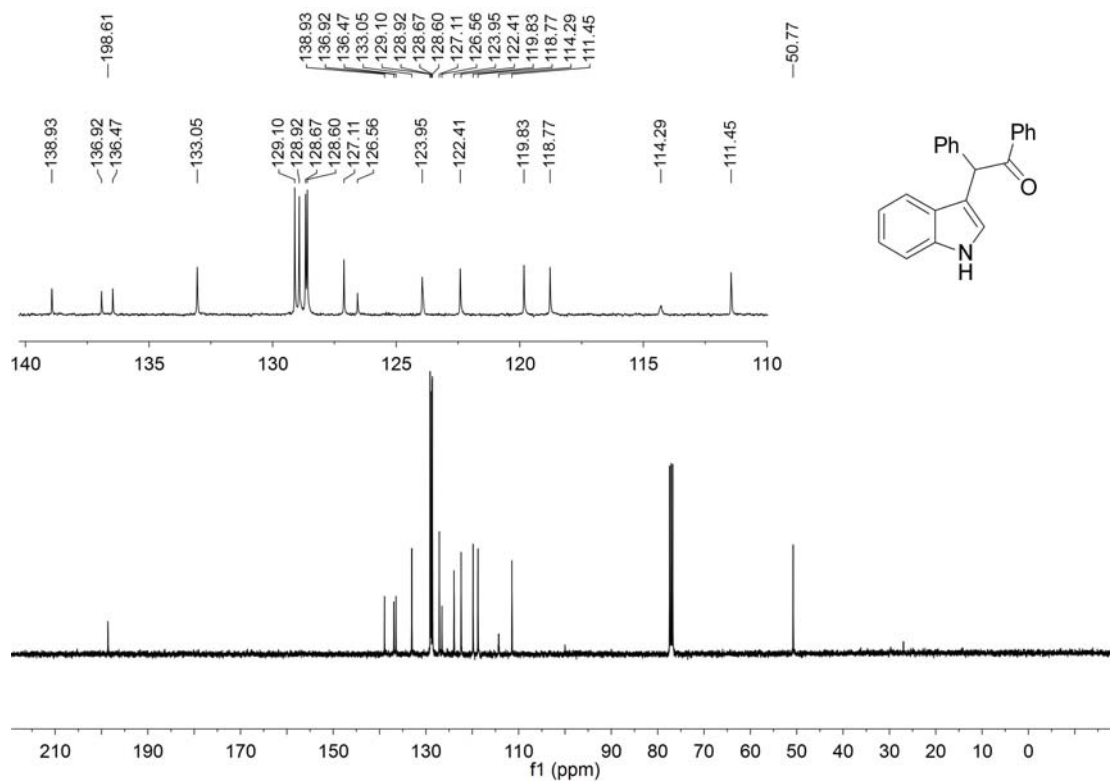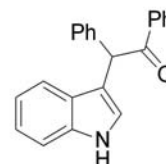



### 3b2

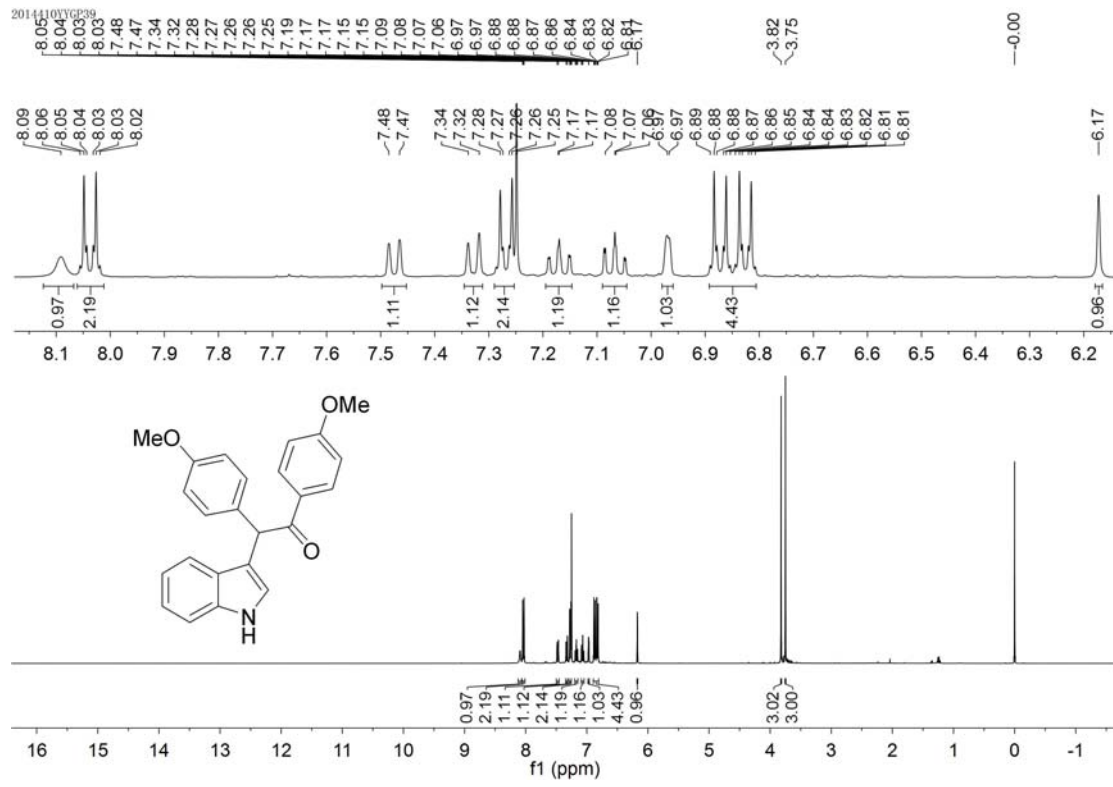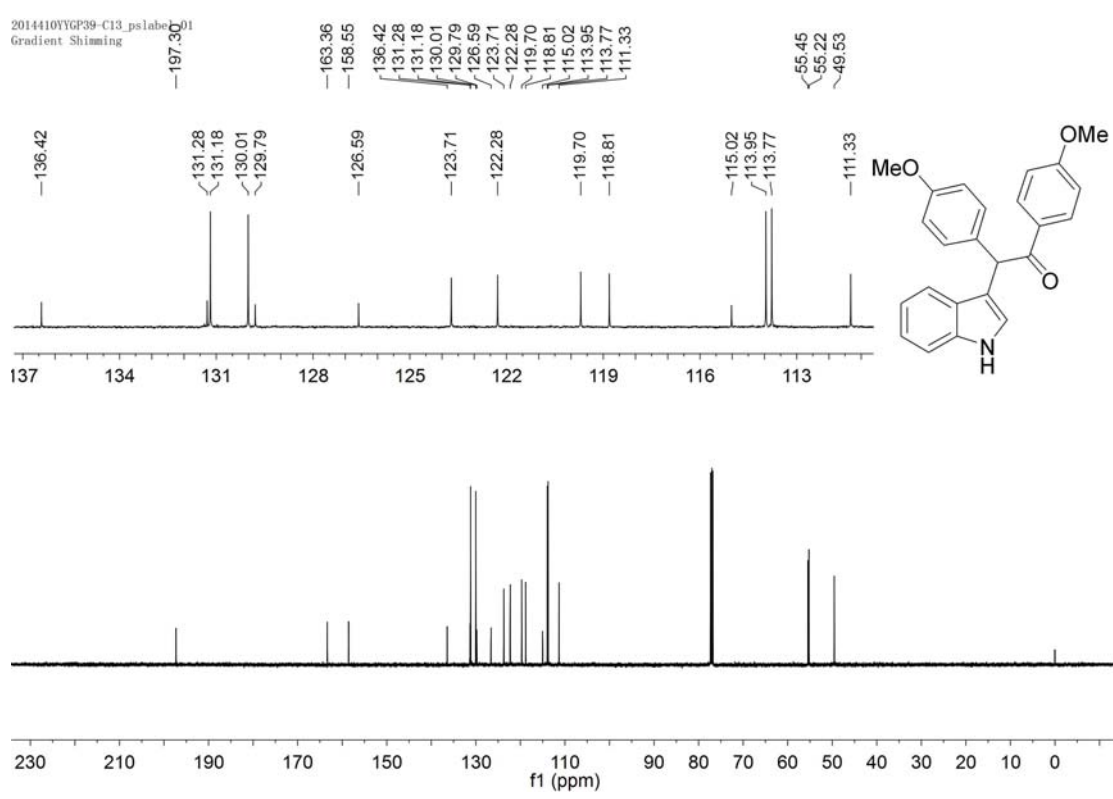

### 3b3

FW-H  
FLP55B

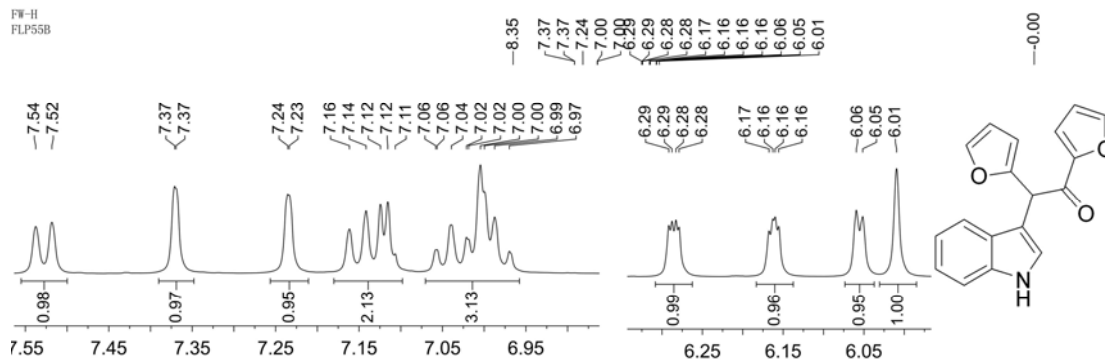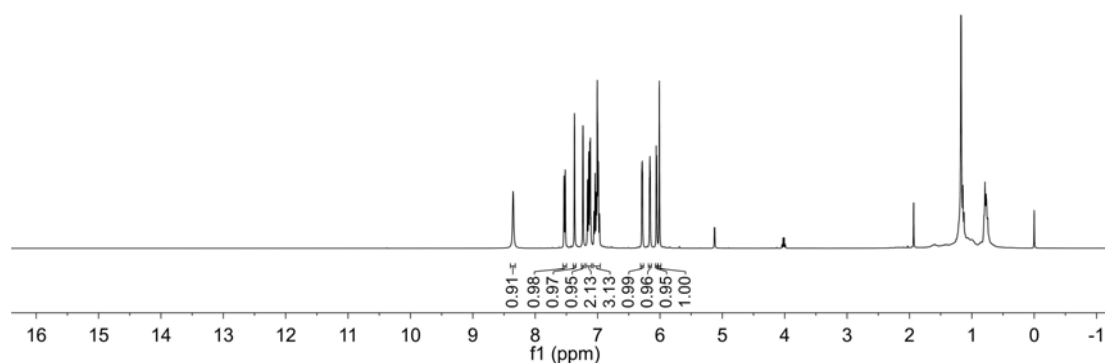

FW-C  
FLP55B

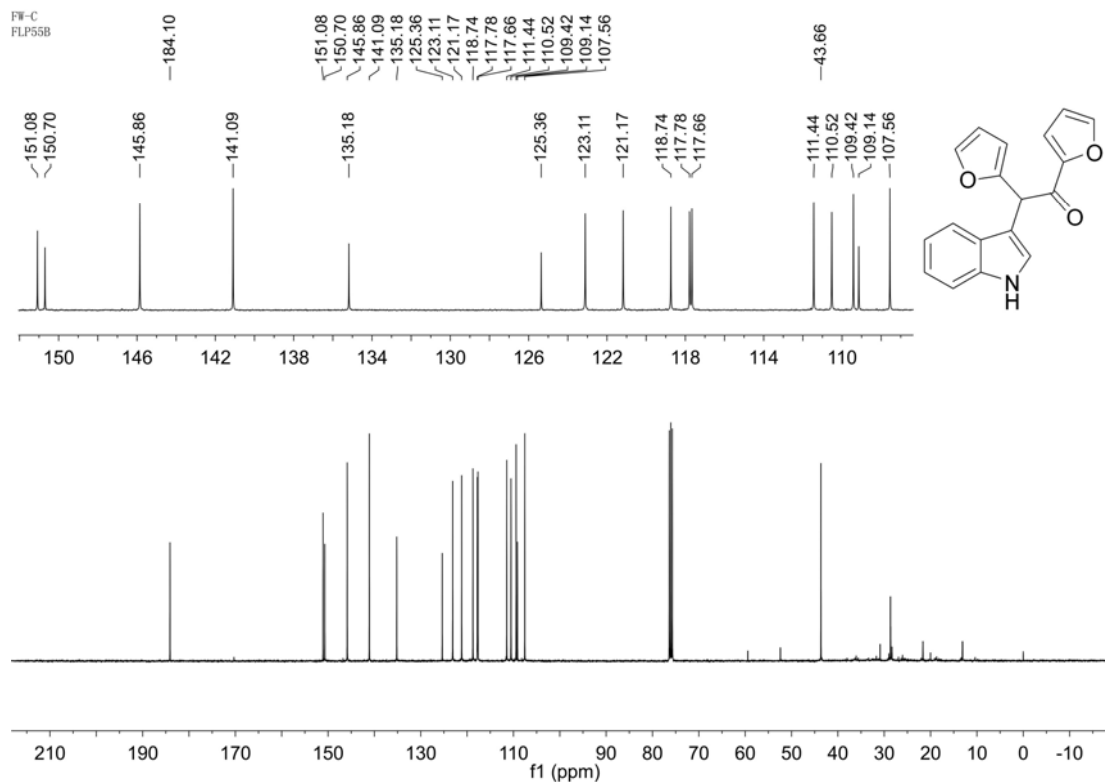

3c

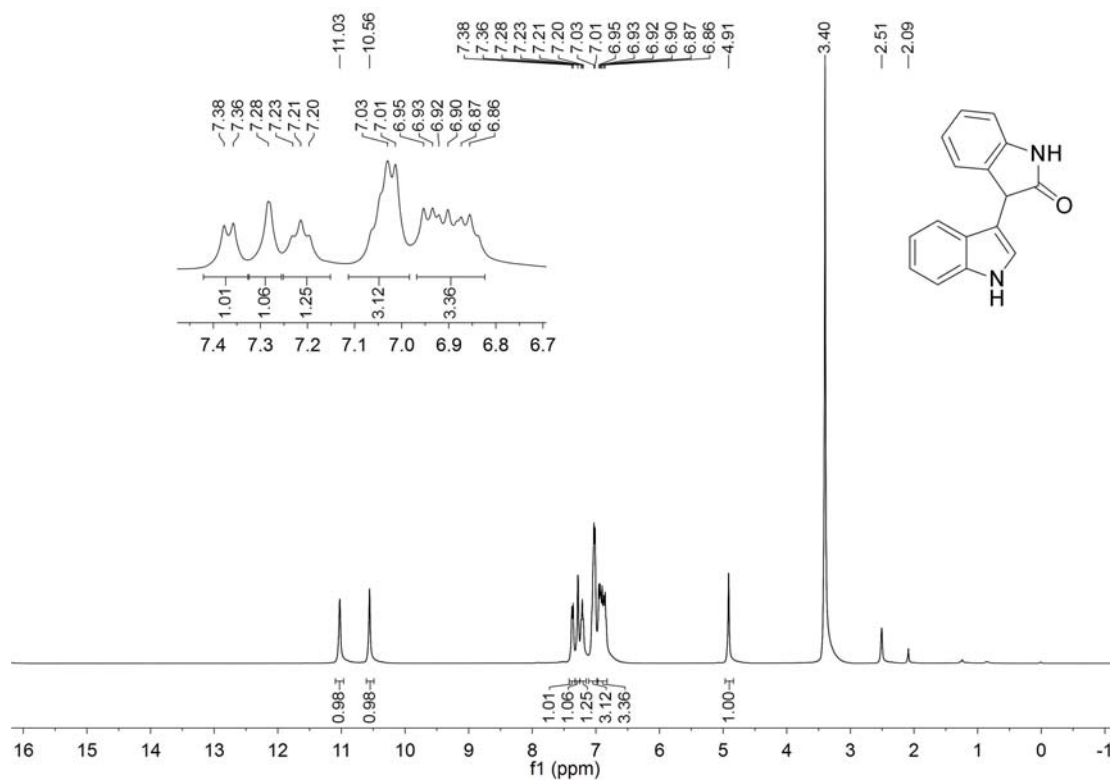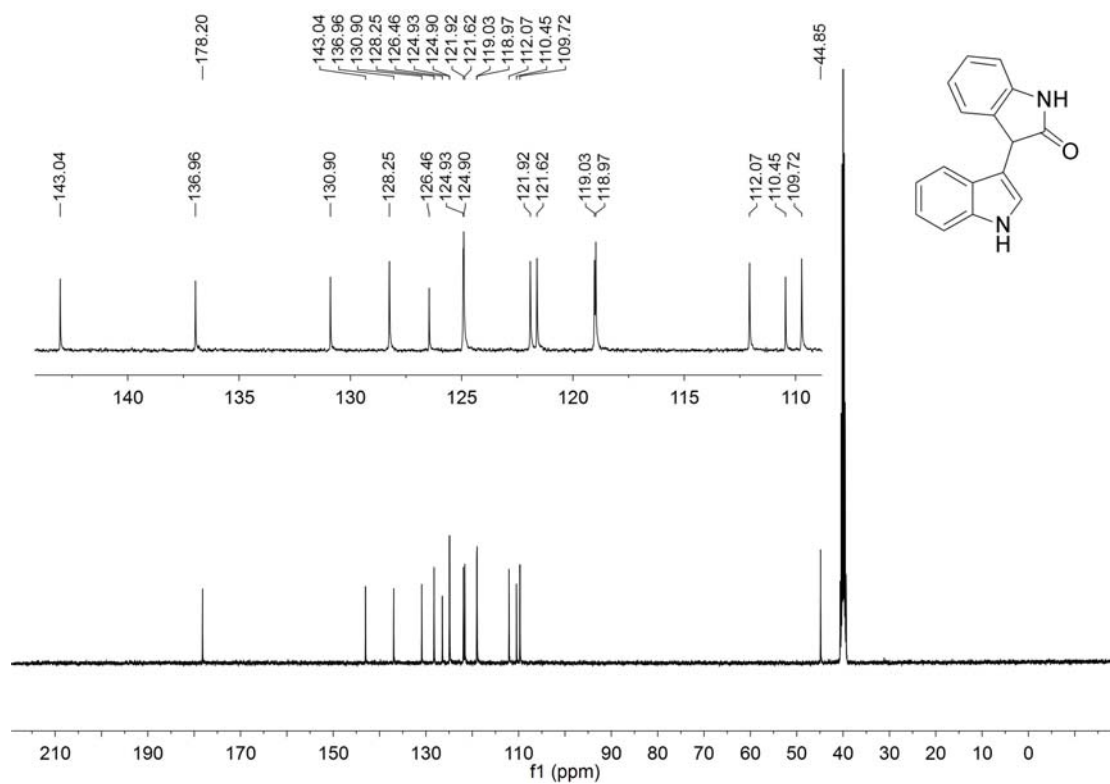

### 3d1

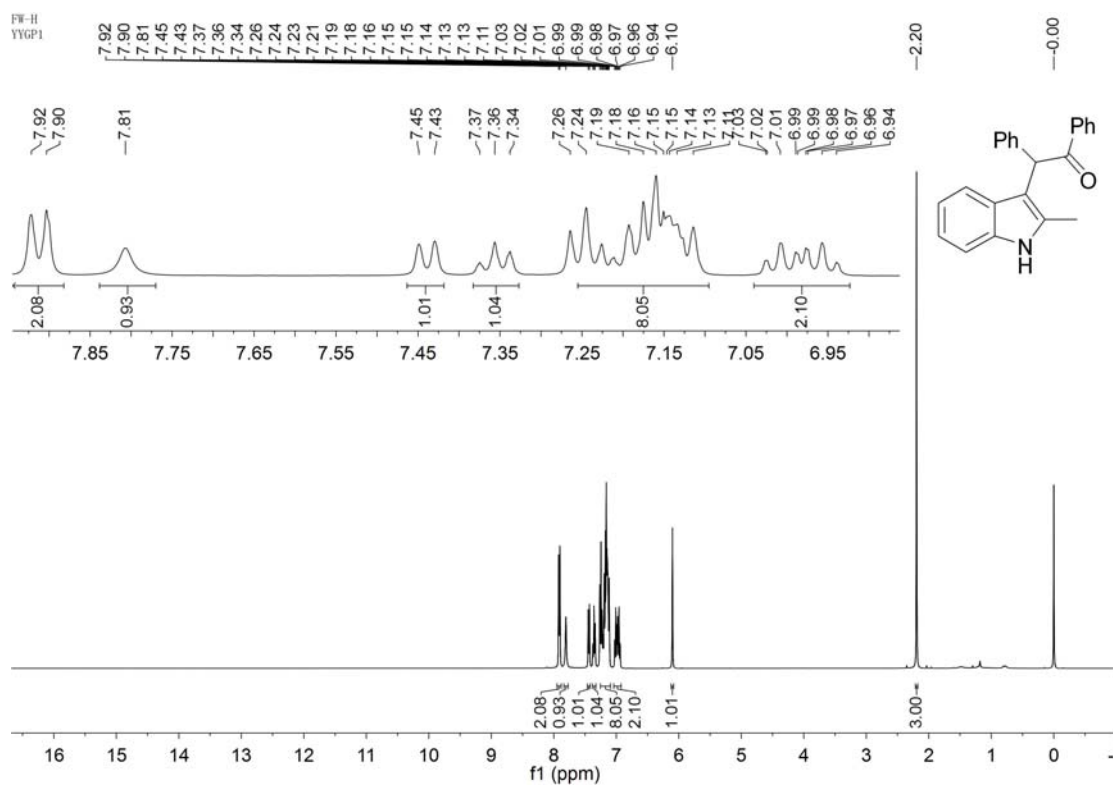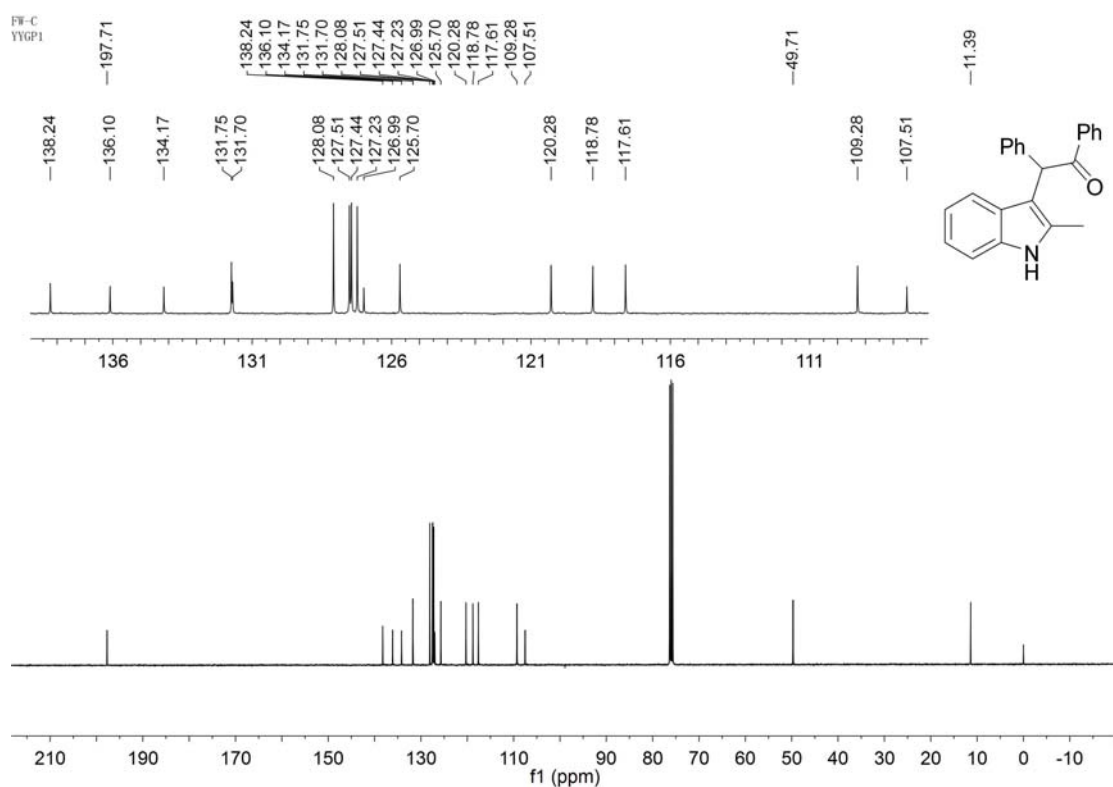

### 3d2

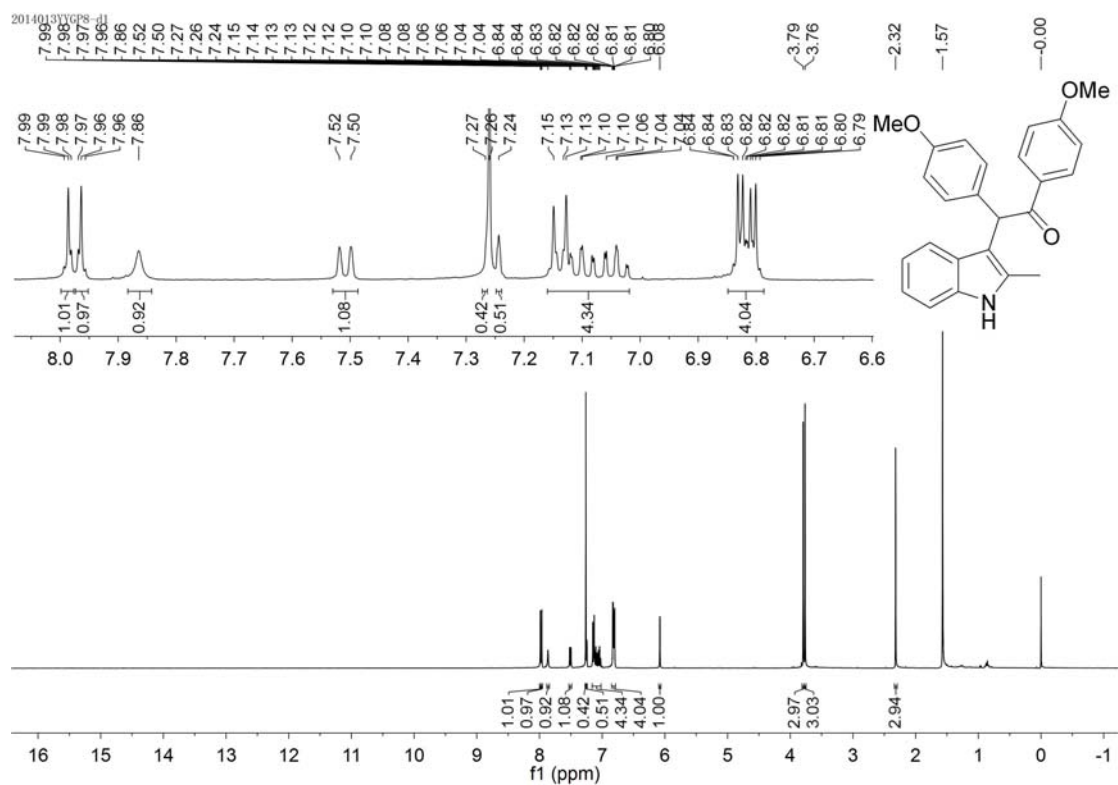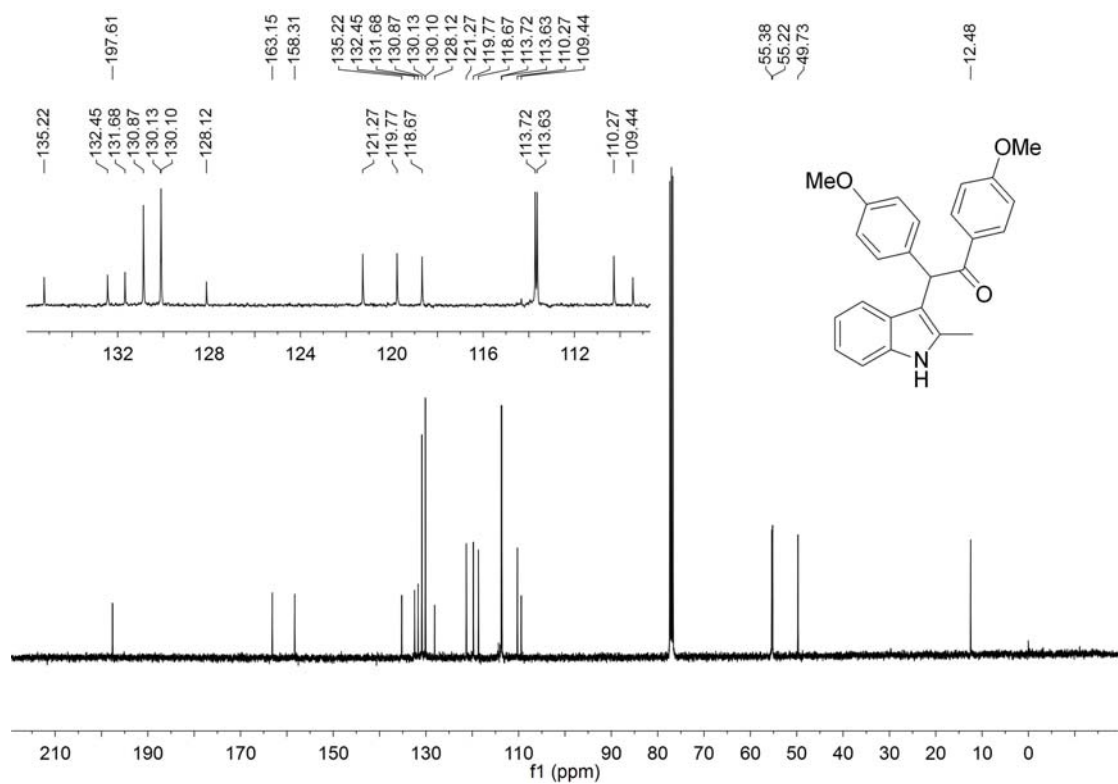

3d3

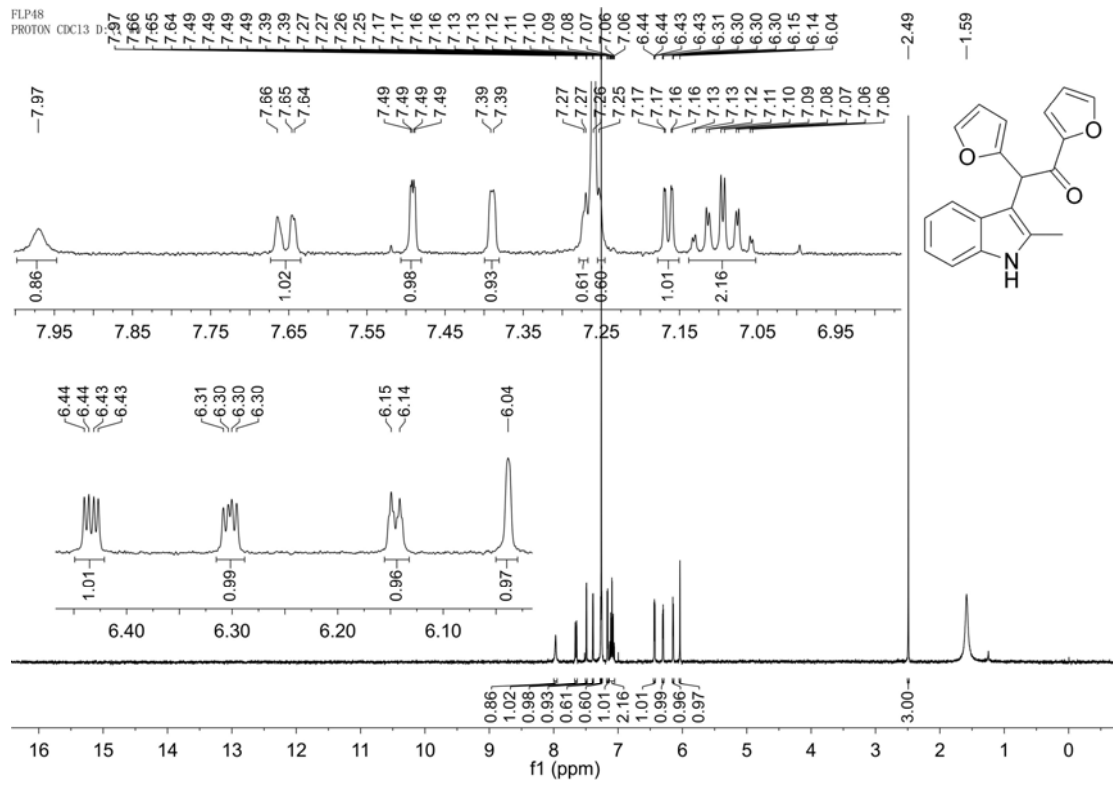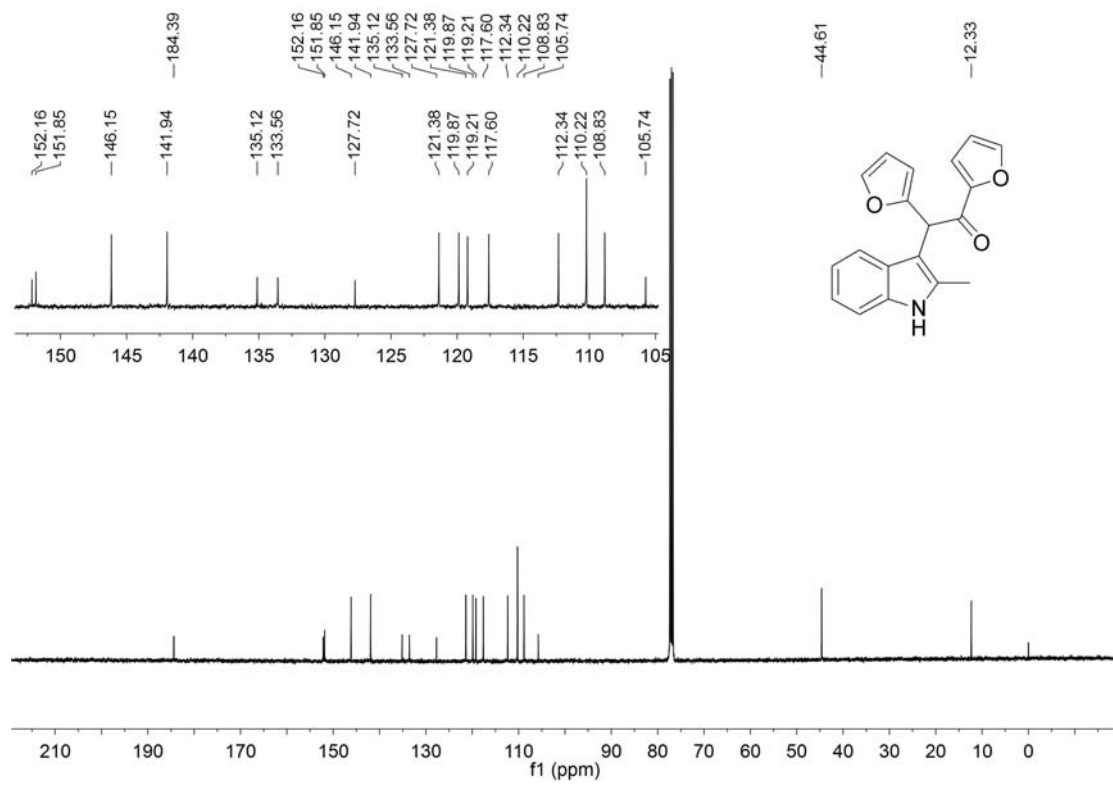

3e

2014013YYGP16-d6

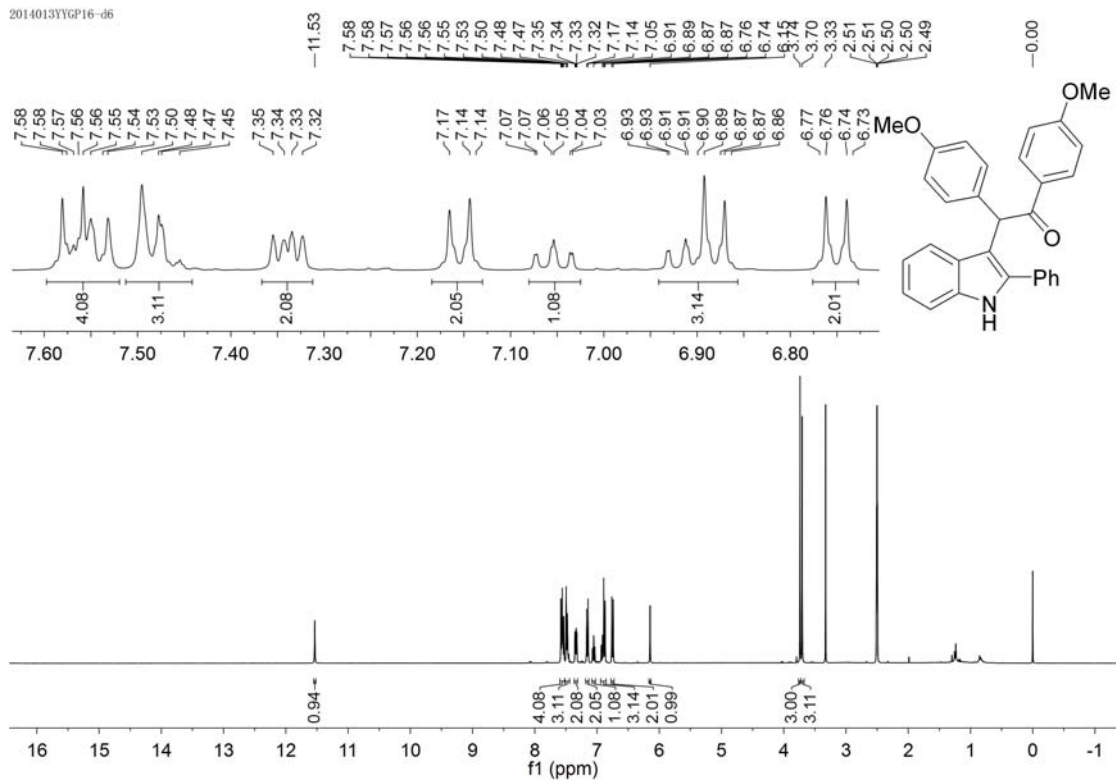

yygp16 C

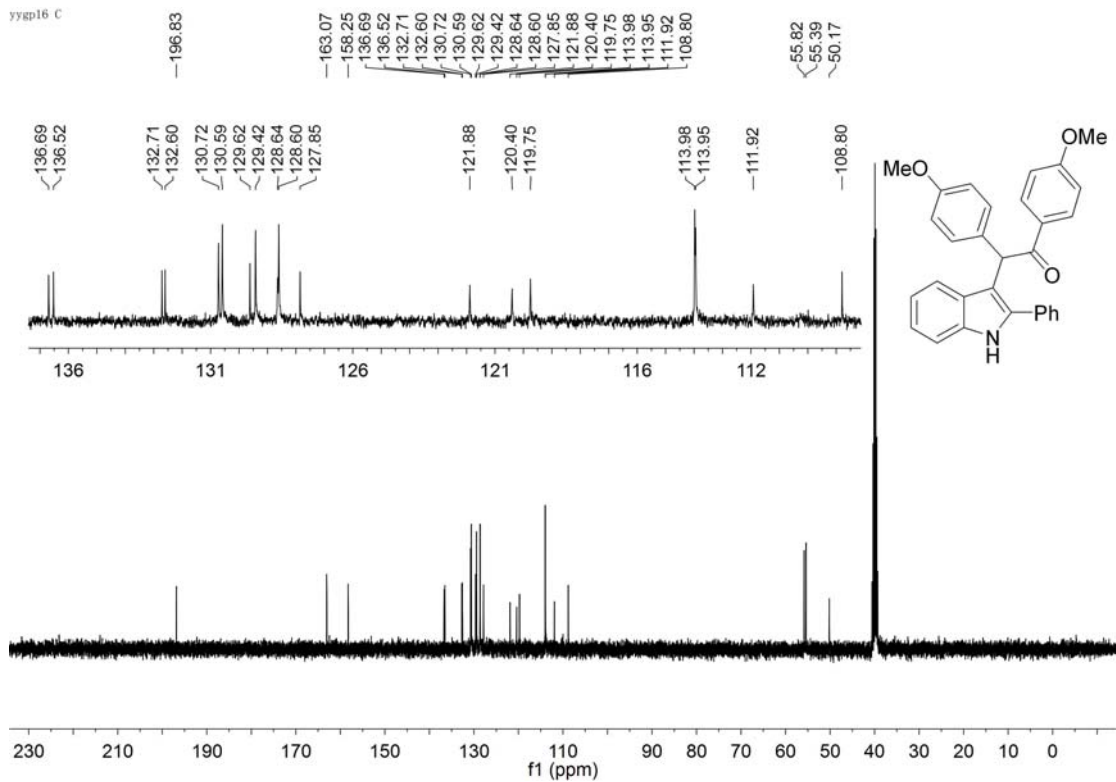

**3f**

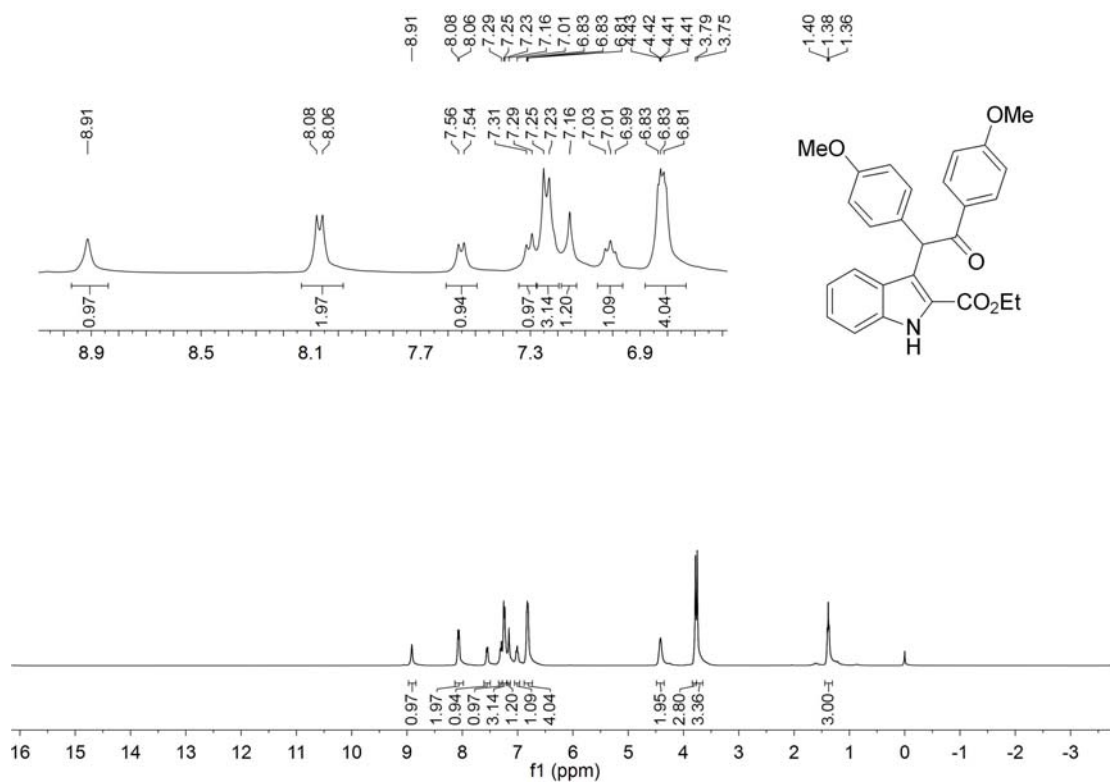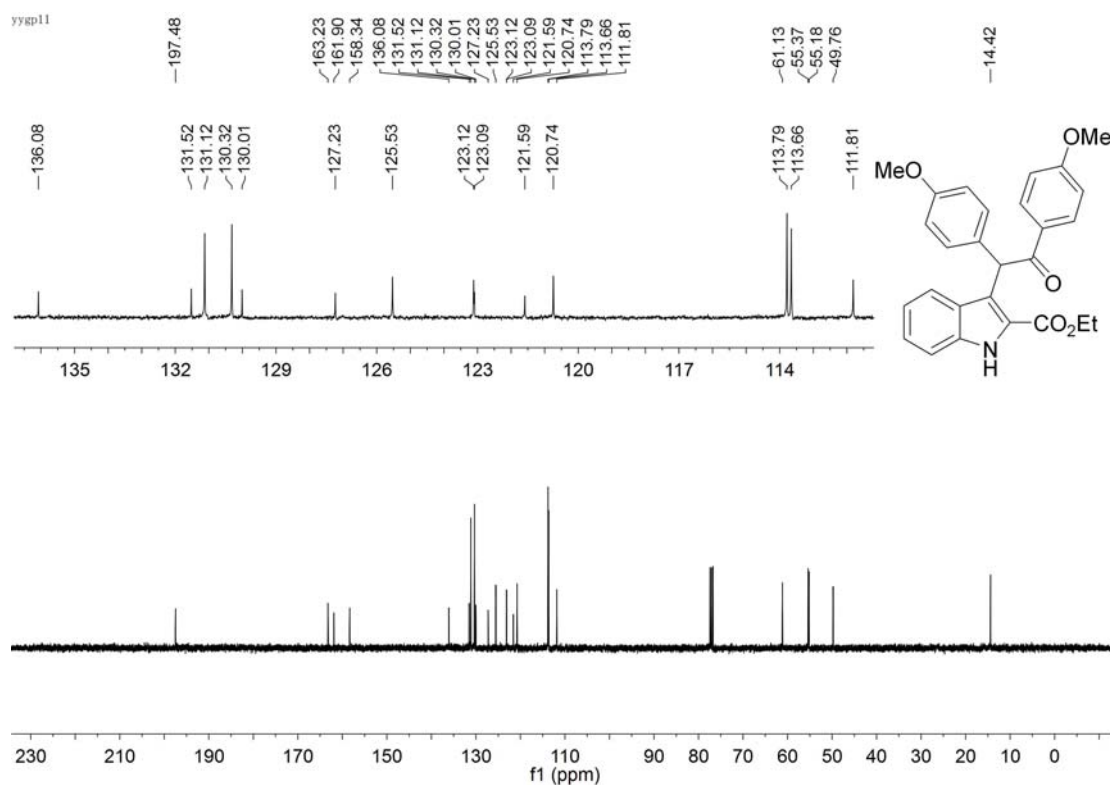



### 3g1

2014013FLP34-d6

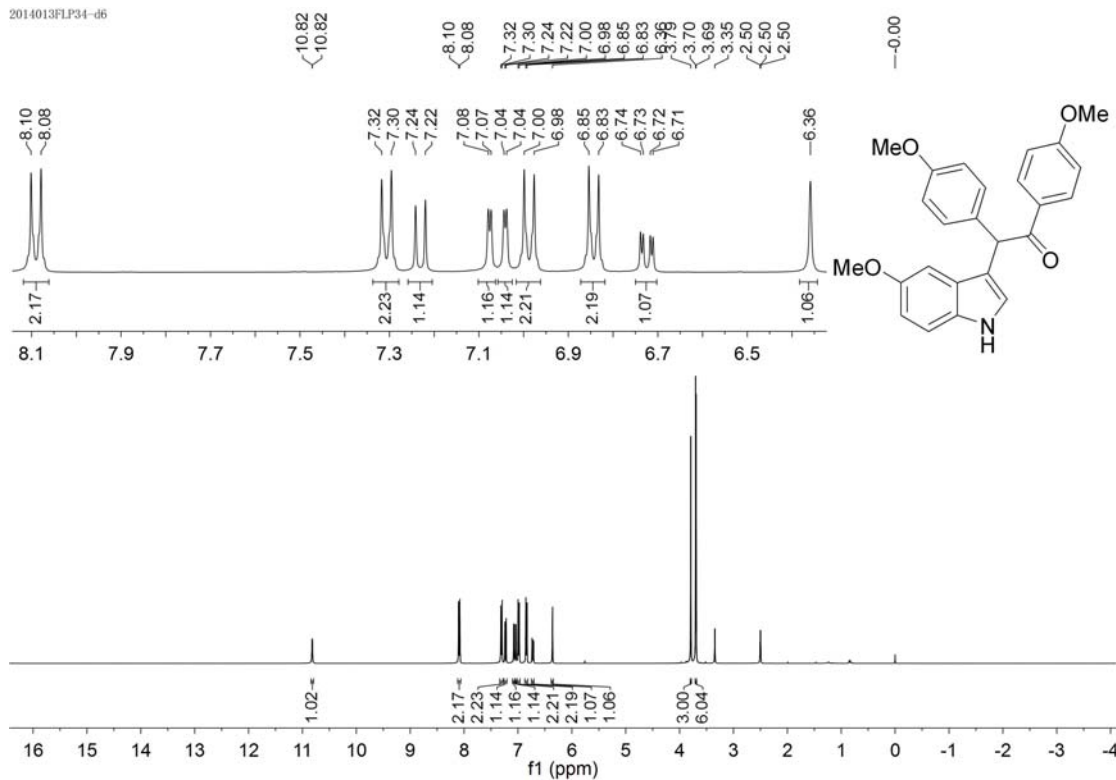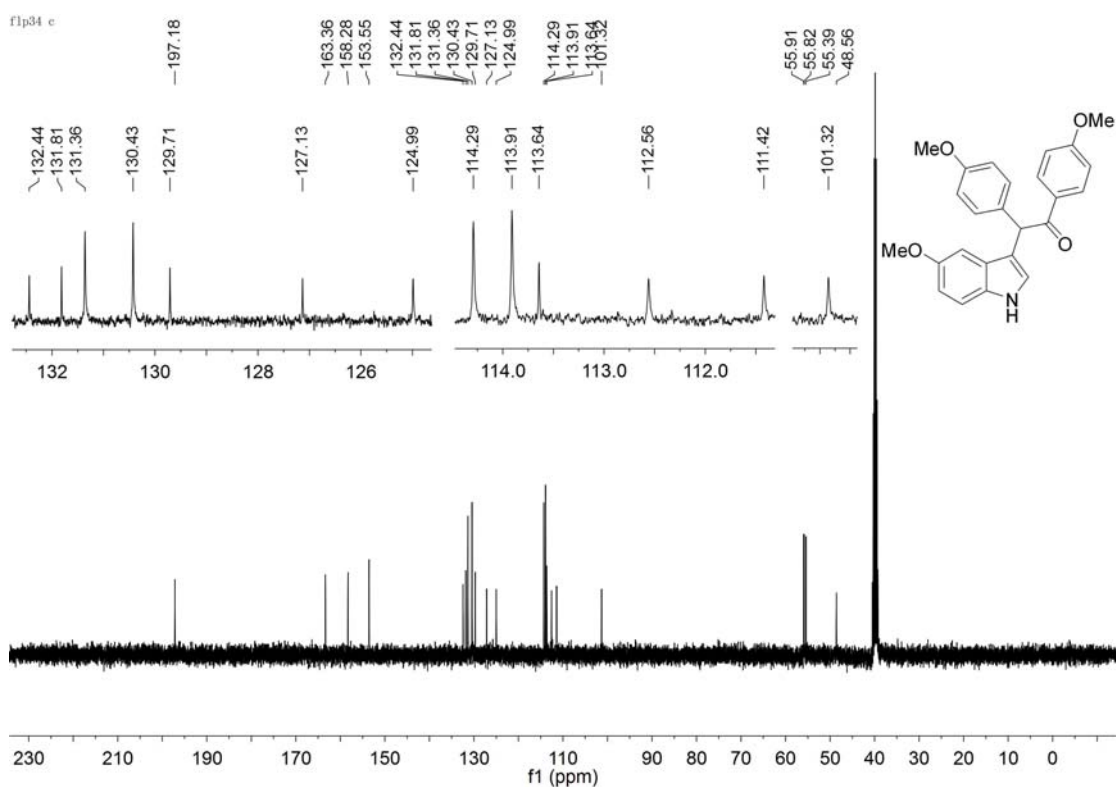

### 3g2

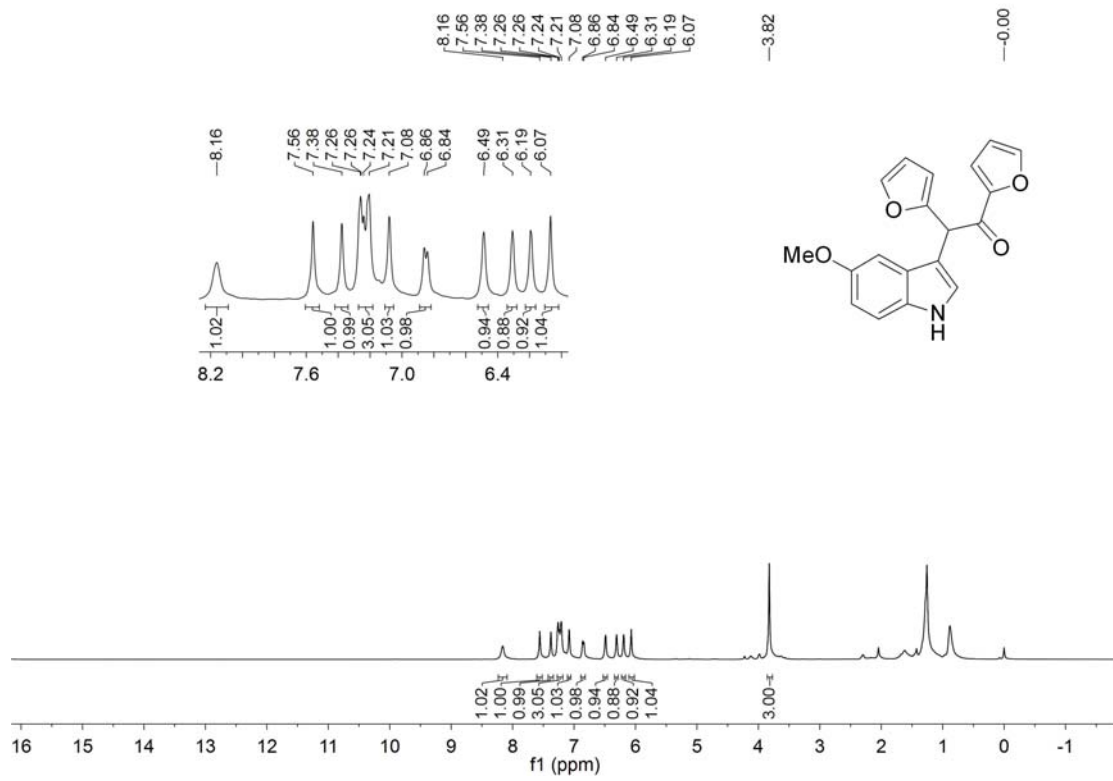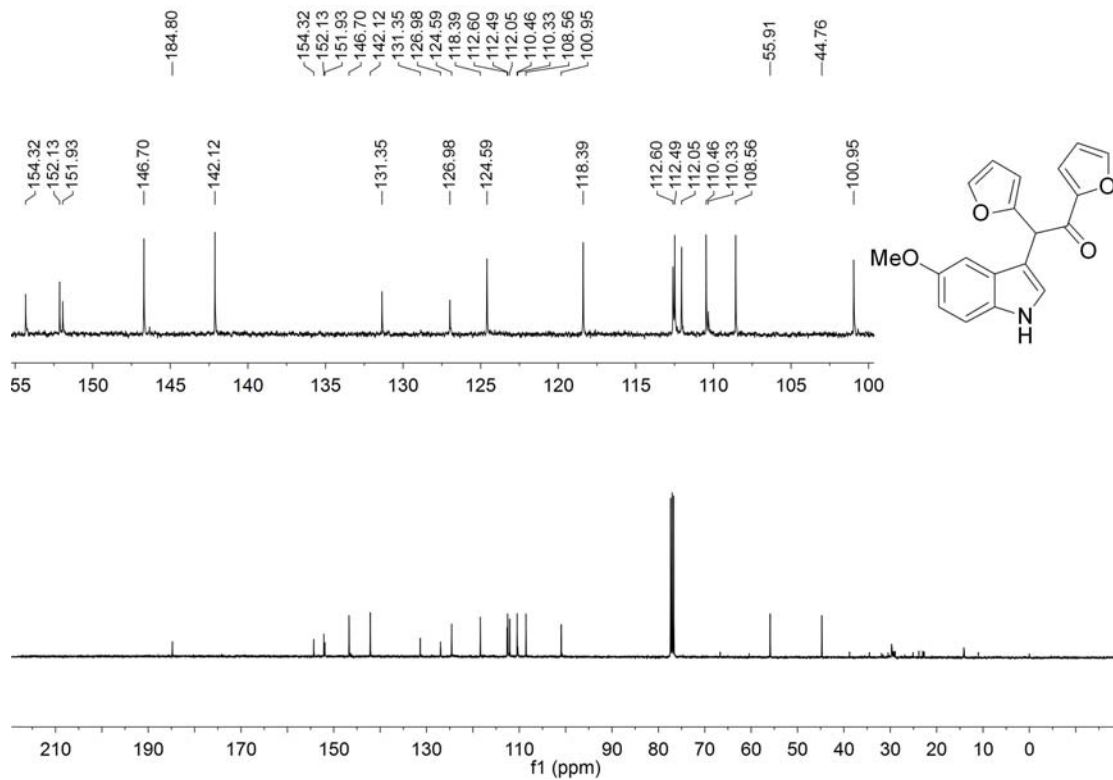

### 3h1

2014013YYGP42C-d6

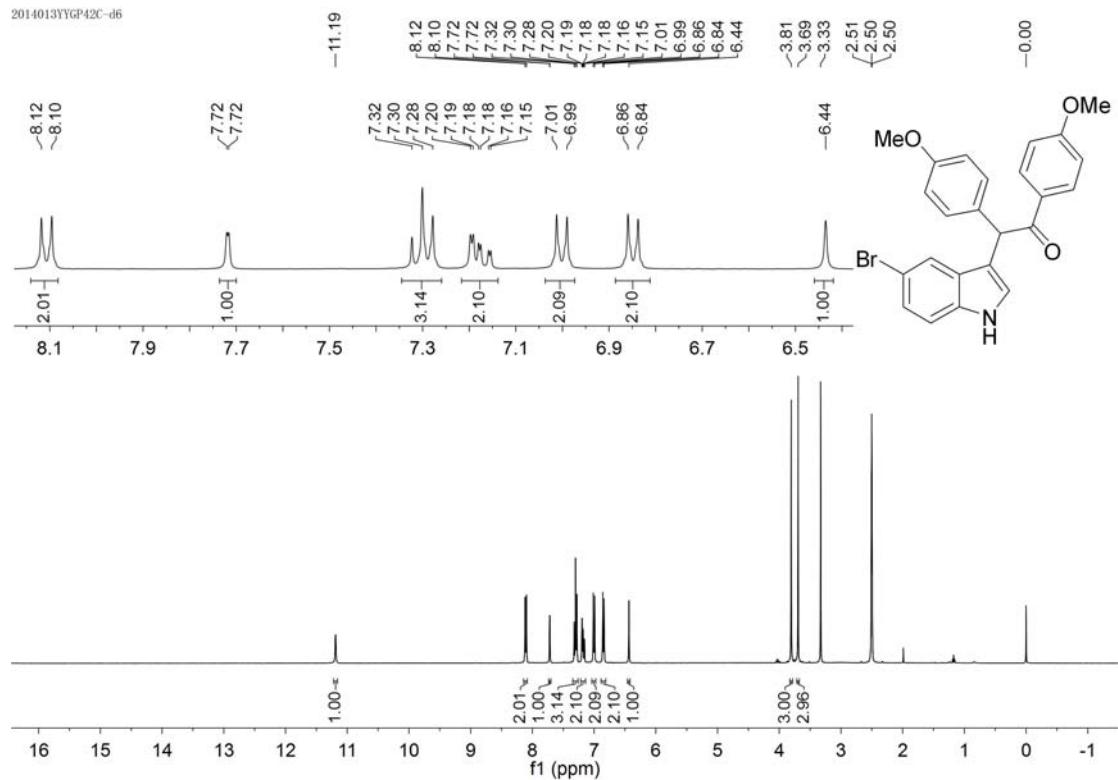

yygp42c c

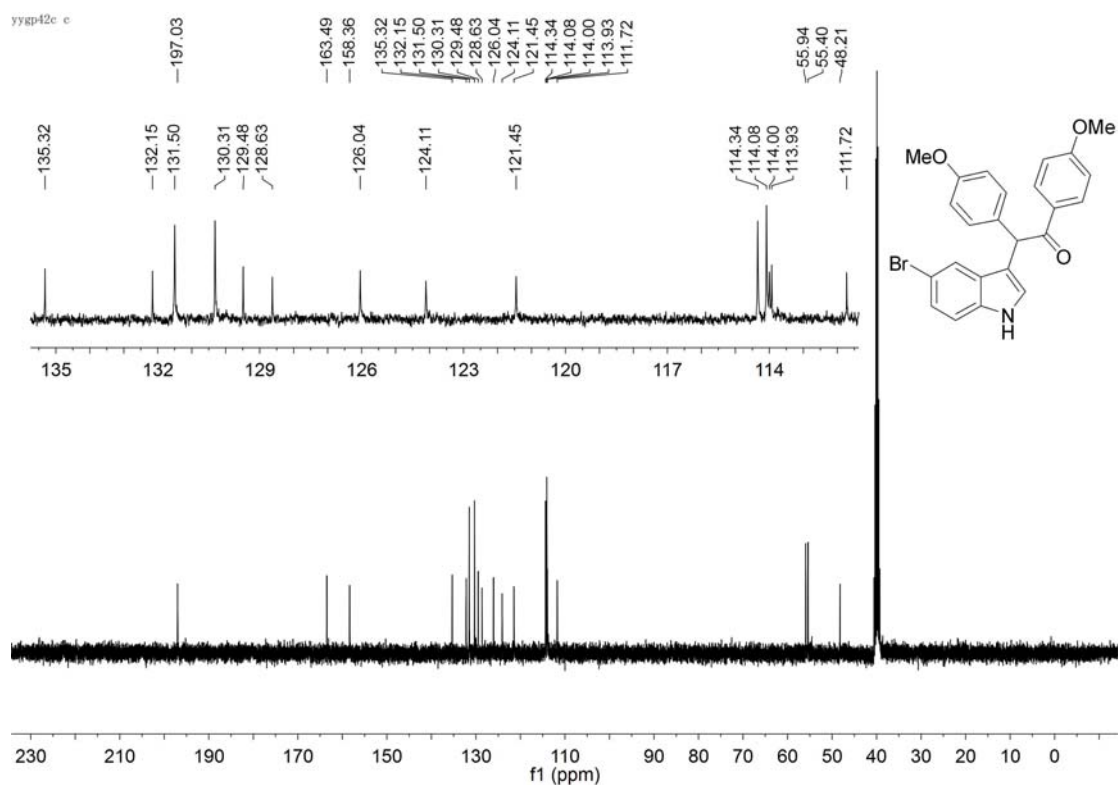

### 3h2

FW-H  
FLP54

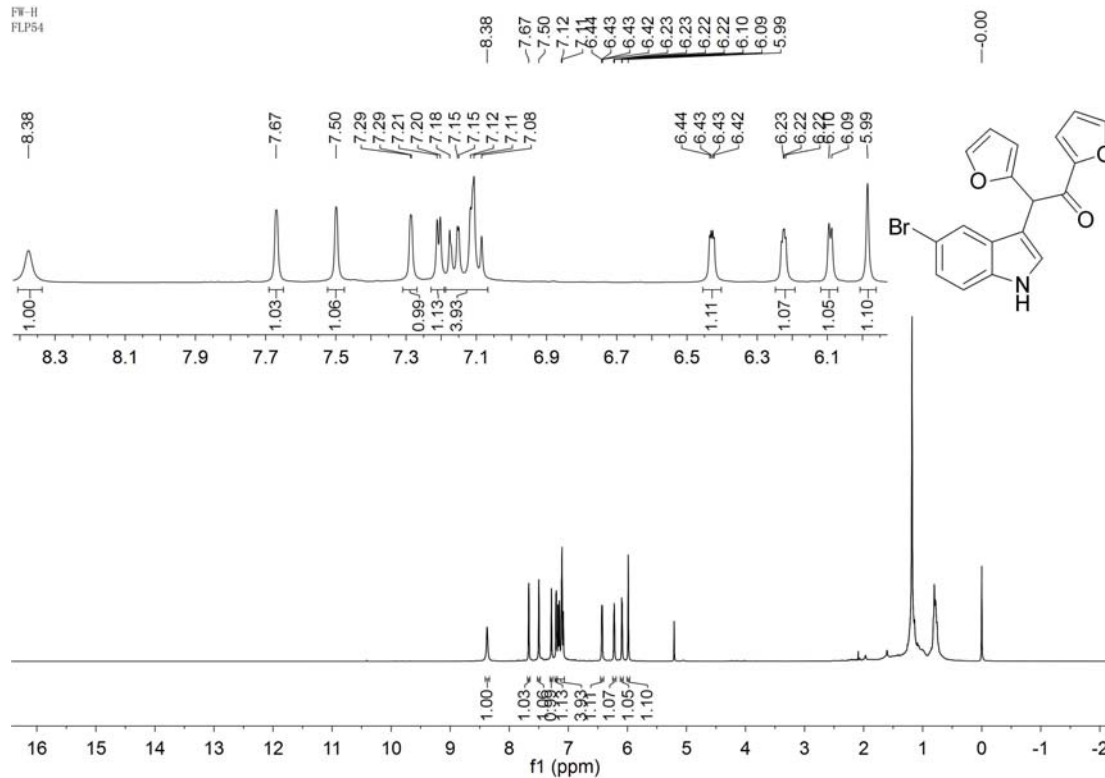

FW-C  
FLP54

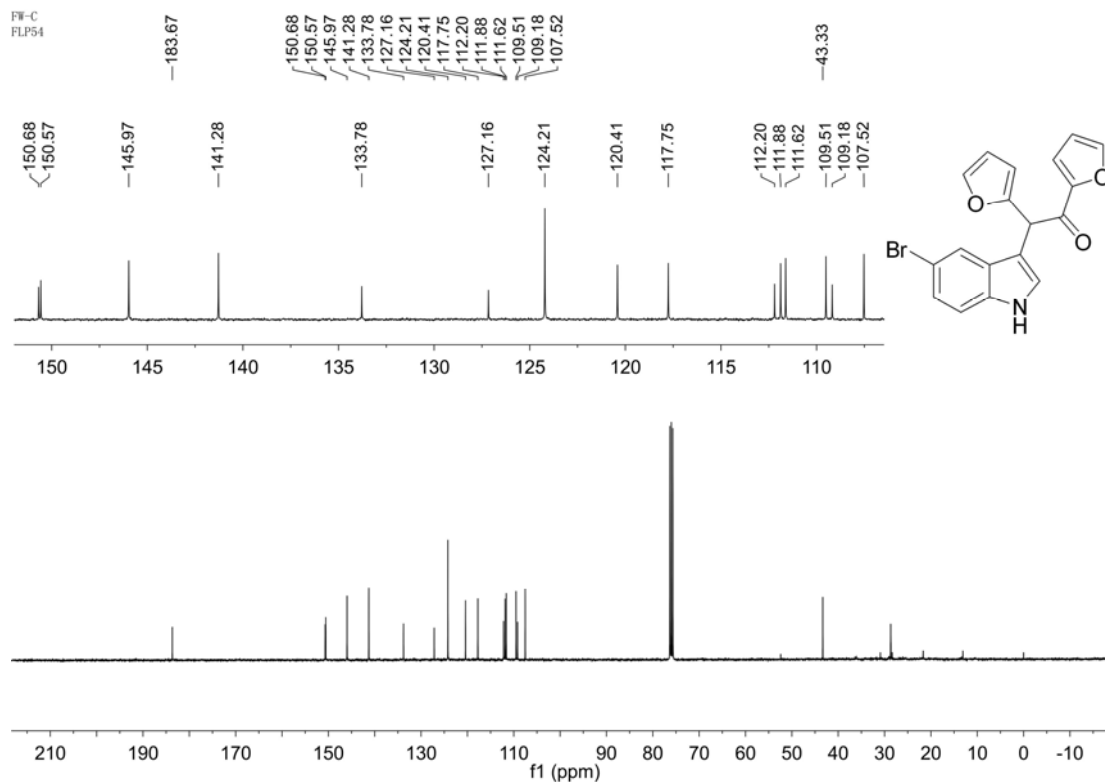

### 3i1

2014013YYGP15-d6

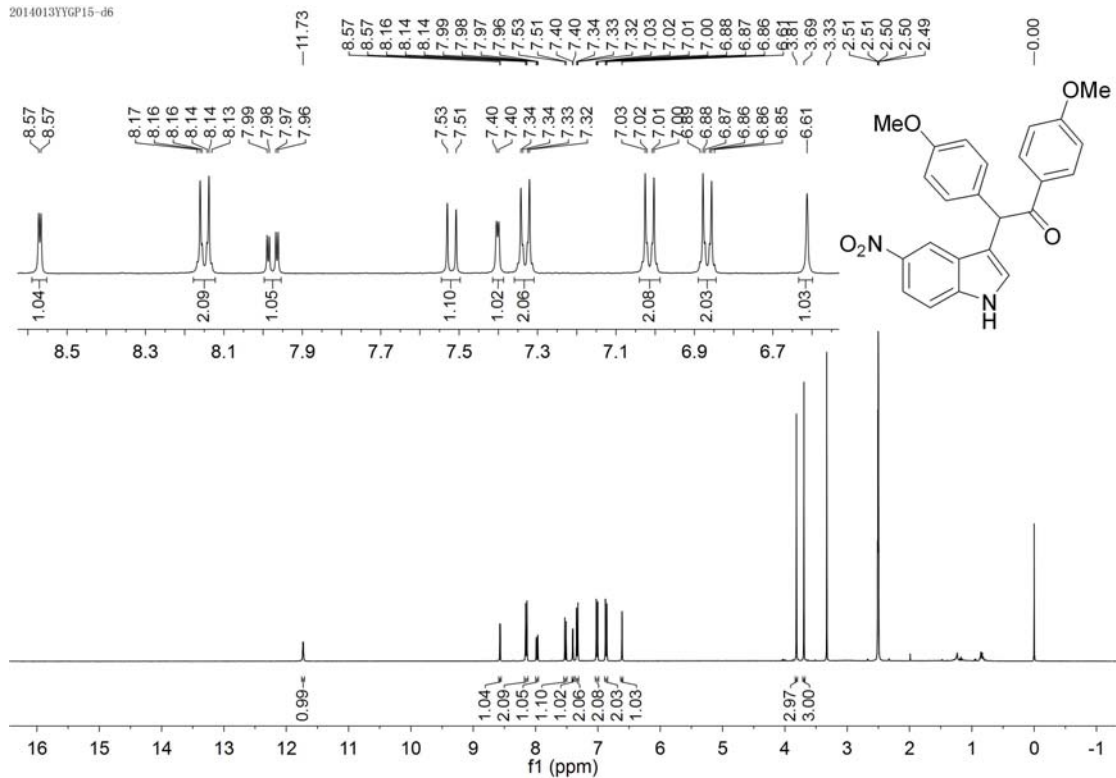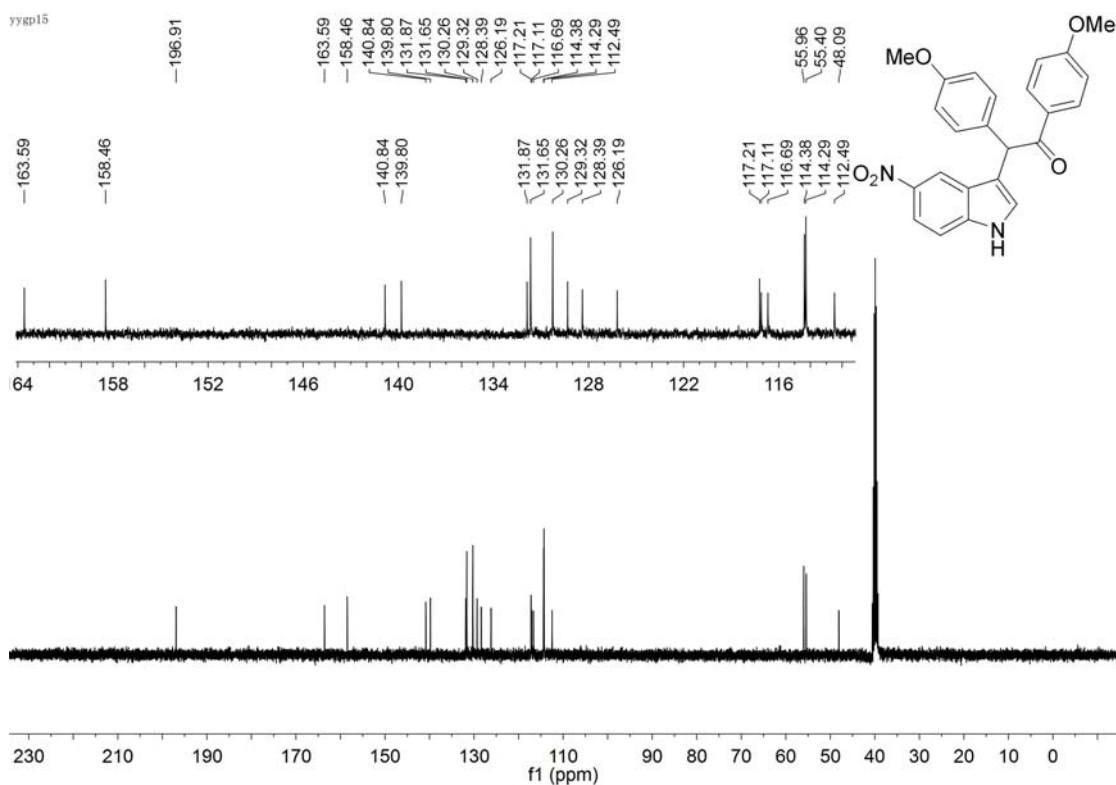

3i2

2014013FLP53-d1

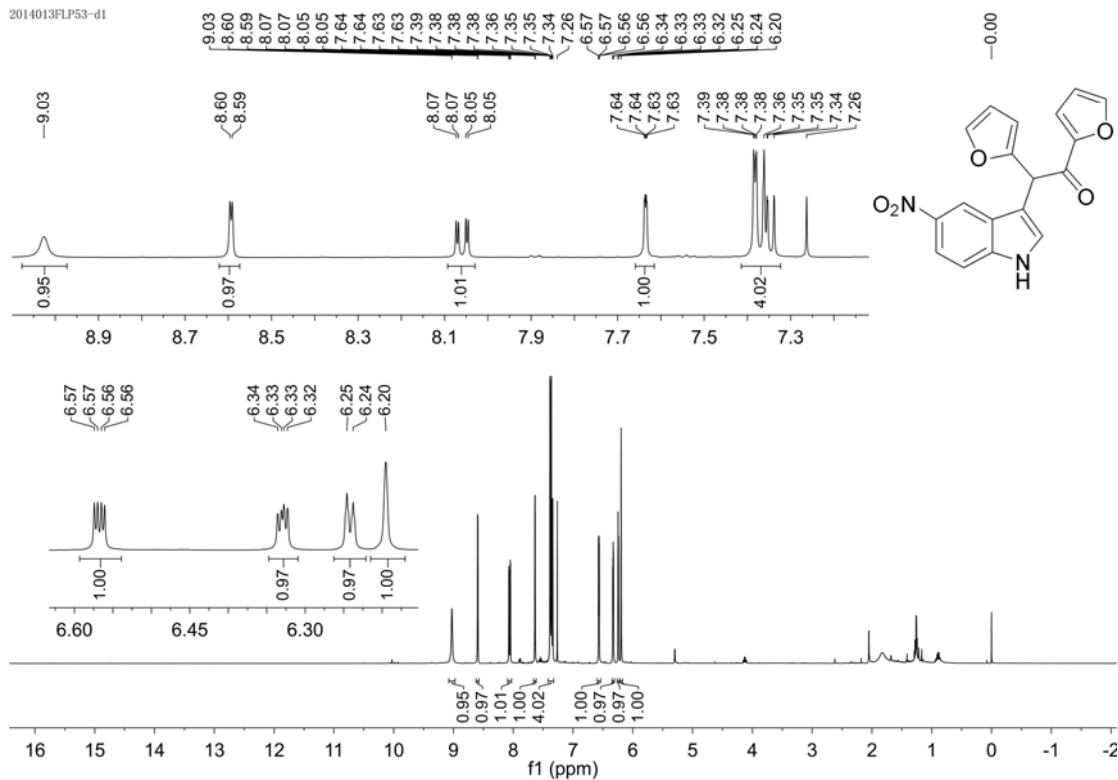

flp53 c

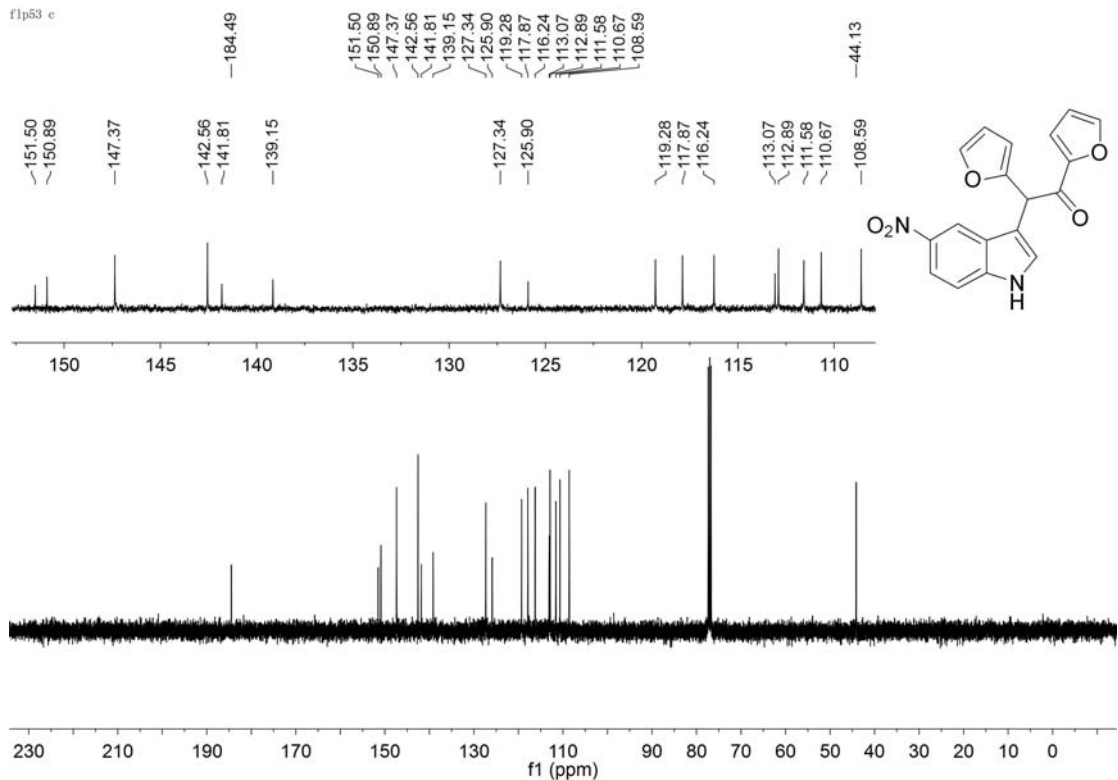

### 3j1

YYGP42  
PROTON DMSO D:\ \ ww 1

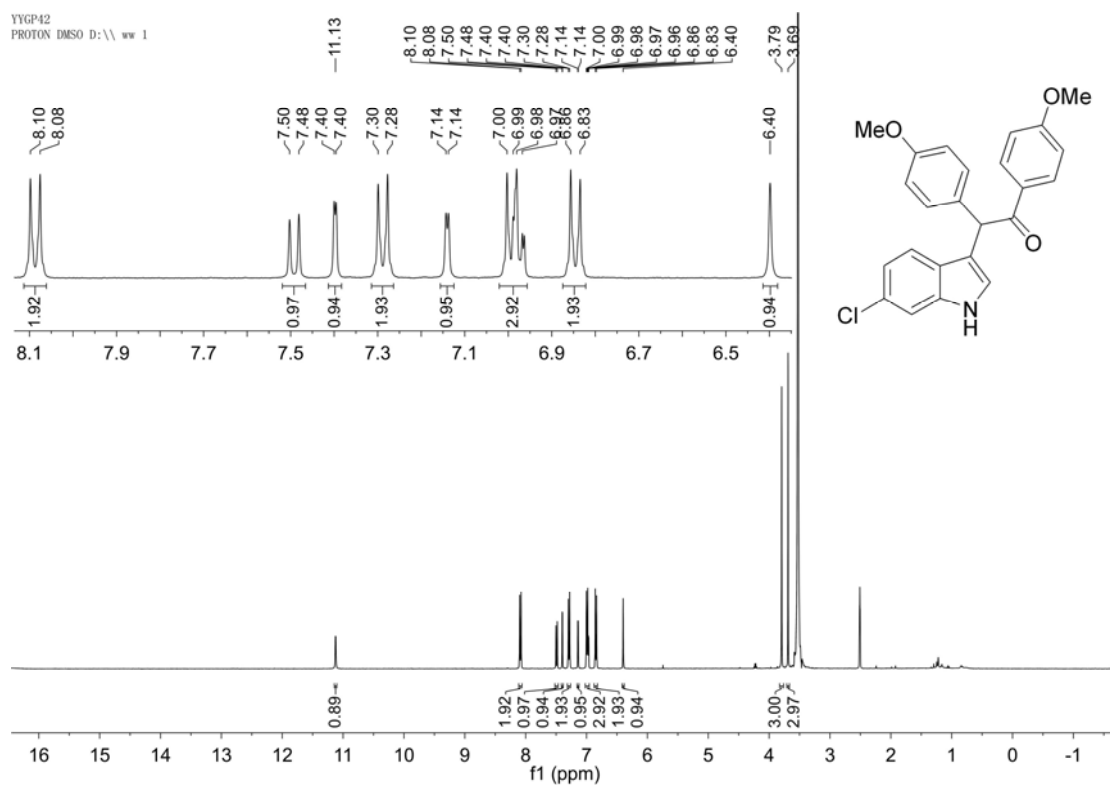

YYGP42  
C13CPD DMSO D:\ \ ww 1

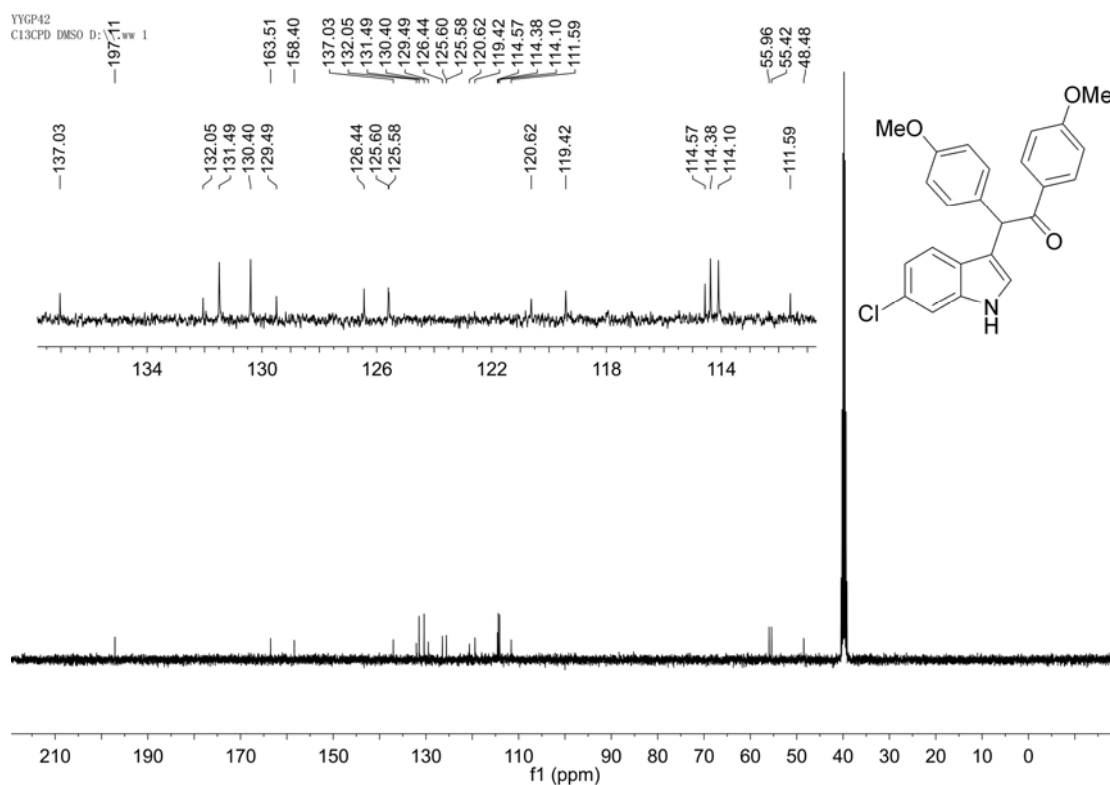

3j2

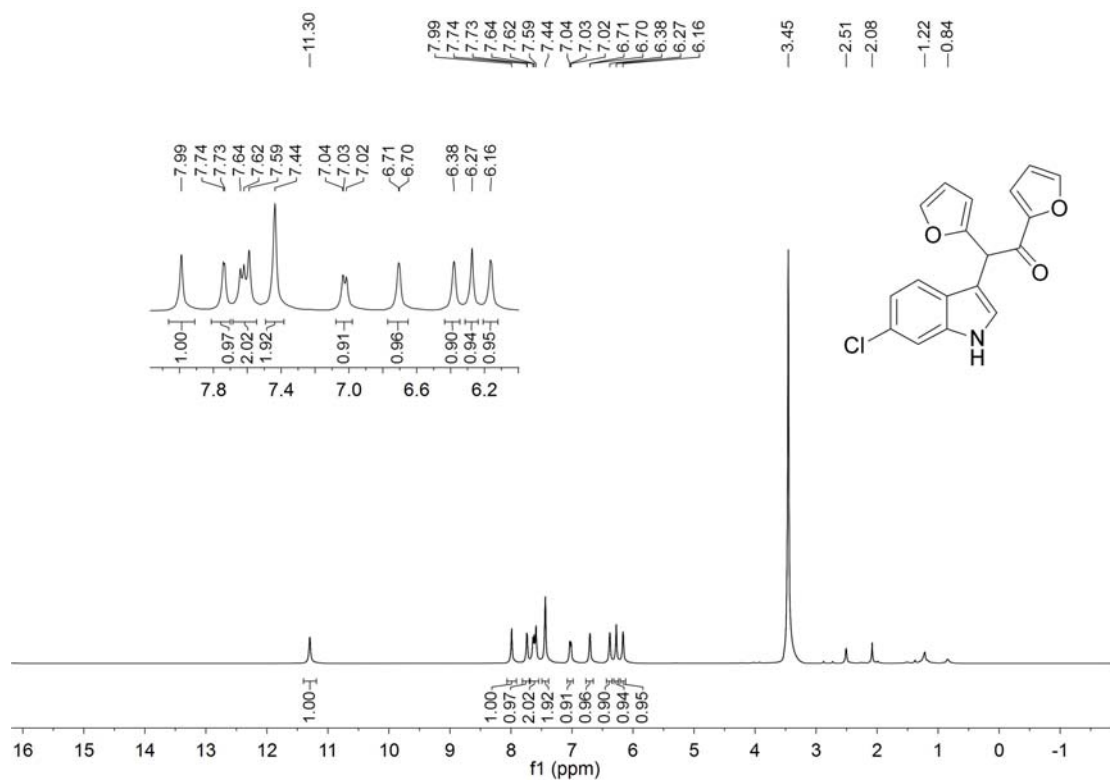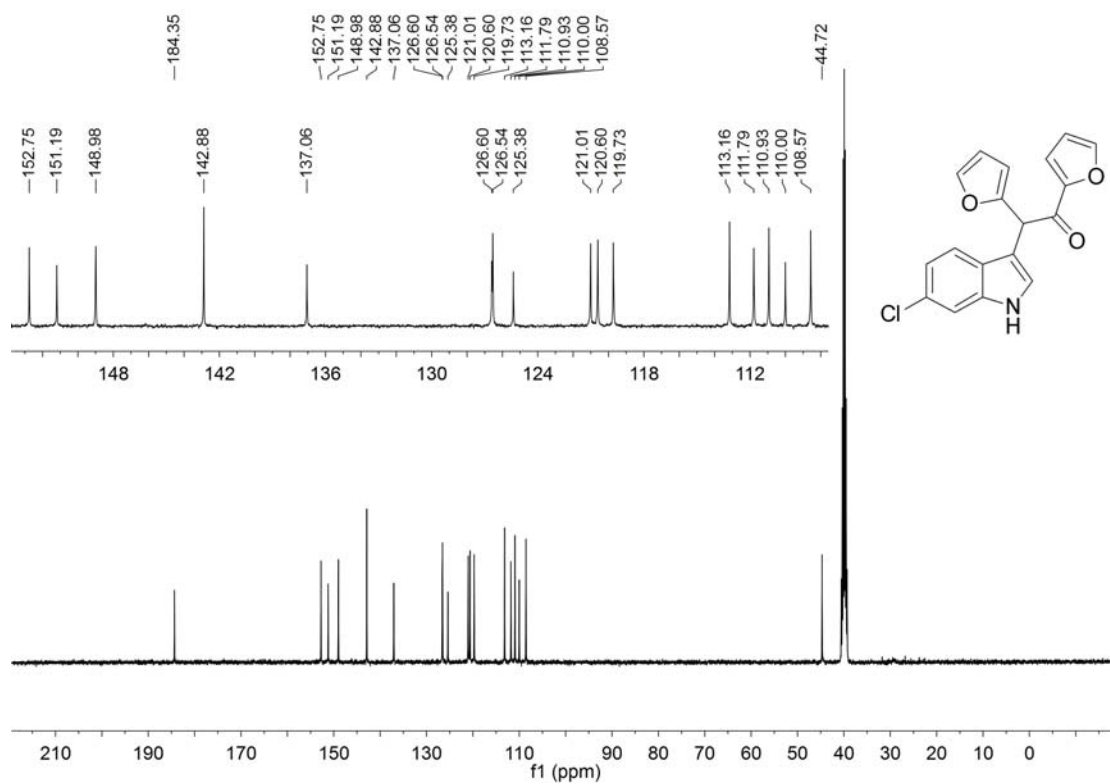



### 3k1

YYGP42B  
 PROTON CDC13 D:\w 1

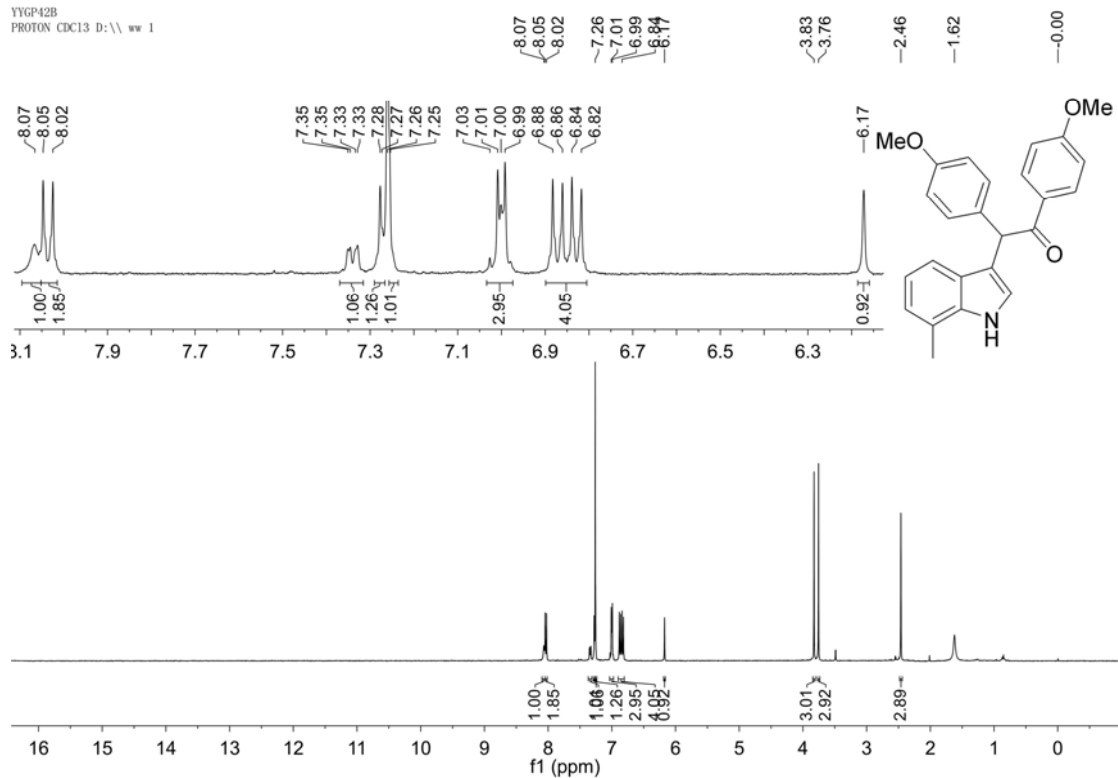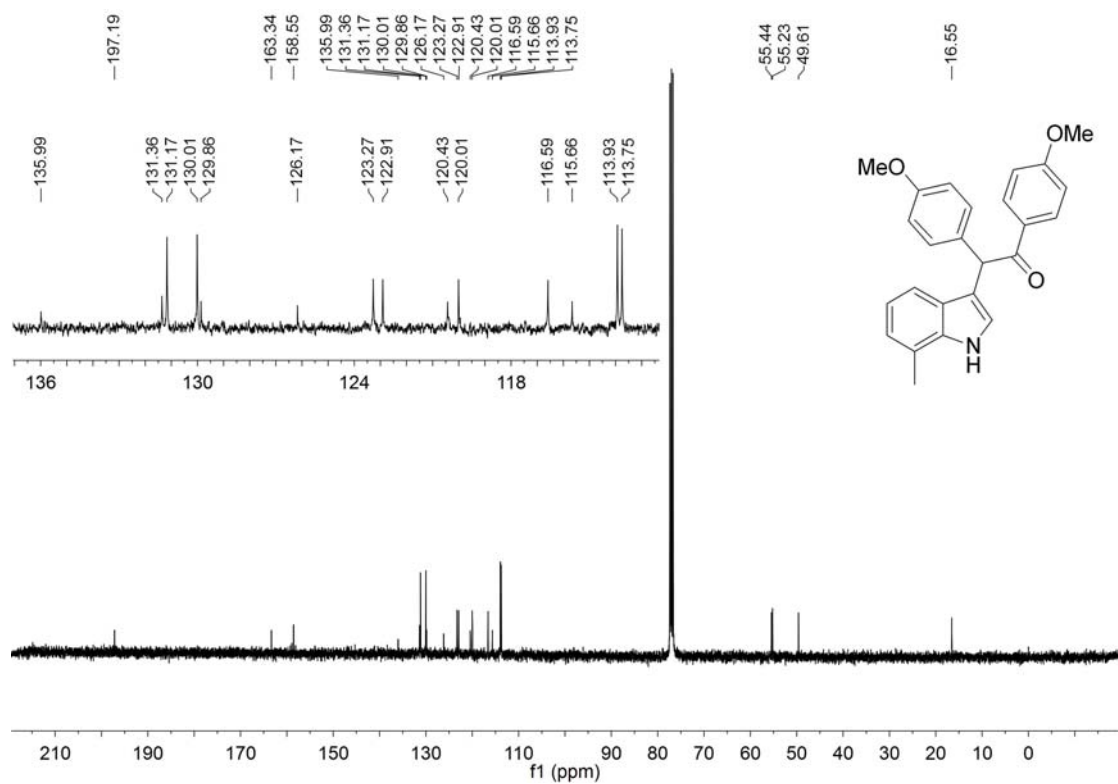

### 3k2

FW-H  
FLP47

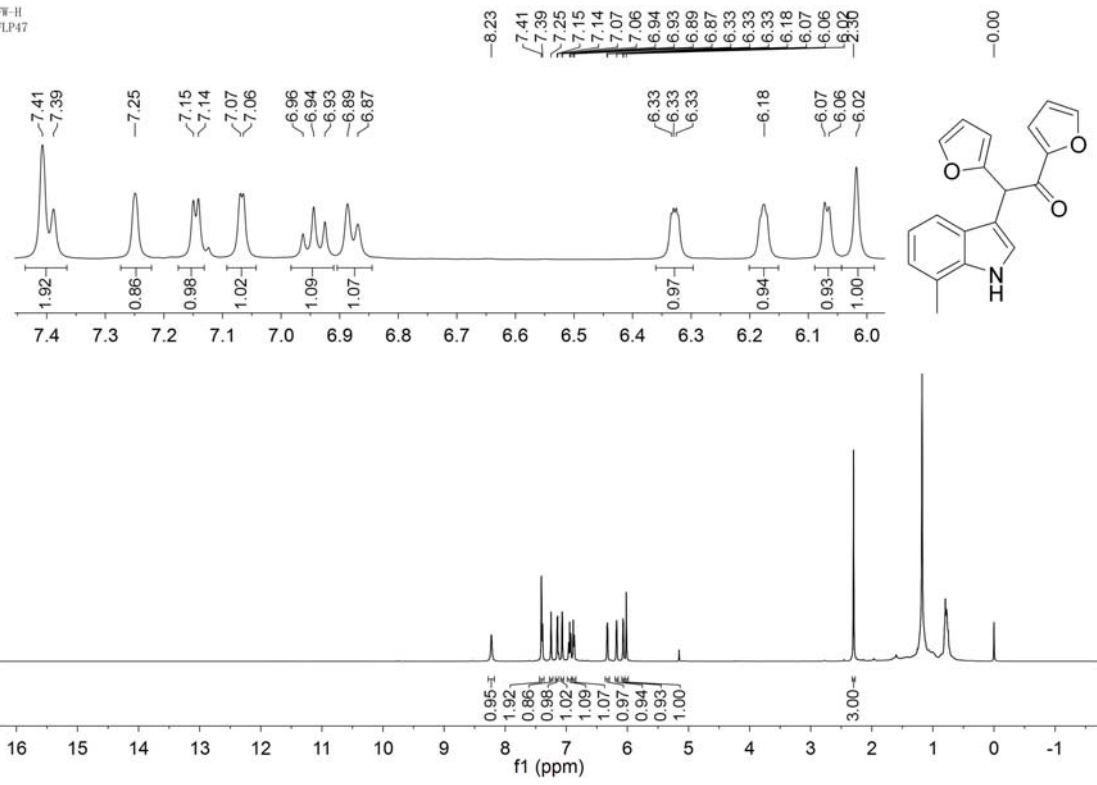

FW-C  
FLP47

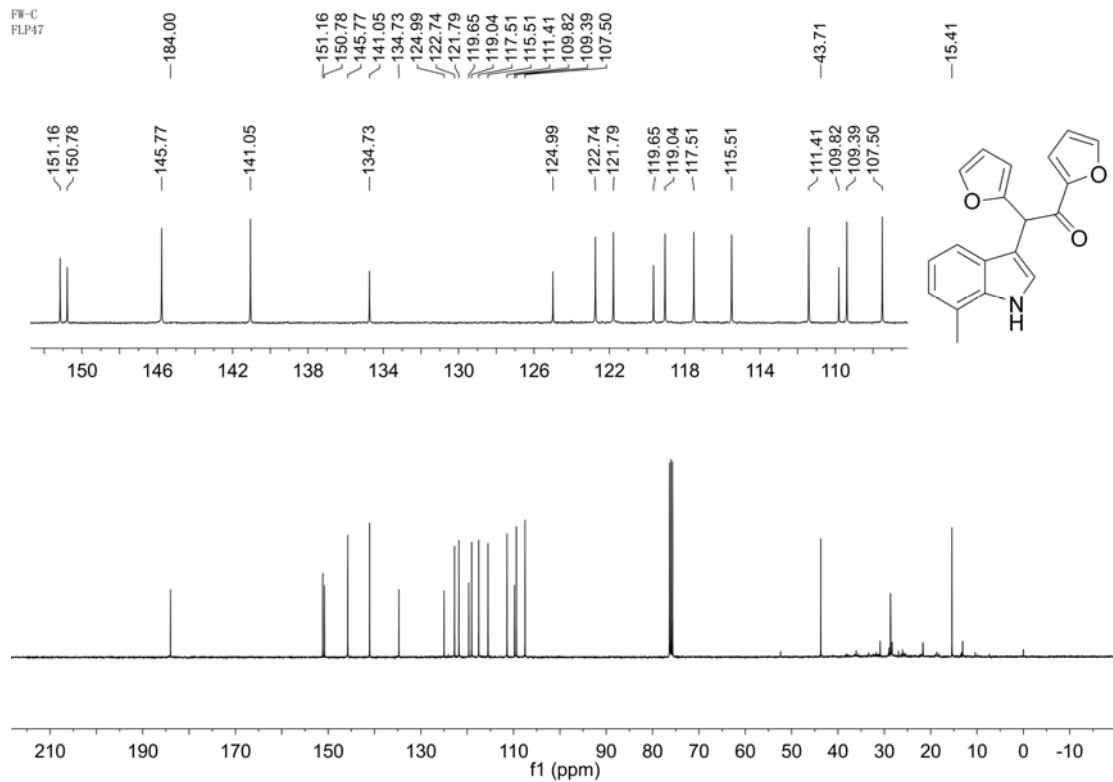

5a

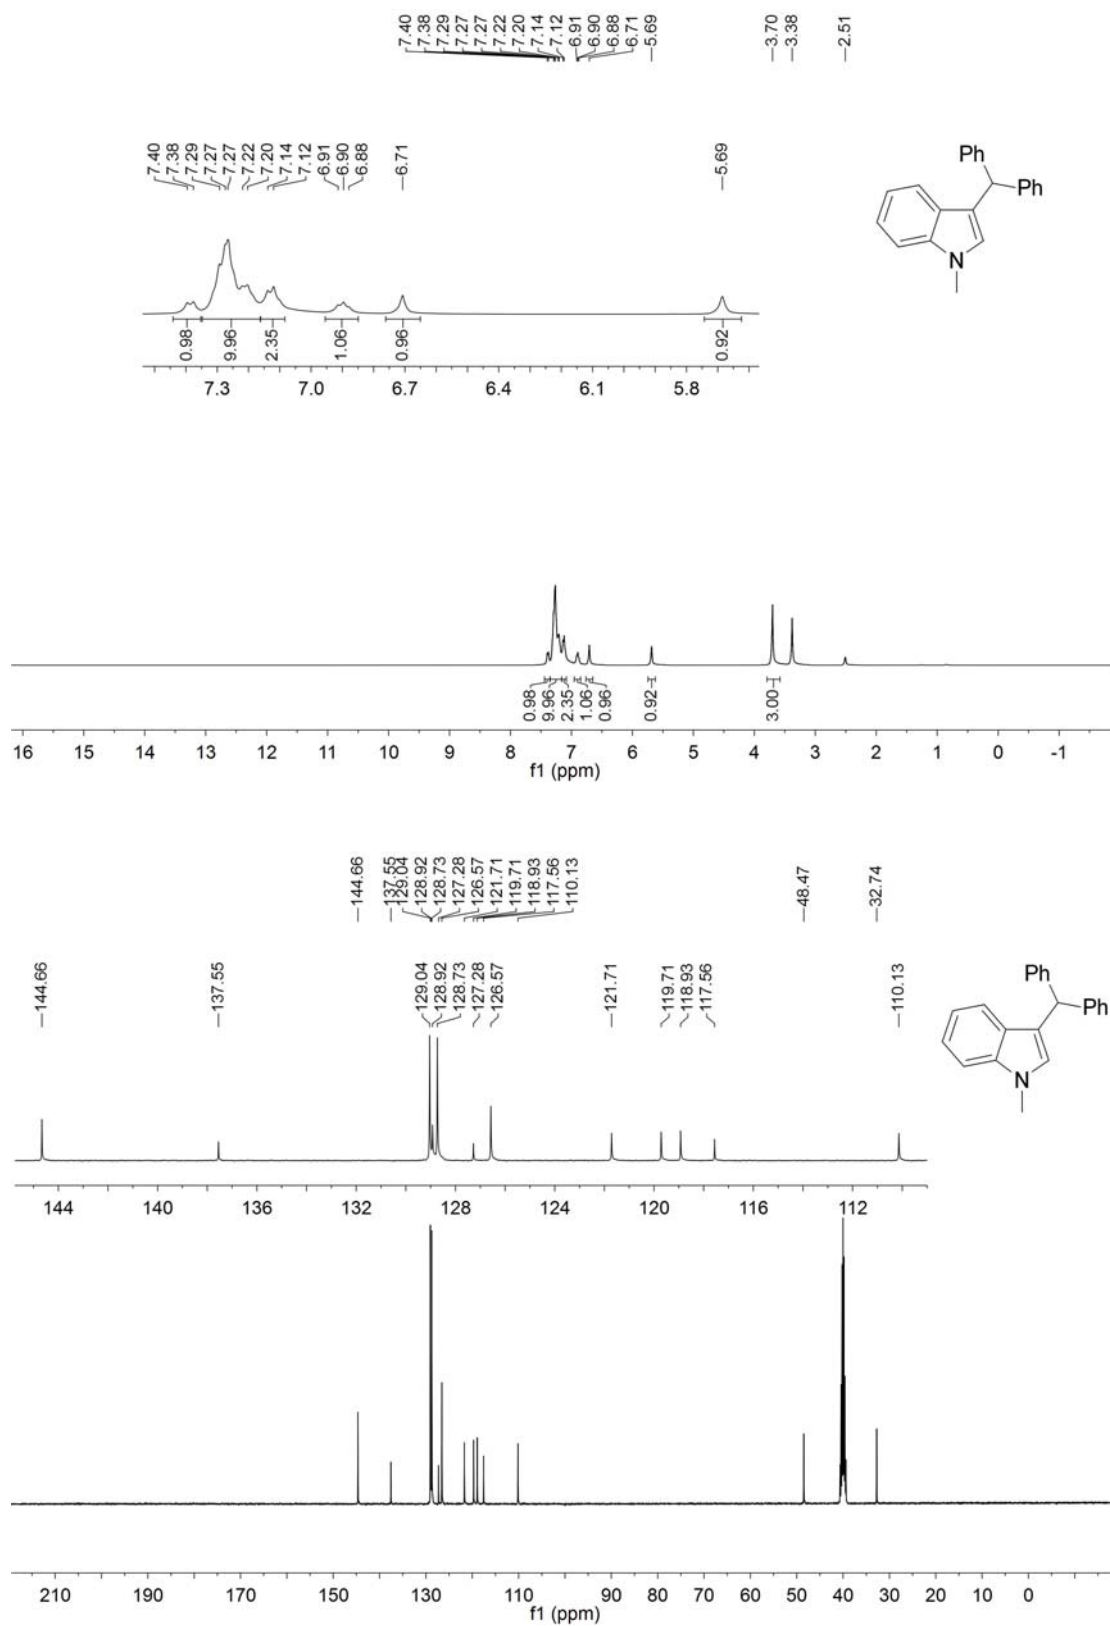

5b

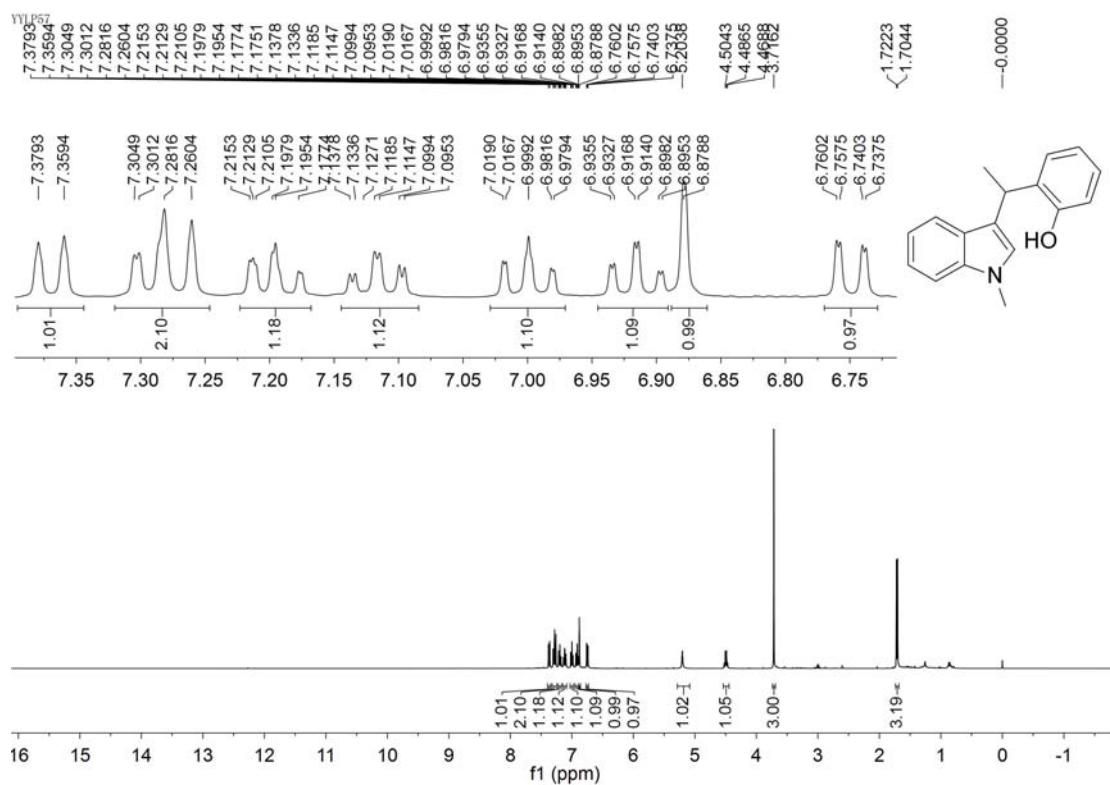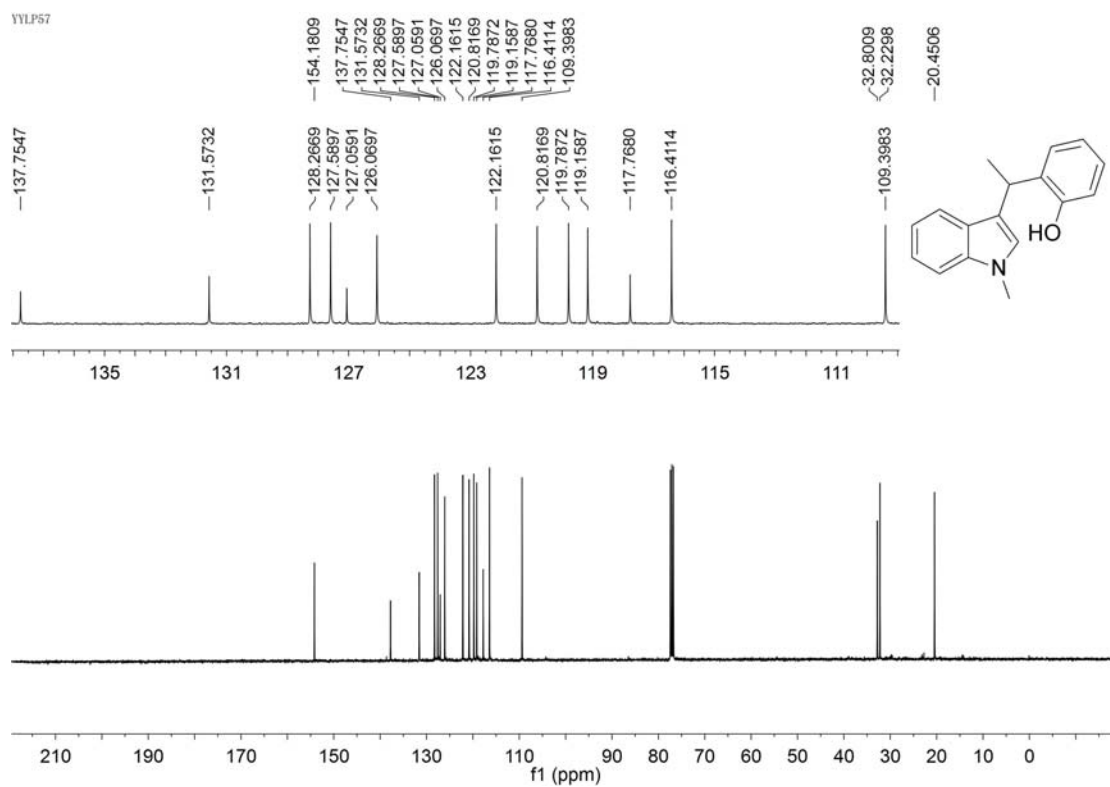

7

yylp14

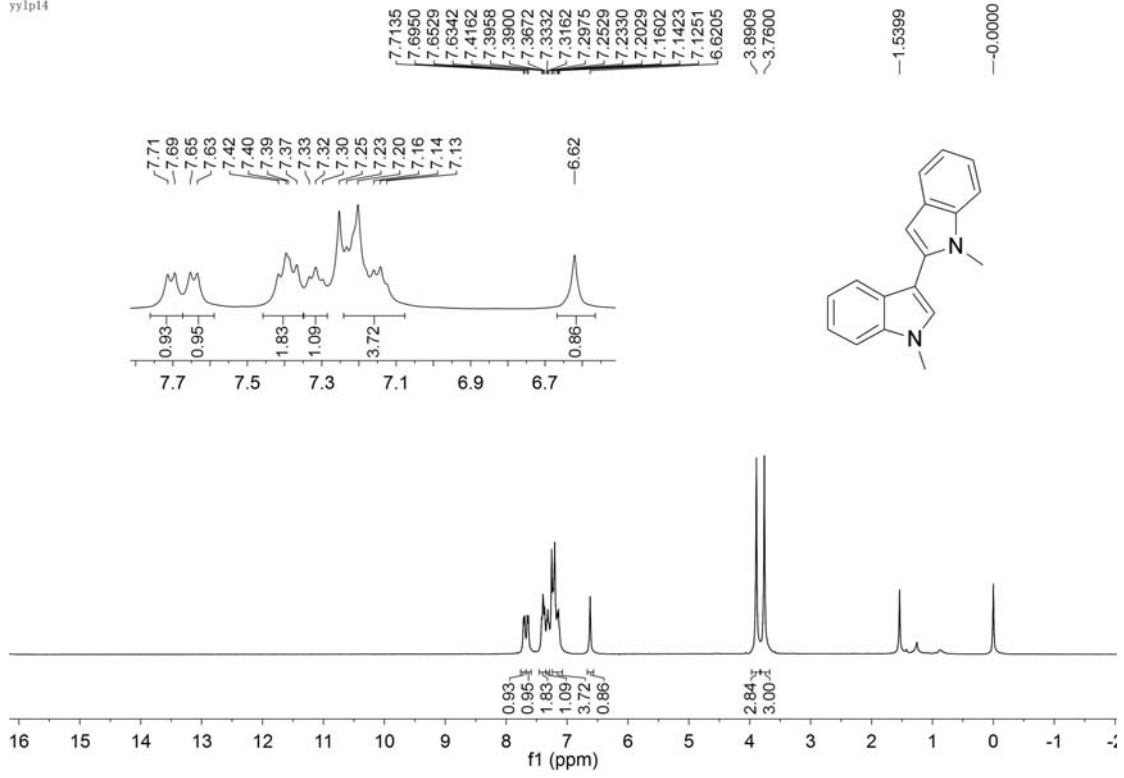

yylp14

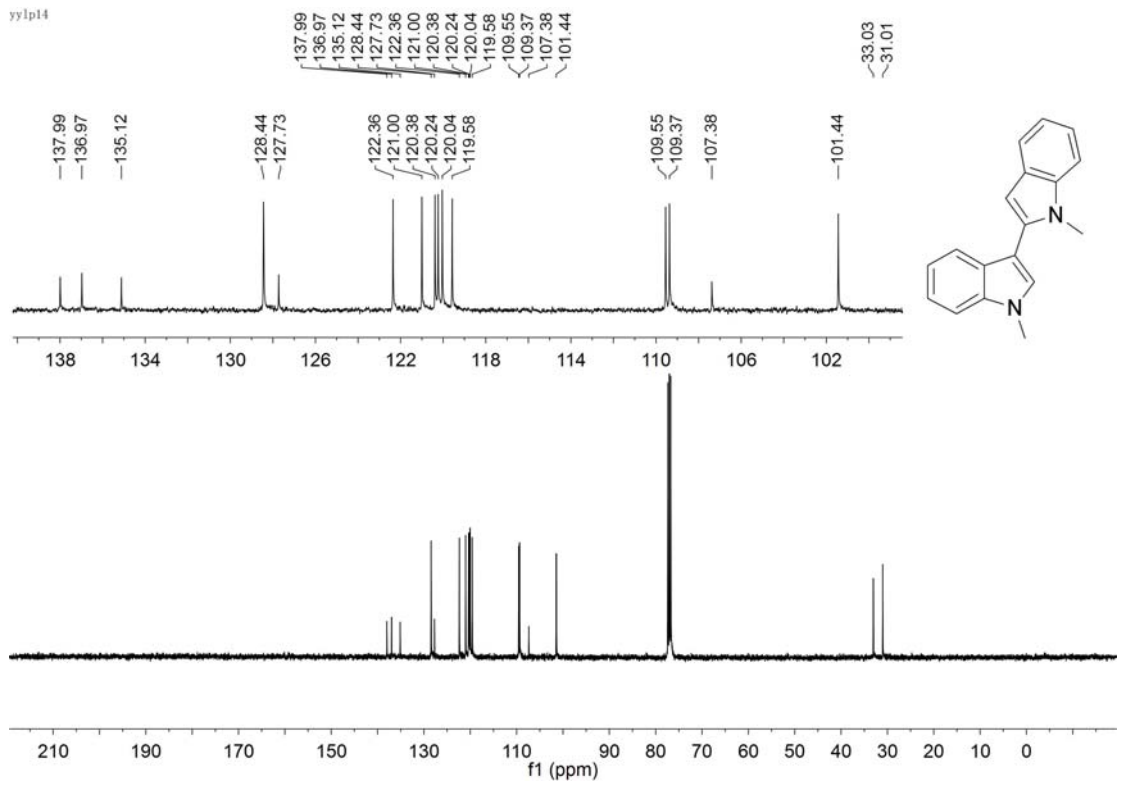

## V. Stability and charge calculations

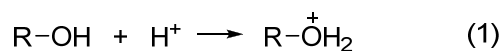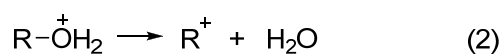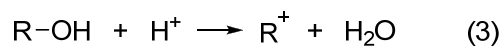

Benzyl cations are usually formed by reaction (1) and reaction (2). According to Hess's law states, the enthalpy of an overall reaction is the sum of the enthalpies of the individual reactions into which a reaction may be divided. The sum of enthalpies of reaction (1) and reaction (2) is equal to the enthalpy of reaction (3). So is Gibbs free energy. We use the Gibbs free energy change ( $\Delta G$ ) of reaction (3) to compare the stabilities of different benzyl cations, and cations with lower energy are more stable.

**Table S1.** Stabilities and natural population atomic charges (NPA) of the benzyl cations at the M062X/def2TZVP level of theory.

|                     | 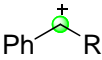 |             |                        |         |                     |
|---------------------|-----------------------------------------------------------------------------------|-------------|------------------------|---------|---------------------|
|                     | R = H                                                                             | R = C(=O)Ph | R = CO <sub>2</sub> Me | R = CN  | R = CF <sub>3</sub> |
| $\Delta G$ (kJ/mol) | -754.69                                                                           | -771.37     | -746.11                | -725.52 | -694.09             |
| NBO charge          | 0.029                                                                             | 0.140       | 0.114                  | 0.041   | 0.087               |

## Coordinates of optimised geometries

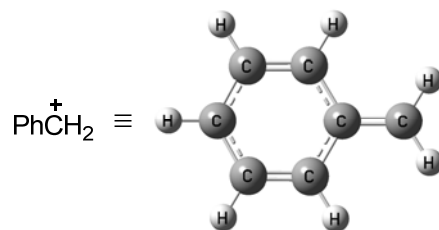

|   |             |             |             |
|---|-------------|-------------|-------------|
| C | -2.73855800 | 1.36401300  | -0.02350200 |
| C | -1.31052400 | 1.31264800  | 0.10348700  |
| C | -0.55943100 | 2.53276700  | 0.17417900  |
| C | -1.20928800 | 3.73377900  | 0.12057400  |
| C | -2.60657100 | 3.74767600  | -0.00417700 |
| C | -3.37176200 | 2.57396700  | -0.07588100 |
| H | -3.29472400 | 0.43568200  | -0.07608300 |
| H | 0.51856900  | 2.48105800  | 0.26988900  |
| H | -0.66276700 | 4.66511000  | 0.17211100  |
| H | -3.11580900 | 4.70408500  | -0.04736500 |
| H | -4.44689000 | 2.63541200  | -0.17174500 |
| C | -0.67125600 | 0.11244100  | 0.15595700  |
| H | -1.22048000 | -0.82179000 | 0.10443700  |
| H | 0.40782200  | 0.05199600  | 0.25101900  |

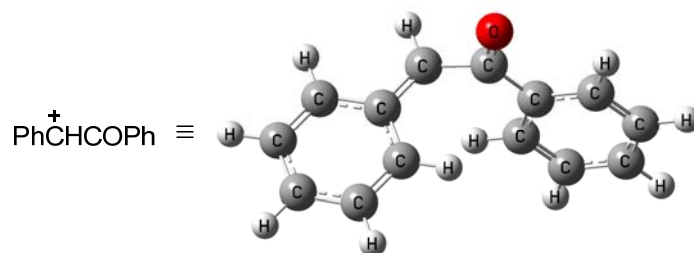

|   |             |            |            |
|---|-------------|------------|------------|
| C | -4.26327353 | 4.40005439 | 2.75107181 |
| C | -3.27203453 | 3.74474239 | 1.96245581 |
| C | -1.99421253 | 4.35435139 | 1.77991281 |
| C | -1.73013653 | 5.56148039 | 2.36991881 |
| C | -2.72018553 | 6.17857439 | 3.14588081 |
| C | -3.98094853 | 5.60460639 | 3.34059281 |
| H | -5.23244053 | 3.93184639 | 2.87432981 |
| H | -1.24780353 | 3.85741839 | 1.17125081 |

|   |             |             |             |
|---|-------------|-------------|-------------|
| H | -0.76966153 | 6.04044039  | 2.24004681  |
| H | -2.50313253 | 7.13460539  | 3.60822581  |
| H | -4.72060153 | 6.11289639  | 3.94315181  |
| C | -3.56159853 | 2.52334639  | 1.39790181  |
| H | -4.54640253 | 2.08513039  | 1.54441081  |
| C | -1.58192753 | 0.97203339  | 0.70535981  |
| C | -1.21455253 | 0.77162039  | 2.03721281  |
| C | -0.89160753 | 0.33659639  | -0.33036819 |
| C | -0.15235453 | -0.06464761 | 2.33473981  |
| H | -1.75560753 | 1.26205839  | 2.83948381  |
| C | 0.16824347  | -0.49470961 | -0.02538619 |
| H | -1.20342053 | 0.50312539  | -1.35373619 |
| C | 0.53545347  | -0.69283861 | 1.30345681  |
| H | 0.13928647  | -0.23013561 | 3.36278281  |
| H | 0.70950347  | -0.99486461 | -0.81693919 |
| H | 1.36574647  | -1.34681061 | 1.53694081  |
| C | -2.70792453 | 1.83253539  | 0.37234581  |
| O | -3.12738653 | 2.11982839  | -0.72316819 |

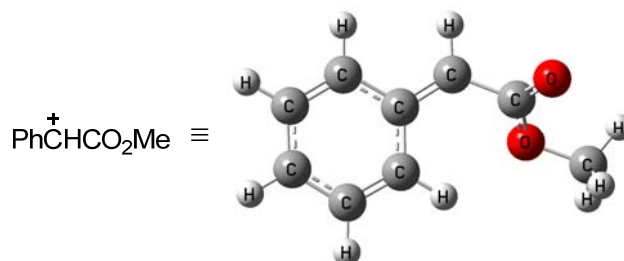

|   |             |            |            |
|---|-------------|------------|------------|
| C | -0.89729392 | 2.63440433 | 4.07521248 |
| C | -0.89134345 | 1.62062706 | 3.06183342 |
| C | -1.49434639 | 1.88824572 | 1.78958776 |
| C | -2.06332598 | 3.10919029 | 1.55641312 |
| C | -2.04711942 | 4.08141876 | 2.56740640 |
| C | -1.46826856 | 3.85106503 | 3.82193258 |
| H | -0.44390679 | 2.41818380 | 5.03524374 |
| H | -1.48322451 | 1.12200839 | 1.02592550 |
| H | -2.52314354 | 3.33148693 | 0.60361225 |
| H | -2.50020897 | 5.04651464 | 2.37081617 |
| H | -1.47979290 | 4.62701868 | 4.57448723 |



|   |             |             |             |
|---|-------------|-------------|-------------|
| C | -0.30296946 | 0.41835084  | 3.34419770  |
| H | 0.12705416  | 0.24738261  | 4.32756391  |
| C | -0.32579204 | -0.80165652 | 2.47368261  |
| O | -0.84616396 | -1.77949037 | 2.92126210  |
| O | 0.22819896  | -0.64306009 | 1.29539797  |
| C | 0.26313315  | -1.82692870 | 0.46035183  |
| H | -0.75288987 | -2.15599972 | 0.25438436  |
| H | 0.77294489  | -1.52245758 | -0.44627711 |
| H | 0.80993974  | -2.61388929 | 0.97520598  |

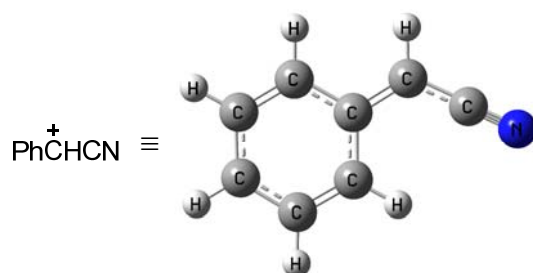

|   |             |             |             |
|---|-------------|-------------|-------------|
| C | -3.37541115 | 2.11433621  | 3.29168457  |
| C | -2.89216215 | 1.52939821  | 2.07367757  |
| C | -2.98292915 | 2.26117321  | 0.84179457  |
| C | -3.53181615 | 3.51088121  | 0.84301457  |
| C | -3.99686715 | 4.05678521  | 2.05131557  |
| C | -3.92083115 | 3.36633921  | 3.27083757  |
| H | -3.30083215 | 1.54994521  | 4.21364457  |
| H | -2.61341615 | 1.80893821  | -0.07142743 |
| H | -3.61041715 | 4.08118521  | -0.07220043 |
| H | -4.43102015 | 5.05055421  | 2.04043557  |
| H | -4.29170015 | 3.82575321  | 4.17648657  |
| C | -2.35265815 | 0.27172521  | 2.11975557  |
| H | -2.29229915 | -0.26935079 | 3.06065857  |
| C | -1.85017615 | -0.39982079 | 0.97939857  |
| N | -1.44251315 | -0.94721679 | 0.05446857  |

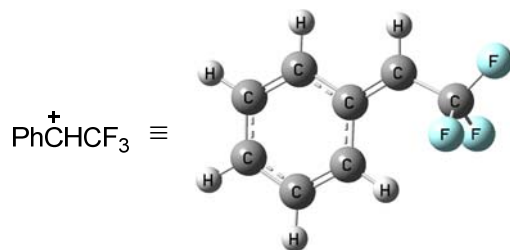

|   |             |             |             |
|---|-------------|-------------|-------------|
| C | -2.07543600 | 1.69040500  | 1.45329100  |
| C | -1.67547400 | 1.05013100  | 0.22687700  |
| C | -1.84588000 | 1.74518100  | -1.02430700 |
| C | -2.38426900 | 2.99866500  | -1.02580800 |
| C | -2.76346600 | 3.59117000  | 0.19077000  |
| C | -2.61253000 | 2.94480400  | 1.42671600  |
| H | -1.94260800 | 1.15802100  | 2.38760100  |
| H | -1.54697300 | 1.27033100  | -1.94967900 |
| H | -2.52108400 | 3.53863800  | -1.95241500 |
| H | -3.18969300 | 4.58839100  | 0.17220400  |
| H | -2.91900400 | 3.43939100  | 2.33788100  |
| C | -1.15114900 | -0.20071100 | 0.30389800  |
| H | -1.03768700 | -0.69559200 | 1.26438100  |
| C | -0.68819600 | -1.01607800 | -0.89789200 |
| F | -0.22617200 | -2.18373500 | -0.49905100 |
| F | -1.70626100 | -1.21038500 | -1.72902200 |
| F | 0.27253000  | -0.36461200 | -1.54415700 |

## VI. Calculations of the reaction mechanism

Geometries of molecules (**1a**, **2a**, **3a1**, and Br<sub>2</sub>) and complexes (**Com**, **Int1**, **Int2**, and **TS**) involved in the reaction pathway have been fully optimized by using density functional theory (DFT) in its M062X formulation with the 6-31G(d) basis sets.

**Table S2.** The crucial bond distances of complexes involved in the reaction pathway calculated at the SMD-M062X/6-31G(d) level.

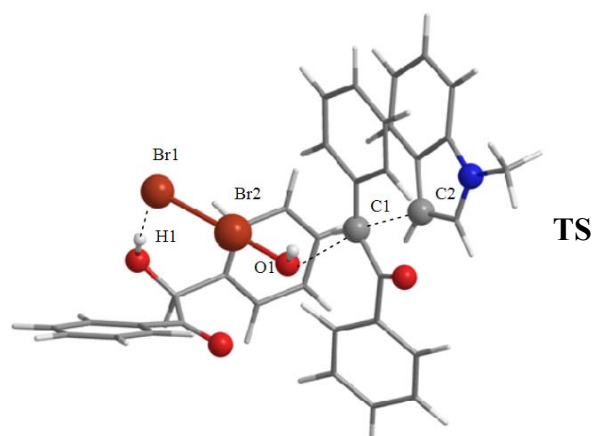

| Species     | Bond distance (angstroms) |                      |                     |                    |                    |
|-------------|---------------------------|----------------------|---------------------|--------------------|--------------------|
|             | R <sub>H1-Br1</sub>       | R <sub>Br1-Br2</sub> | R <sub>Br2-O1</sub> | R <sub>O1-C1</sub> | R <sub>C1-C2</sub> |
| <b>Com</b>  | 2.474                     | 2.316                | 2.513               | 1.442              | 3.885              |
| <b>TS</b>   | 2.323                     | 2.607                | 1.983               | 2.243              | 2.515              |
| <b>Int1</b> | 2.291                     | 2.838                | 1.904               | 3.052              | 1.575              |

**Table S3.** The natural population (e) analysis (NPA) for the involved atoms calculated at the SMD-M062X/6-31G(d) level.

| Species     | NBO charge |        |       |        |        |        |
|-------------|------------|--------|-------|--------|--------|--------|
|             | H1         | Br1    | Br2   | O1     | C1     | C2     |
| <b>Com</b>  | 0.488      | -0.097 | 0.066 | -0.758 | 0.004  | -0.361 |
| <b>TS</b>   | 0.496      | -0.537 | 0.169 | -0.856 | -0.016 | -0.321 |
| <b>Int1</b> | 0.494      | -0.705 | 0.217 | -0.863 | -0.316 | -0.323 |

## Coordinates of optimised geometries

### 1a

M062X/6-31g(d), SCRF=(smd,solvent=Acetonitrile), Int=UltraFine, E(RM062X) =-402.967393189

|   |             |             |             |
|---|-------------|-------------|-------------|
| C | 0.72971600  | 1.88937300  | 0.00000700  |
| C | -0.38690800 | 0.98779300  | -0.00000300 |
| C | 1.85843800  | 1.11348600  | -0.00000400 |
| C | 0.15327800  | -0.32529300 | -0.00001000 |
| C | -1.78476200 | 1.14281100  | 0.00001200  |
| H | 2.90240400  | 1.39877200  | 0.00000700  |
| C | -0.65327300 | -1.47088300 | 0.00000300  |
| C | -2.58682400 | 0.01328600  | 0.00000100  |
| H | -2.22664200 | 2.13563500  | 0.00001100  |
| C | -2.02593100 | -1.28189800 | -0.00000400 |
| H | -0.21821100 | -2.46611900 | 0.00000100  |
| H | -3.66737700 | 0.12173700  | -0.00000100 |
| H | -2.68339300 | -2.14618800 | -0.00001000 |
| N | 1.52250500  | -0.21935700 | -0.00002100 |
| C | 2.44357600  | -1.33809900 | 0.00001800  |
| H | 2.29569900  | -1.95512700 | 0.89112500  |
| H | 2.29517400  | -1.95557200 | -0.89069300 |
| H | 3.46320700  | -0.95115900 | -0.00040300 |
| H | 0.69775100  | 2.97007300  | -0.00000700 |

### 2a

M062X/6-31g(d), SCRF=(smd,solvent=Acetonitrile), Int=UltraFine, E(RM062X) =-690.880449905

|   |             |             |             |
|---|-------------|-------------|-------------|
| O | -0.16504900 | 1.85460700  | -0.44747300 |
| C | -0.47856900 | 0.67254400  | 0.26550800  |
| C | -1.93961100 | 0.28032300  | 0.18016200  |
| H | -0.23763800 | 0.88987100  | 1.31330900  |
| C | -2.39626000 | -0.84020800 | 0.88254200  |
| C | -2.84828900 | 1.03510000  | -0.55889500 |
| C | -3.73747300 | -1.20371200 | 0.83637400  |
| H | -1.69463000 | -1.42929100 | 1.46756900  |
| C | -4.19476800 | 0.66946200  | -0.60823900 |
| H | -2.51090500 | 1.92085700  | -1.08788600 |

|   |             |             |             |
|---|-------------|-------------|-------------|
| C | -4.64234700 | -0.44994100 | 0.08617700  |
| H | -4.07900700 | -2.07606400 | 1.38578700  |
| H | -4.89235700 | 1.26694800  | -1.18785600 |
| H | -5.68987500 | -0.73370200 | 0.04924700  |
| H | -0.29806400 | 1.67739300  | -1.39548800 |
| C | 0.47088000  | -0.45297100 | -0.20056100 |
| C | 1.94356300  | -0.22042700 | -0.05555100 |
| C | 2.47414100  | 0.89329600  | 0.60634500  |
| C | 2.80932900  | -1.18426100 | -0.58637700 |
| C | 3.85323500  | 1.03287800  | 0.73729800  |
| H | 1.82007100  | 1.65667700  | 1.01293100  |
| C | 4.18540400  | -1.03983700 | -0.45975300 |
| H | 2.38512600  | -2.04372800 | -1.09574000 |
| C | 4.70886100  | 0.06999400  | 0.20473000  |
| H | 4.26032900  | 1.89653000  | 1.25380300  |
| H | 4.85072700  | -1.79003100 | -0.87584900 |
| H | 5.78398300  | 0.18426000  | 0.30683900  |
| O | 0.04675800  | -1.47875200 | -0.69317900 |

### 3a1

M062X/6-31g(d), SCRF=(smd,solvent=Acetonitrile), Int=UltraFine, E(RM062X)=-1017.48021572

|   |             |            |             |
|---|-------------|------------|-------------|
| C | -0.08650000 | 0.90958300 | -0.31565200 |
| C | 0.89372000  | 2.06088600 | -0.18336500 |
| C | 1.48883400  | 2.36646000 | 1.04422900  |
| C | 1.21384500  | 2.83449400 | -1.30017800 |
| C | 2.38306400  | 3.42730800 | 1.15149000  |
| H | 1.25316100  | 1.76303300 | 1.91656600  |
| C | 2.11342200  | 3.89583500 | -1.19732000 |
| H | 0.75629700  | 2.60244600 | -2.25932400 |
| C | 2.69985600  | 4.19491900 | 0.02960000  |
| H | 2.83833300  | 3.65413000 | 2.11127600  |
| H | 2.35634000  | 4.48453600 | -2.07714700 |
| H | 3.40287200  | 5.01846300 | 0.11311000  |
| C | -1.42772600 | 1.20990000 | 0.36365200  |
| C | -2.63956400 | 0.44492400 | -0.08432900 |

|   |             |             |             |
|---|-------------|-------------|-------------|
| C | -2.57785700 | -0.59812600 | -1.01564600 |
| C | -3.87491100 | 0.80173000  | 0.46777900  |
| C | -3.73831100 | -1.27253000 | -1.38568400 |
| H | -1.62851600 | -0.90064700 | -1.44726900 |
| C | -5.03361500 | 0.13145500  | 0.09300500  |
| H | -3.90983500 | 1.61070200  | 1.19058700  |
| C | -4.96588500 | -0.90836400 | -0.83454700 |
| H | -3.68308200 | -2.08366900 | -2.10504200 |
| H | -5.98876900 | 0.41736100  | 0.52270000  |
| H | -5.86934100 | -1.43525500 | -1.12696600 |
| O | -1.51111900 | 2.02203000  | 1.26405700  |
| C | 0.43983700  | -0.39159200 | 0.23734900  |
| C | 1.28688800  | -1.31888900 | -0.46153500 |
| C | 0.23609400  | -0.92381300 | 1.48653700  |
| C | 1.54907000  | -2.38743500 | 0.43213200  |
| C | 1.84205500  | -1.35029100 | -1.75156400 |
| N | 0.89791900  | -2.12120800 | 1.61190000  |
| H | -0.34710400 | -0.54423400 | 2.31704800  |
| C | 2.34485300  | -3.48236300 | 0.07246300  |
| C | 2.62946000  | -2.43199500 | -2.11172100 |
| H | 1.65815800  | -0.53743300 | -2.45002200 |
| C | 0.91377500  | -2.97392100 | 2.78399500  |
| C | 2.87732900  | -3.48685600 | -1.20736700 |
| H | 2.53579600  | -4.29368300 | 0.76879900  |
| H | 3.06689000  | -2.47234300 | -3.10471500 |
| H | 0.52151300  | -3.96502300 | 2.53904600  |
| H | 1.93243000  | -3.07719300 | 3.16904400  |
| H | 0.28596000  | -2.52194700 | 3.55259400  |
| H | 3.49952700  | -4.31962300 | -1.52136800 |
| H | -0.28350200 | 0.76468700  | -1.38461400 |

## Br<sub>2</sub>

M062X/6-31g(d), SCRF=(smd,solvent=Acetonitrile), Int=UltraFine, E(RM062X)=-5143.53969222

|    |            |            |            |
|----|------------|------------|------------|
| Br | 0.00000000 | 0.00000000 | 1.14289800 |
|----|------------|------------|------------|

|    |            |            |             |
|----|------------|------------|-------------|
| Br | 0.00000000 | 0.00000000 | -1.14289800 |
|----|------------|------------|-------------|

**Com**

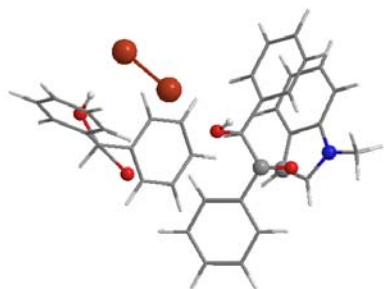

M062X/6-31g(d), SCRF=(smd,solvent=Acetonitrile), Int=UltraFine, E(RM062X) = -6928.31349375

|   |             |             |             |
|---|-------------|-------------|-------------|
| C | 1.30435800  | 0.08057500  | -1.17922100 |
| C | 1.97259300  | -1.26853900 | -1.23337800 |
| H | 3.40804600  | 2.06171400  | 1.94828100  |
| C | 2.65036200  | -1.72232700 | -2.37121800 |
| C | 1.79179500  | -2.13866800 | -0.15278500 |
| C | 3.15033000  | -3.02304600 | -2.41367400 |
| H | 2.79033800  | -1.06186400 | -3.22015400 |
| C | 2.27930500  | -3.44181600 | -0.20306000 |
| H | 1.25128000  | -1.79048600 | 0.72502100  |
| C | 2.96374600  | -3.88464300 | -1.33369900 |
| H | 3.68033000  | -3.36541200 | -3.29758600 |
| H | 2.13208500  | -4.10681000 | 0.64273400  |
| H | 3.35029900  | -4.89877500 | -1.37368900 |
| C | 2.10325100  | 1.29125700  | -1.68647100 |
| C | 1.55493000  | 2.63923200  | -1.33970200 |
| C | 0.32602900  | 2.80794900  | -0.68997100 |
| C | 2.31530900  | 3.76311100  | -1.68749800 |
| C | -0.13143900 | 4.09022600  | -0.39657200 |
| H | -0.30443400 | 1.96094500  | -0.43341200 |
| C | 1.86173600  | 5.03964200  | -1.38070000 |
| H | 3.26217200  | 3.61686200  | -2.19864900 |
| C | 0.63511100  | 5.20381300  | -0.73391400 |
| H | -1.09364400 | 4.20653300  | 0.09222700  |
| H | 2.45880300  | 5.90676400  | -1.64574900 |
| H | 0.27710200  | 6.20149300  | -0.49733600 |

|    |             |             |             |
|----|-------------|-------------|-------------|
| O  | 3.09706100  | 1.16926400  | -2.37492500 |
| O  | -4.07894500 | 0.09880900  | 2.45912400  |
| C  | -3.37726600 | 1.20898600  | 1.94835600  |
| C  | -1.91011800 | 1.20738800  | 2.34191500  |
| H  | -3.85011500 | 2.09529200  | 2.39285500  |
| C  | -1.24734500 | 2.41581800  | 2.55937500  |
| C  | -1.21092600 | 0.00753500  | 2.48778600  |
| C  | 0.09651000  | 2.42969100  | 2.92631200  |
| H  | -1.79375100 | 3.34973000  | 2.45379900  |
| C  | 0.13382500  | 0.01807100  | 2.85562900  |
| H  | -1.71670600 | -0.94226500 | 2.33695600  |
| C  | 0.78754300  | 1.22902200  | 3.08134700  |
| H  | 0.60025500  | 3.37614400  | 3.10147500  |
| H  | 0.66736000  | -0.92039600 | 2.98277300  |
| H  | 1.82586100  | 1.23689600  | 3.39649300  |
| H  | -3.93946200 | -0.66096700 | 1.87091500  |
| C  | -3.52417900 | 1.41274800  | 0.42261700  |
| C  | -4.62616200 | 0.74342700  | -0.33783600 |
| C  | -5.85304100 | 0.38366700  | 0.23336900  |
| C  | -4.39884500 | 0.50427600  | -1.69974200 |
| C  | -6.83258000 | -0.21869000 | -0.55224600 |
| H  | -6.04500000 | 0.57890300  | 1.28192100  |
| C  | -5.36886300 | -0.12050300 | -2.47236400 |
| H  | -3.44645400 | 0.79660500  | -2.13040600 |
| C  | -6.58797400 | -0.48327500 | -1.89798700 |
| H  | -7.78671900 | -0.48674000 | -0.10912500 |
| H  | -5.18016000 | -0.32037700 | -3.52267200 |
| H  | -7.34876600 | -0.96874300 | -2.50216500 |
| O  | -2.73953600 | 2.14372100  | -0.15057400 |
| Br | -1.64730800 | -1.26102100 | -0.72474600 |
| Br | -3.27288700 | -2.50341700 | 0.36000600  |
| C  | 3.96002700  | 1.34167200  | 1.36106700  |
| C  | 4.19626500  | -0.04411100 | 1.66035900  |
| C  | 4.59873100  | 1.59857200  | 0.17658600  |
| C  | 4.98801200  | -0.55509800 | 0.59601700  |



|   |            |             |             |
|---|------------|-------------|-------------|
| C | 3.84239800 | -0.91196300 | 2.70963400  |
| N | 5.21431600 | 0.46638200  | -0.29313900 |
| H | 4.66263800 | 2.51628900  | -0.39371600 |
| C | 5.42864100 | -1.88326400 | 0.55280000  |
| C | 4.27581800 | -2.22860500 | 2.67160800  |
| H | 3.24774300 | -0.55449600 | 3.54624100  |
| C | 5.91315000 | 0.33069900  | -1.55413000 |
| C | 5.06418800 | -2.70873700 | 1.60500500  |
| H | 6.03049000 | -2.25066400 | -0.27372500 |
| H | 4.00939900 | -2.90415900 | 3.47927900  |
| H | 6.93916800 | -0.00996600 | -1.38684500 |
| H | 5.39244900 | -0.38302500 | -2.19956600 |
| H | 5.93255800 | 1.30260500  | -2.04783300 |
| H | 5.38411000 | -3.74676000 | 1.60459000  |
| H | 0.99936300 | 0.27978500  | -0.14641000 |
| O | 0.08315800 | 0.09124200  | -1.94544600 |
| H | 0.26472500 | -0.33284800 | -2.80574300 |

### Int1

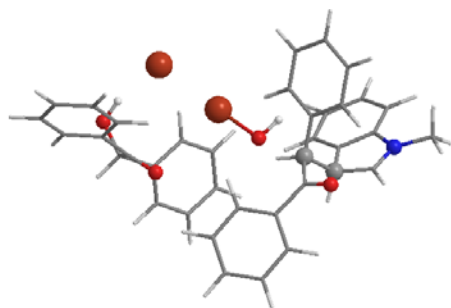

M062X/6-31g(d), SCRF=(smd,solvent=Acetonitrile), Int=UltraFine, E(RM062X)=-6928.29410551

|   |            |             |             |
|---|------------|-------------|-------------|
| C | 2.46979600 | 0.51003100  | -0.51452900 |
| C | 2.54943500 | -0.96624500 | -0.85621900 |
| H | 3.72748800 | 2.08718700  | 0.33075800  |
| C | 3.27949500 | -1.45775400 | -1.94754200 |
| C | 1.91446300 | -1.87899900 | -0.00779200 |
| C | 3.36587800 | -2.83041500 | -2.17765000 |
| H | 3.76556300 | -0.77088600 | -2.63284600 |
| C | 2.00463400 | -3.24956100 | -0.23600700 |
| H | 1.32306100 | -1.50676300 | 0.82459300  |

|   |             |             |             |
|---|-------------|-------------|-------------|
| C | 2.73400100  | -3.72992300 | -1.32087300 |
| H | 3.93055800  | -3.19437400 | -3.03090700 |
| H | 1.49573300  | -3.93921500 | 0.43079900  |
| H | 2.80577300  | -4.79818600 | -1.50212800 |
| C | 2.15989500  | 1.45988500  | -1.67766400 |
| C | 1.21268500  | 2.59342100  | -1.44922800 |
| C | 0.02142600  | 2.46099400  | -0.72776800 |
| C | 1.55545500  | 3.82694000  | -2.01582200 |
| C | -0.82146800 | 3.56211800  | -0.59238300 |
| H | -0.29181100 | 1.49578500  | -0.33461400 |
| C | 0.72683900  | 4.93041900  | -1.84641900 |
| H | 2.47859000  | 3.90956100  | -2.58169200 |
| C | -0.46537500 | 4.79602400  | -1.13509100 |
| H | -1.76456700 | 3.43719600  | -0.07179400 |
| H | 1.00474300  | 5.88907300  | -2.27381300 |
| H | -1.12279700 | 5.65194300  | -1.01250800 |
| O | 2.81102100  | 1.39750800  | -2.70585700 |
| O | -4.16900500 | -0.29469300 | 2.52622800  |
| C | -3.69496800 | 0.86787100  | 1.89079300  |
| C | -2.27178000 | 1.23292200  | 2.27012800  |
| H | -4.35357000 | 1.68840800  | 2.21366600  |
| C | -1.95107900 | 2.54567200  | 2.61584500  |
| C | -1.26647700 | 0.26110800  | 2.27550900  |
| C | -0.64398200 | 2.89559000  | 2.95673500  |
| H | -2.73233600 | 3.30309600  | 2.61852300  |
| C | 0.03466300  | 0.60658000  | 2.62998000  |
| H | -1.50190800 | -0.76137500 | 1.99106400  |
| C | 0.35378900  | 1.92392200  | 2.96649100  |
| H | -0.40961000 | 3.92290000  | 3.22074100  |
| H | 0.80033000  | -0.16456400 | 2.65047800  |
| H | 1.37073100  | 2.19028300  | 3.24320300  |
| H | -3.83994200 | -1.06431600 | 2.01151100  |
| C | -3.85249700 | 0.80626300  | 0.36087900  |
| C | -5.06988200 | 0.14725400  | -0.20840300 |
| C | -6.29731700 | 0.15449300  | 0.45676100  |

|    |             |             |             |
|----|-------------|-------------|-------------|
| C  | -4.96272400 | -0.43521800 | -1.47501700 |
| C  | -7.42137200 | -0.39682300 | -0.15658300 |
| H  | -6.37565300 | 0.58890700  | 1.44858000  |
| C  | -6.08128100 | -0.99758000 | -2.07757500 |
| H  | -3.98409800 | -0.47124300 | -1.94609000 |
| C  | -7.31403000 | -0.97232800 | -1.42125000 |
| H  | -8.37918300 | -0.38041600 | 0.35481000  |
| H  | -5.99651200 | -1.46176800 | -3.05578400 |
| H  | -8.18926200 | -1.40842200 | -1.89420200 |
| O  | -3.04441400 | 1.33854800  | -0.37287500 |
| Br | -1.08787400 | -1.05207200 | -1.17934000 |
| Br | -2.85627700 | -2.48949300 | 0.51217100  |
| C  | 3.83263600  | 1.02031600  | 0.08849000  |
| C  | 4.30896300  | 0.19546600  | 1.25498900  |
| C  | 4.95978800  | 0.83597000  | -0.87760400 |
| C  | 5.50523400  | -0.42099100 | 0.89660100  |
| C  | 3.77086900  | -0.05186100 | 2.50788900  |
| N  | 5.84972900  | 0.02304500  | -0.41679800 |
| H  | 5.06415400  | 1.27802600  | -1.86167500 |
| C  | 6.20581500  | -1.29270000 | 1.71209000  |
| C  | 4.45337700  | -0.92539000 | 3.35818600  |
| H  | 2.85025900  | 0.42615100  | 2.82361500  |
| C  | 7.04450200  | -0.43524800 | -1.11896700 |
| C  | 5.64636200  | -1.53924700 | 2.96616100  |
| H  | 7.13509500  | -1.75696900 | 1.39937700  |
| H  | 4.04940500  | -1.13059100 | 4.34424900  |
| H  | 7.91770400  | -0.20959000 | -0.50497800 |
| H  | 6.95814900  | -1.51370400 | -1.26666700 |
| H  | 7.10228200  | 0.08001700  | -2.07590300 |
| H  | 6.15082300  | -2.21522400 | 3.64847100  |
| H  | 1.72911900  | 0.64883200  | 0.27962800  |
| O  | 0.11022900  | -0.13393000 | -2.33999100 |
| H  | 0.74161900  | -0.83357100 | -2.58286000 |

## Int2

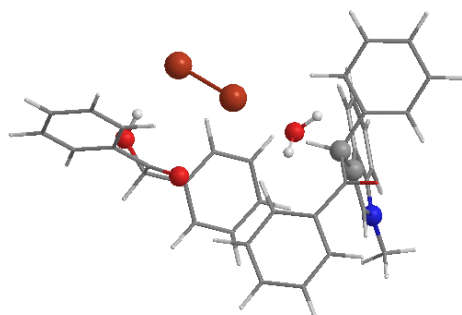

M062X/6-31g(d), SCRF=(smd,solvent=Acetonitrile), Int=UltraFine, E(RM062X) = -6928.32803126

|   |             |             |             |
|---|-------------|-------------|-------------|
| C | 2.44148100  | 0.65100300  | 0.79879900  |
| C | 2.91425500  | 2.09119400  | 0.70879200  |
| C | 4.24816900  | 2.42187600  | 0.96842200  |
| C | 2.02604400  | 3.10969800  | 0.35918000  |
| C | 4.68014700  | 3.74246600  | 0.88772700  |
| H | 4.94984500  | 1.63436700  | 1.22871300  |
| C | 2.45607700  | 4.43422000  | 0.27313000  |
| H | 0.98920200  | 2.86378400  | 0.14467200  |
| C | 3.78470300  | 4.75455400  | 0.53933500  |
| H | 5.71934300  | 3.98309100  | 1.09297600  |
| H | 1.75156900  | 5.21209100  | -0.00682100 |
| H | 4.12330100  | 5.78415600  | 0.47111100  |
| C | 2.38431800  | 0.17891500  | 2.25888000  |
| C | 1.52701000  | -1.00420800 | 2.61265200  |
| C | 0.33994400  | -1.33624400 | 1.95028200  |
| C | 1.96559600  | -1.79731700 | 3.68155500  |
| C | -0.39530400 | -2.44677700 | 2.36526500  |
| H | -0.05392200 | -0.71807300 | 1.14579900  |
| C | 1.24368800  | -2.91749000 | 4.07464600  |
| H | 2.88471900  | -1.52402600 | 4.19084900  |
| C | 0.05822800  | -3.24257500 | 3.41483300  |
| H | -1.32809900 | -2.67450300 | 1.86157100  |
| H | 1.59979100  | -3.53281200 | 4.89541000  |
| H | -0.51509900 | -4.11199800 | 3.72313400  |
| O | 3.10688300  | 0.67013400  | 3.10255700  |
| O | -3.70410200 | -1.37713400 | -2.42384200 |

|    |             |             |             |
|----|-------------|-------------|-------------|
| C  | -3.17368100 | -1.97892600 | -1.25700300 |
| C  | -1.67095600 | -2.16256600 | -1.31456400 |
| H  | -3.64655600 | -2.96787400 | -1.18766600 |
| C  | -1.09253100 | -3.37485500 | -0.94139800 |
| C  | -0.84509700 | -1.11948900 | -1.74310900 |
| C  | 0.29135800  | -3.54801200 | -0.99277600 |
| H  | -1.73039600 | -4.19208600 | -0.61212900 |
| C  | 0.53453600  | -1.28823200 | -1.79459000 |
| H  | -1.27533400 | -0.17116200 | -2.05218800 |
| C  | 1.10866200  | -2.50439500 | -1.41962400 |
| H  | 0.72686500  | -4.49972800 | -0.70255700 |
| H  | 1.16440100  | -0.47192800 | -2.13633600 |
| H  | 2.18688900  | -2.63512200 | -1.47081200 |
| H  | -3.55278000 | -0.42083500 | -2.36114000 |
| C  | -3.59663000 | -1.21261000 | 0.01073400  |
| C  | -4.98454300 | -0.66151900 | 0.08544600  |
| C  | -6.05197500 | -1.22177100 | -0.62281600 |
| C  | -5.20403400 | 0.43361600  | 0.92899900  |
| C  | -7.33379600 | -0.69917300 | -0.46939500 |
| H  | -5.88497300 | -2.06332900 | -1.28713500 |
| C  | -6.48017900 | 0.96593700  | 1.06327400  |
| H  | -4.35803400 | 0.86834600  | 1.45509900  |
| C  | -7.54745800 | 0.39451300  | 0.36815500  |
| H  | -8.16530500 | -1.14261500 | -1.00826800 |
| H  | -6.64628600 | 1.82386400  | 1.70748400  |
| H  | -8.54666800 | 0.80578700  | 0.47673700  |
| O  | -2.82159000 | -1.06084500 | 0.93474200  |
| Br | -1.55523900 | 1.73803500  | 0.36899800  |
| Br | -3.01339300 | 1.91328100  | -1.41612600 |
| C  | 3.34592400  | -0.29246000 | 0.03472100  |
| C  | 3.75890700  | -0.13271300 | -1.33587000 |
| C  | 3.93170600  | -1.45493200 | 0.47239400  |
| C  | 4.57698600  | -1.24660400 | -1.65194000 |
| C  | 3.52036100  | 0.83636700  | -2.32748800 |
| N  | 4.66502200  | -2.03745200 | -0.53299000 |

|   |             |             |             |
|---|-------------|-------------|-------------|
| H | 3.88418100  | -1.94171800 | 1.43855700  |
| C | 5.15280600  | -1.42215800 | -2.91696500 |
| C | 4.08668200  | 0.66662400  | -3.58072800 |
| H | 2.90057600  | 1.70322600  | -2.11274700 |
| C | 5.42150000  | -3.27017500 | -0.43797600 |
| C | 4.89575700  | -0.45227500 | -3.87216000 |
| H | 5.77546700  | -2.28448300 | -3.13688900 |
| H | 3.90930500  | 1.40744600  | -4.35455600 |
| H | 5.04552500  | -4.00593500 | -1.15501500 |
| H | 6.48098500  | -3.08502800 | -0.63746200 |
| H | 5.31325500  | -3.66900000 | 0.57128600  |
| H | 5.32532800  | -0.55389100 | -4.86423800 |
| H | 1.43029900  | 0.59615200  | 0.37199700  |
| O | 0.05020900  | 1.67808700  | 2.36545600  |
| H | 0.21449100  | 2.58395600  | 2.68088200  |
| H | -0.38809600 | 1.22301100  | 3.10584700  |

## TS

M062X/6-31g(d), SCRF=(smd,solvent=Acetonitrile), Int=UltraFine, E(RM062X)=-6928.25169681

|   |            |             |             |
|---|------------|-------------|-------------|
| C | 1.73166900 | 0.35307700  | -0.78081800 |
| C | 2.27884900 | -0.93944300 | -1.05283500 |
| H | 2.76209400 | 1.84648600  | 1.31316500  |
| C | 3.17425700 | -1.21194500 | -2.11126800 |
| C | 1.92872100 | -1.97727900 | -0.15784200 |
| C | 3.70033900 | -2.48763200 | -2.25617800 |
| H | 3.44542300 | -0.42249800 | -2.80097800 |
| C | 2.45813600 | -3.24729800 | -0.31295300 |
| H | 1.23021500 | -1.76268600 | 0.64621900  |
| C | 3.35296000 | -3.49888100 | -1.35659000 |
| H | 4.38996700 | -2.69715900 | -3.06775300 |
| H | 2.18935300 | -4.03834200 | 0.37946300  |
| H | 3.77800600 | -4.49155100 | -1.47288700 |
| C | 1.82600100 | 1.58004500  | -1.65387100 |
| C | 1.19917700 | 2.82924400  | -1.13036700 |
| C | 0.05388800 | 2.82026900  | -0.32629100 |

|   |             |             |             |
|---|-------------|-------------|-------------|
| C | 1.79041800  | 4.04414100  | -1.49709400 |
| C | -0.49557300 | 4.02862100  | 0.09466300  |
| H | -0.45727100 | 1.89111400  | -0.08174000 |
| C | 1.25459700  | 5.24490300  | -1.04660200 |
| H | 2.67218000  | 4.03327900  | -2.13141100 |
| C | 0.10784600  | 5.23657800  | -0.25150200 |
| H | -1.40645700 | 4.01286000  | 0.68382100  |
| H | 1.72419900  | 6.18493500  | -1.31931900 |
| H | -0.32045700 | 6.17410600  | 0.09063400  |
| O | 2.41934600  | 1.56596100  | -2.71679900 |
| O | -4.07898500 | -0.46610400 | 2.35302000  |
| C | -3.53140900 | 0.77055700  | 1.97477400  |
| C | -2.09205200 | 0.95355000  | 2.42553600  |
| H | -4.14378000 | 1.54071300  | 2.46585800  |
| C | -1.63977100 | 2.20210100  | 2.85283000  |
| C | -1.20097800 | -0.12130900 | 2.39397200  |
| C | -0.31064000 | 2.38566300  | 3.23242500  |
| H | -2.33577300 | 3.03699800  | 2.89044100  |
| C | 0.12746200  | 0.06076200  | 2.77060500  |
| H | -1.54020700 | -1.10366000 | 2.07795200  |
| C | 0.57923800  | 1.31335600  | 3.18951300  |
| H | 0.02714700  | 3.36360600  | 3.56344200  |
| H | 0.80582000  | -0.78758000 | 2.74740100  |
| H | 1.61389600  | 1.44984800  | 3.49379600  |
| H | -3.76735900 | -1.15817800 | 1.73426500  |
| C | -3.64962800 | 1.09072900  | 0.46732600  |
| C | -4.66860800 | 0.40250200  | -0.38588800 |
| C | -5.87440100 | -0.09900800 | 0.11547800  |
| C | -4.40617400 | 0.33695000  | -1.75973100 |
| C | -6.80839800 | -0.65636900 | -0.75488400 |
| H | -6.08259700 | -0.05005900 | 1.17802500  |
| C | -5.33011000 | -0.24141200 | -2.62089700 |
| H | -3.46244800 | 0.72537600  | -2.12902400 |
| C | -6.53502900 | -0.73607700 | -2.11899000 |
| H | -7.74936000 | -1.03342000 | -0.36569400 |

|    |             |             |             |
|----|-------------|-------------|-------------|
| H  | -5.11711400 | -0.30344500 | -3.68392600 |
| H  | -7.26061500 | -1.18275600 | -2.79263800 |
| O  | -2.93829800 | 1.95331200  | -0.01107300 |
| Br | -1.33353200 | -1.04754200 | -0.93722300 |
| Br | -2.84784200 | -2.75615700 | 0.32179900  |
| C  | 3.46153400  | 1.15731000  | 0.85819400  |
| C  | 3.95668200  | -0.08042700 | 1.40199200  |
| C  | 4.26473500  | 1.43741900  | -0.24931600 |
| C  | 4.97060100  | -0.52823900 | 0.52342600  |
| C  | 3.63710800  | -0.86988200 | 2.51641400  |
| N  | 5.12743500  | 0.42834500  | -0.47335900 |
| H  | 4.26431900  | 2.30486500  | -0.89688900 |
| C  | 5.65212500  | -1.73165000 | 0.69583600  |
| C  | 4.31265900  | -2.06870100 | 2.70296600  |
| H  | 2.89126100  | -0.54284000 | 3.23371800  |
| C  | 6.11048600  | 0.35549600  | -1.54136500 |
| C  | 5.30203100  | -2.49872600 | 1.80031700  |
| H  | 6.42257600  | -2.05216100 | 0.00122100  |
| H  | 4.07746700  | -2.68540800 | 3.56482200  |
| H  | 7.11843900  | 0.45167400  | -1.12960300 |
| H  | 6.01936200  | -0.60196200 | -2.05970600 |
| H  | 5.92068900  | 1.16788600  | -2.24306500 |
| H  | 5.80887800  | -3.44279900 | 1.97486900  |
| H  | 1.10923200  | 0.43840700  | 0.10514800  |
| O  | -0.20080300 | 0.25413200  | -1.91529300 |
| H  | 0.08640000  | -0.24698100 | -2.70100700 |
